# Supplementary material
Source: PubMed Central journal article supplement (PMC4256781)
Supplement: supp_114.169979_FigureS1.pdf [file supp_114.169979_FigureS1.pdf]

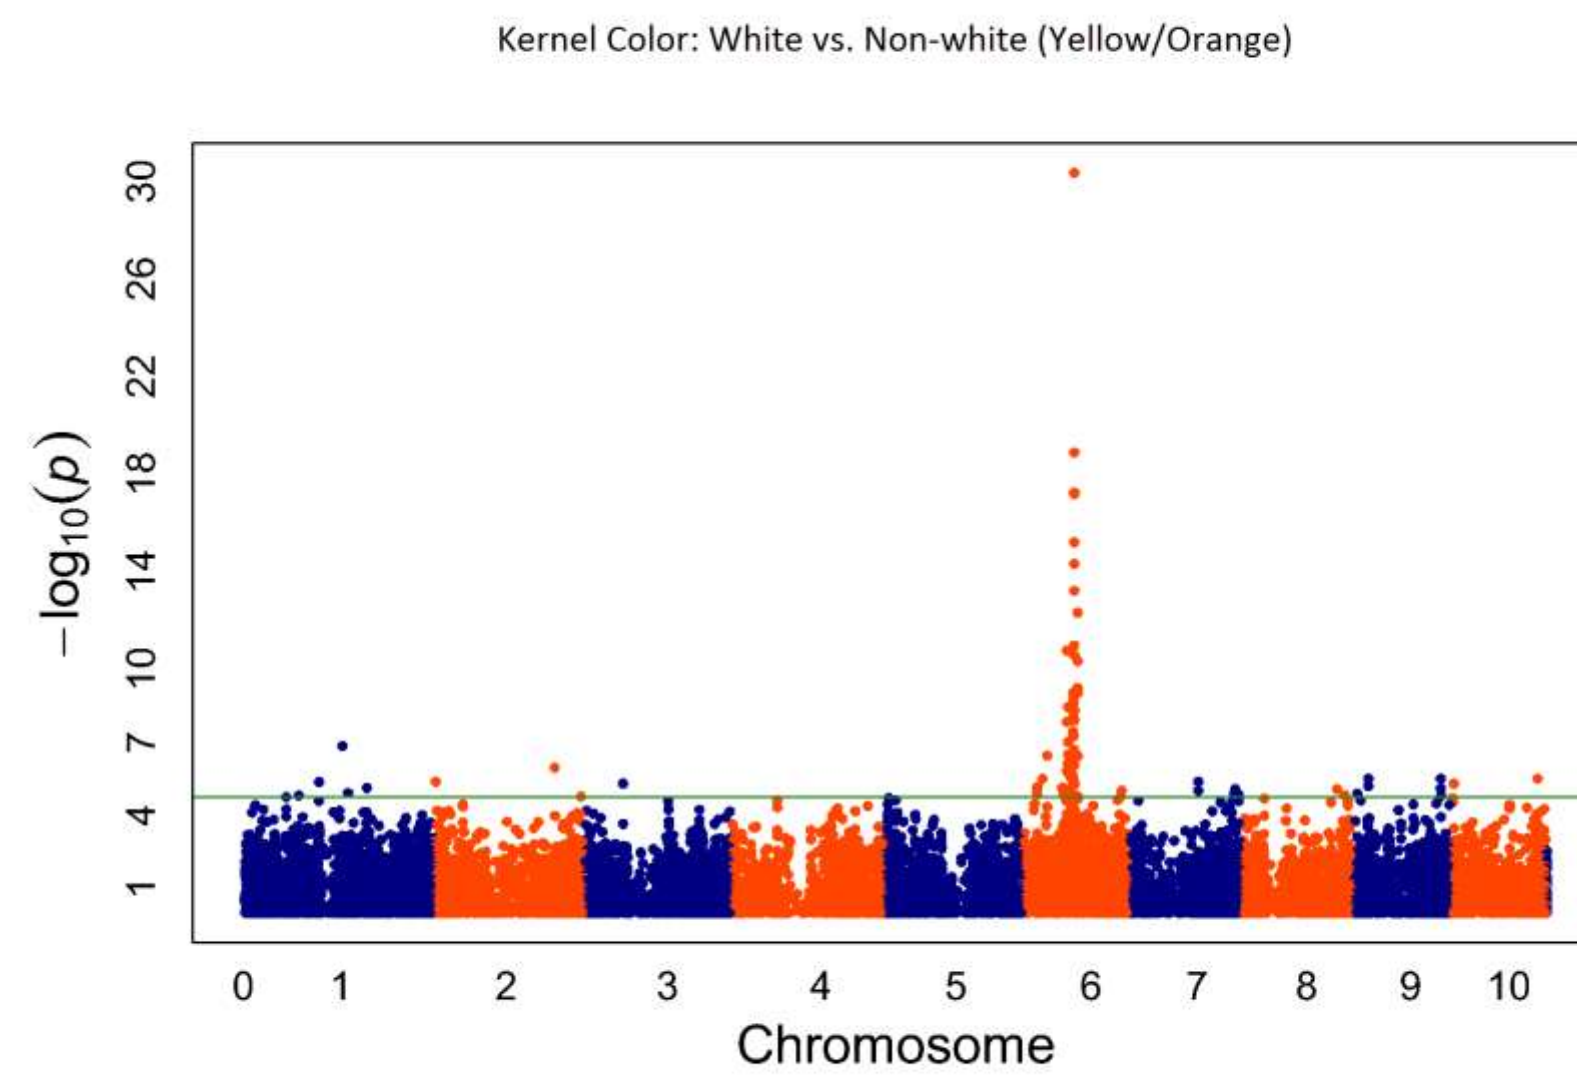

**Figure S1.** Genome-wide association study (GWAS) of a binary kernel color trait: white vs. non-white. The non-white class included maize inbred lines ranging from yellow to dark orange in kernel color. Scatter plot of association results from a unified mixed model analysis of the kernel color trait. Negative  $\log_{10}$ -transformed  $P$ -values (y-axis) from GWAS are plotted against physical position (B73 RefGen\_v2) on each of 10 chromosomes (x-axis). Chromosomes are alternately colored. The horizontal green line indicates the  $-\log_{10} P$ -value of the least statistically significant SNP at 5% false discovery rate.
