# Supplementary material
Source: PubMed Central journal article supplement (PMC4256781)
Supplement: supp_114.169979_FigureS4.pdf [file supp_114.169979_FigureS4.pdf]

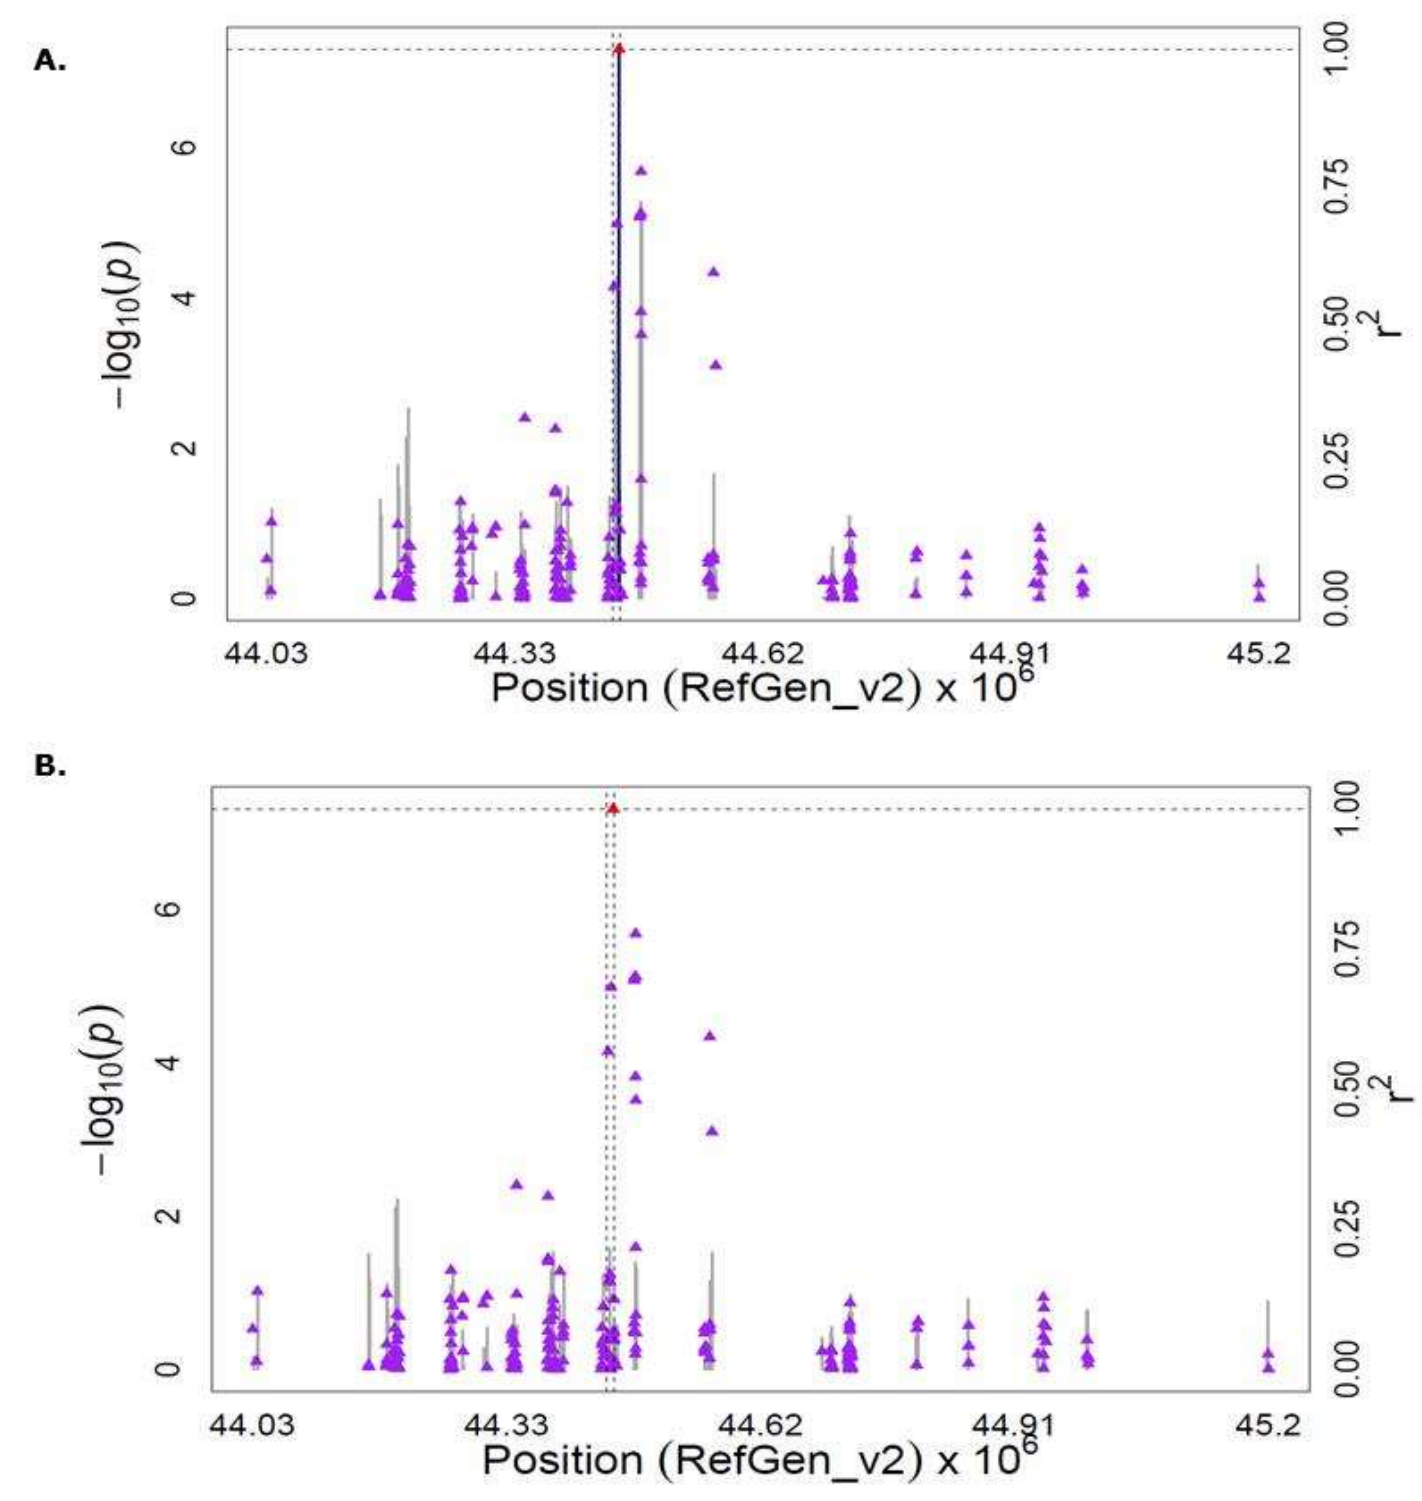

**Figure S4** Genome-wide association study (GWAS) for the ratio of total  $\beta$ -xanthophylls to total  $\alpha$ -xanthophylls content in maize grain. (A) Scatter plot of association results from a unified mixed model analysis of the ratio of total  $\beta$ -xanthophylls to total  $\alpha$ -xanthophylls and linkage disequilibrium (LD) estimates ( $r^2$ ) across the *zep1* chromosome region. Negative  $\log_{10}$ -transformed  $P$ -values (left y-axis) from a GWAS for the ratio of total  $\beta$ -xanthophylls to total  $\alpha$ -xanthophylls and  $r^2$  values (right y-axis) are plotted against physical position (B73 RefGen\_v2) for a 1.2 Mb region on chromosome 2 that encompasses *zep1*. The blue vertical lines are  $-\log_{10}$   $P$ -values for SNPs that are statistically significant for the ratio of total  $\beta$ -xanthophylls to total  $\alpha$ -xanthophylls at 5% false discovery rate (FDR), while the gray vertical lines are  $-\log_{10}$   $P$ -values for SNPs that are non-significant at 5% FDR. Triangles are the  $r^2$  values of each SNP relative to the peak SNP (indicated in red) at 44,448,432 bp. The black horizontal dashed line indicates the  $-\log_{10}$   $P$ -value of the least statistically significant SNP at 5% FDR. The black vertical dashed lines indicate the start and stop positions of *zep1* (GRMZM2G127139). (B) Scatter plot of association results from a conditional unified mixed model analysis of the ratio of total  $\beta$ -xanthophylls to total  $\alpha$ -xanthophylls and LD estimates ( $r^2$ ) across the *zep1* chromosome region, as in (A). The peak SNP from the unconditional GWAS (S2\_44448432; 44,448,432 bp) was included as a covariate in the unified mixed model to control for the *zep1* effect.
