# Supplementary material
Source: PubMed Central journal article supplement (PMC4256781)
Supplement: supp_114.169979_FigureS12.pdf [file supp_114.169979_FigureS12.pdf]

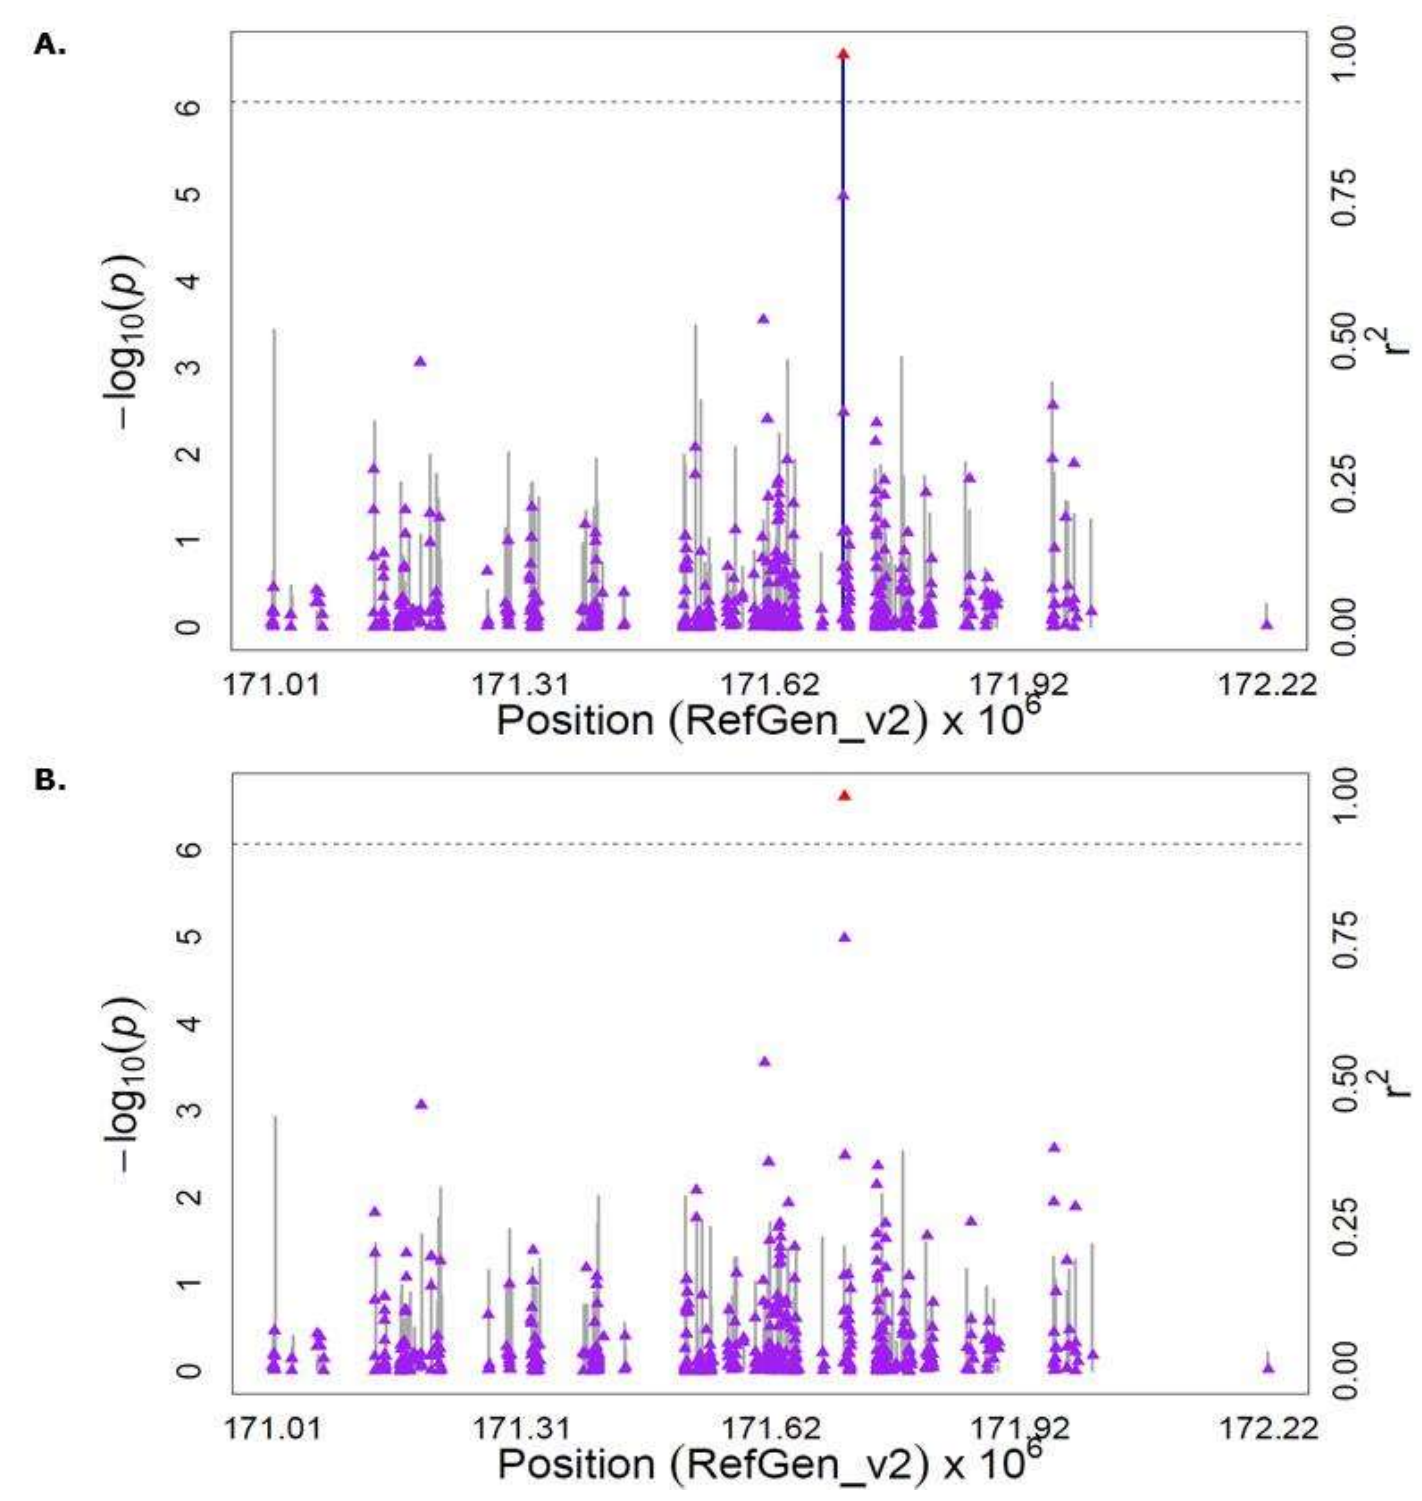

**Figure S12** Genome-wide association study (GWAS) for zeaxanthin content in maize grain. (A) Scatter plot of association results from a unified mixed model analysis of zeaxanthin and linkage disequilibrium (LD) estimates ( $r^2$ ) across the surrounding chromosome region. Negative  $\log_{10}$ -transformed  $P$ -values (left y-axis) from a GWAS for zeaxanthin and  $r^2$  values (right y-axis) are plotted against physical position (B73 RefGen\_v2) for a 1.2 Mb region on chromosome 8. The blue vertical lines are  $-\log_{10} P$ -values for SNPs that are statistically significant for zeaxanthin at 5% false discovery rate (FDR), while the gray vertical lines are  $-\log_{10} P$ -values for SNPs that are non-significant at 5% FDR. Triangles are the  $r^2$  values of each SNP relative to the peak SNP (indicated in red) at 171,705,574 bp. The black horizontal dashed line indicates the  $-\log_{10} P$ -value of the least statistically significant SNP at 5% FDR. (B) Scatter plot of association results from a conditional unified mixed model analysis of zeaxanthin and LD estimates ( $r^2$ ) across the 1.2 Mb chromosome region, as in (A). The peak SNP from the unconditional GWAS (S8\_171705574; 171,705,574 bp) was included as a covariate in the unified mixed model to control for the novel effect detected on chromosome 8.
