# Supplementary material
Source: PubMed Central journal article supplement (PMC4256781)
Supplement: supp_114.169979_FigureS13.pdf [file supp_114.169979_FigureS13.pdf]

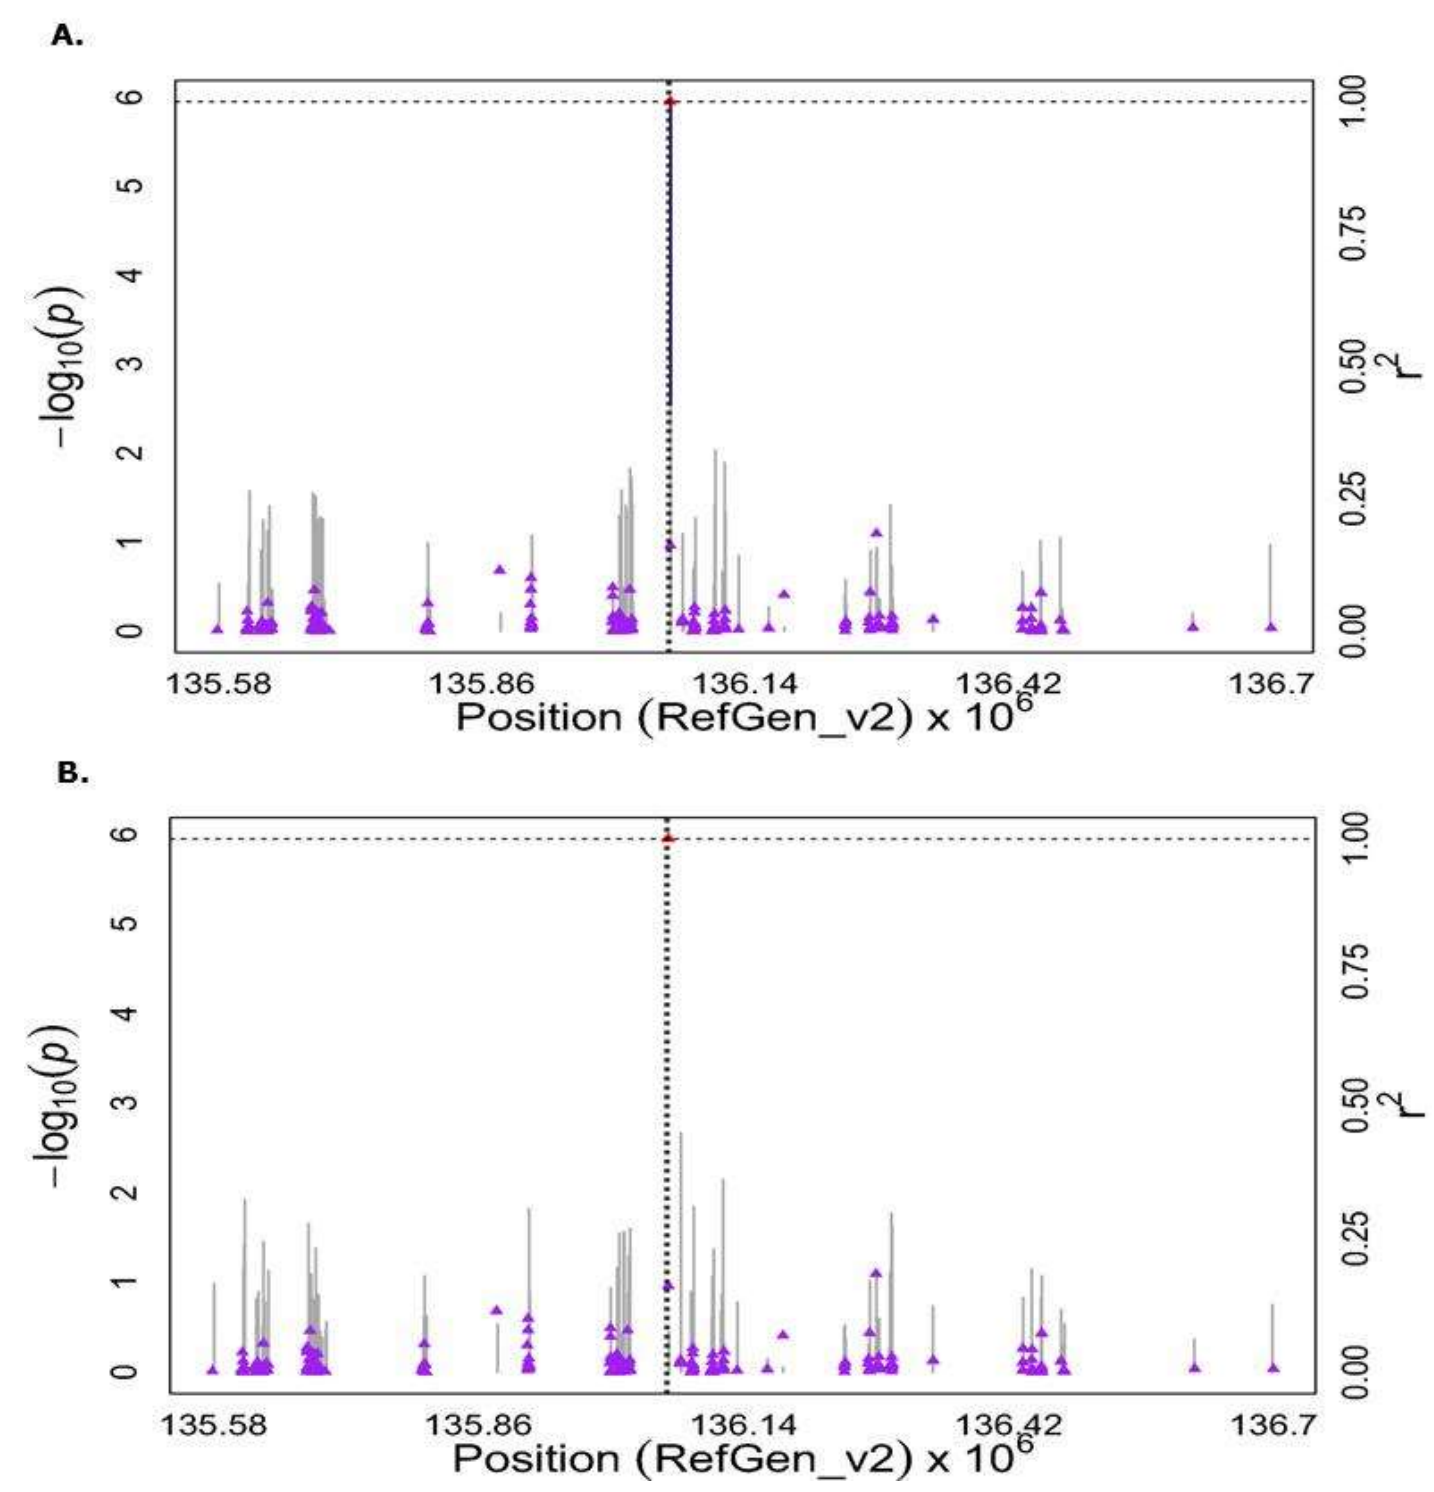

**Figure S13** Genome-wide association study (GWAS) for zeaxanthin content in maize grain. (A) Scatter plot of association results from a unified mixed model analysis of zeaxanthin and linkage disequilibrium (LD) estimates ( $r^2$ ) across the *cr1RB1* chromosome region. Negative  $\log_{10}$ -transformed  $P$ -values (left y-axis) from a GWAS of zeaxanthin and  $r^2$  values (right y-axis) are plotted against physical position (B73 RefGen\_v2) for a 1.2 Mb region on chromosome 10 that encompasses *cr1RB1*. The blue vertical lines are  $-\log_{10} P$ -values for SNPs that are statistically significant for zeaxanthin at 5% false discovery rate (FDR), while the gray vertical lines are  $-\log_{10} P$ -values for SNPs that are non-significant at 5% FDR. Triangles are the  $r^2$  values of each SNP relative to the peak polymorphism (indicated in red) at 136,059,748 bp. The black horizontal dashed line indicates the  $-\log_{10} P$ -value of the least statistically significant SNP at 5% FDR. The black vertical dashed lines indicate the start and stop positions of *cr1RB1* (GRMZM2G152135). (B) Scatter plot of association results from a conditional unified mixed model analysis of zeaxanthin and LD estimates ( $r^2$ ) across the *cr1RB1* chromosome region, as in (A). The peak polymorphism from the unconditional GWAS (*cr1RB1* InDel4; 136,059,748 bp) was included as a covariate in the unified mixed model to control for the *cr1RB1* effect.
