# Supplementary material
Source: PubMed Central journal article supplement (PMC4256781)
Supplement: supp_114.169979_TableS2.pdf [file supp_114.169979_TableS2.pdf]

**Table S1 Best Linear Unbiased Predictor (BLUP) Values.** BLUP values for the 24 carotenoid traits used for the genome-wide association study, pathway-level analysis, and genomic prediction for 201 inbred maize lines.

Table S1 is available for download as an Excel file at <http://www.genetics.org/lookup/suppl/doi:10.1534/genetics.114.169979/-/DC1>.

**Table S2 Coordinates for Additional Insertion-Deletion (Indel) and Single-Nucleotide Polymorphism (SNP) Markers**

| Gene-Specific Assay | PCR-Based Marker | Primer Sequence (5'-3'direction) | Specific to PCR Primer |             |             | Coordinates Spanning Longest Amplicon Length <sup>b</sup> |             |             |
|---------------------|------------------|----------------------------------|------------------------|-------------|-------------|-----------------------------------------------------------|-------------|-------------|
|                     |                  |                                  | Chr                    | Start AGP2  | StopAGP2    | Chr                                                       | Start AGP2  | StopAGP2    |
| PSY1-Indel388       | PSY-8F           | TGAAACAAACAAAGCCAGCA             | chr6                   | 82,016,321  | 82,016,340  |                                                           |             |             |
|                     | PSY-9R           | GCCTCTCTCTTCTTGCGTA              | chr6                   | 82,017,115  | 82,017,134  |                                                           |             |             |
|                     | PSY-10F          | GAAACAAACAAAGCCAGCAG             | chr6                   | 82,016,322  | 82,016,341  |                                                           |             |             |
|                     | PSY-11R          | CTCCGGCCTCTCTCTTCT               | chr6                   | 82,017,121  | 82,017,139  | chr6                                                      | 82,016,321  | 82,017,139  |
| LCYE-5'TE           | LYCe-TE103PF-F1  | CGCTAGCAAGCCATTATTTT             | chr8                   | 138,882,291 | 138,882,313 |                                                           |             |             |
|                     | LYCe-TE103PF-R1  | CGGTATGGTTTTGGTATACGG            | chr8                   | °           |             |                                                           |             |             |
|                     | LYCe-ZGt111R1-F1 | AAGCATCCGACAAAATAACAG            | chr8                   | 138,882,423 | 138,882,444 |                                                           |             |             |
|                     | LYCe-TE105PR-R1  | GAGAGGAGAGCAGCAGACAC             | chr8                   | 138,882,649 | 138,882,670 | chr8                                                      | 138,882,291 | 138,882,670 |
| LCYE-SNP216         | LYCe-SNP216-F1   | GCGGAGTGGGCGTGGAT                | chr8                   | 138,883,009 | 138,883,026 |                                                           |             |             |
|                     | LYCe-SNP216-R1   | TGAAGTACGGCTGCAGGACAACG          | chr8                   | 138,883,381 | 138,883,403 | chr8                                                      | 138,883,009 | 138,883,403 |
| LCYE-3'             | LYCe-3'indl-F1   | GTACGTCGTTTCATCTCCCGTACCC        | chr8                   | °           |             |                                                           |             |             |
|                     | LYCe-3'indl-R1   | CTTGGTGAACGCATTCTGTGG            | chr8                   | °           |             |                                                           |             |             |
|                     | LYCe-3'indl-F2   | GGACCGAACAGCAACTG                | chr8                   | °           |             |                                                           |             |             |
|                     | LYCe-3'indl-R2   | GGCGAAATGGGTACGGCC               | chr8                   | °           |             | chr8                                                      | 138,889,812 | 138,892,812 |
| CCD1-5'             | CCD1-WC-L1       | CCGTGCTGGACAGAATAGT              | chr8                   | °           |             |                                                           |             |             |
|                     | CCD1-B73-rev-L1  | CTCACACGTGCAACGCC                | chr9                   | 152,093,059 | 152,093,042 |                                                           |             |             |
|                     | CCD1-ALL-R1      | GTGGTTTCGGTGGCTGTC               | chr9                   | 152,092,686 | 152,092,700 | chr9                                                      | 152,092,686 | 152,093,042 |
| crtRB1-5'TE         | crtRB1 H1UF      | TTAGAGCCTCGACCCTCTGTG            | chr10                  | 136,061,212 | 136,061,232 |                                                           |             |             |
|                     | crtRB1 H1UR      | AATCCCTTCCATGTTACGC              | chr10                  | 136,060,416 | 136,060,435 | chr10                                                     | 136,060,416 | 136,061,232 |
| crtRB1-InDel4       | crtRB1 D4F       | ACCGTCACGTGCTTCGTGCC             | chr10                  | 136,059,806 | 136,059,787 |                                                           |             |             |
|                     | crtRB1 D4R       | CTTCCGCGCTCCTTCTC                | chr10                  | 136,059,690 | 136,059,708 | chr10                                                     | 136,059,690 | 136,059,806 |
| crtRB1-3'TE         | crtRB1 65F       | ACACCACATGGACAAGTTCG             | chr10                  | °           |             |                                                           |             |             |
|                     | crtRB1 62R       | ACACTGTGGCCATGAACAC              | chr10                  | °           |             |                                                           |             |             |
|                     | crtRB1 66R       | ACAGCAATACAGGGACCAG              | chr10                  | °           |             | chr10                                                     | 136,060,219 | 136,063,219 |

RefGen\_v2 Coordinates and PCR primer sequences for the additional seven indel markers and one SNP marker within and near the coding regions of one carotenoid degradation gene and three carotenoid biosynthetic pathway genes.

Amplification protocols for gene-specific PCR-based marker sets are listed in: Fu et al. 2013b for PSY1; Harjes et al. 2008 for LCYE; Kandianis et al. for CCD1; Yan et al. 2010 for crtRB1.

<sup>a</sup>RefGen\_v2 Coordinates are not available

<sup>b</sup>Physical distance encompassing all possible primer combinations
