# Supplementary material
Source: PubMed Central journal article supplement (PMC4256781)
Supplement: supp_114.169979_TableS3.pdf [file supp_114.169979_TableS3.pdf]

**Table S3 Genomic Information for the 58 *a priori* Candidate Genes (A)**

| <i>a priori</i> candidate gene pathway | MaizeGDB Name | MaizeGDB Full Name                                  | MaizeGDB Synonym(s)                                                                                                                                                                               | RefGen_v2 Gene Model ID | Annotated Gene Function                                | RefGen_v2 Chromosome | RefGen_v2 ORF Start bp | RefGen_v2 ORF Stop bp |
|----------------------------------------|---------------|-----------------------------------------------------|---------------------------------------------------------------------------------------------------------------------------------------------------------------------------------------------------|-------------------------|--------------------------------------------------------|----------------------|------------------------|-----------------------|
| carotenoid_synthesis_and_degradation   | ao1           | aldehyde oxidase1                                   | ao1, cl1856_2b, aldehyde oxidase1                                                                                                                                                                 | GRMZM2G141535           | Aldehyde oxidase and xanthine dehydrogenase            | 1                    | 286,448,581            | 286,456,365           |
| carotenoid_synthesis_and_degradation   | ao2           | aldehyde oxidase2                                   | ao2                                                                                                                                                                                               | GRMZM5G899851           | Aldehyde oxidase and xanthine dehydrogenase            | 5                    | 4,588,532              | 4,592,775             |
| carotenoid_synthesis_and_degradation   | ao3           | aldehyde oxidase3                                   | ao3, TMR51, aldehyde oxidase3, GRMZM2G124260, rs131175362, ss196414838, pzb01403, IDP2436                                                                                                         | GRMZM2G019799           | Aldehyde oxidase and xanthine dehydrogenase            | 1                    | 286,358,278            | 286,366,211           |
| carotenoid_synthesis_and_degradation   | ao4           | aldehyde oxidase4                                   | ao4                                                                                                                                                                                               | GRMZM2G141473           | Aldehyde oxidase and xanthine dehydrogenase            | 1                    | 286,506,118            | 286,513,080           |
| carotenoid_synthesis_and_degradation   | ao5           | aldehyde oxidase5                                   | ao5                                                                                                                                                                                               | GRMZM2G406830           | Aldehyde oxidase and xanthine dehydrogenase            | 7                    | 7,446,258              | 7,451,594             |
| carotenoid_synthesis_and_degradation   | ccd7          | carotenoid cleavage dioxygenase7                    | ccd7                                                                                                                                                                                              | GRMZM2G158657           | *carotenoid cleavage dioxygenase7                      | 2                    | 19,458,968             | 19,461,625            |
| carotenoid_synthesis_and_degradation   | ccd8          | carotenoid cleavage dioxygenase8                    | ccd8, ccd8a, Zmccd8                                                                                                                                                                               | GRMZM2G446858           | *carotenoid cleavage dioxygenase8                      | 3                    | 197,015,856            | 197,019,350           |
| Prenyl_Group_Synthesis                 | chph1         | chlorophyllase1                                     | chph1                                                                                                                                                                                             | GRMZM2G170734           | chlorophyllase, chloroplast                            | 7                    | 62,130,993             | 62,132,323            |
| Prenyl_Group_Synthesis                 | cmk1          | 4-diphosphocytidyl-2-C-methyl-D-erythritol kinase1  | cmk1, umc2169, 4-diphosphocytidyl-2-C-methyl-D-erythritol kinase1, cdp-me kinase1, cdpmek1                                                                                                        | GRMZM5G859195           | 4-diphosphocytidyl-2-C-methyl-D-erythritol kinase      | 3                    | 187,922,271            | 187,927,591           |
| carotenoid_synthesis_and_degradation   | crt1          | carotene isomerase1                                 | crt1, carotenoid isomerase1, CRTISO1                                                                                                                                                              | GRMZM2G108457           | carotenoid isomerase                                   | 4                    | 200,869,070            | 200,873,710           |
| carotenoid_synthesis_and_degradation   | crt2          | carotene isomerase2                                 | crt2, carotenoid isomerase2, CRTISO2                                                                                                                                                              | GRMZM2G106531           | carotenoid isomerase                                   | 2                    | 226,366,352            | 226,371,341           |
| carotenoid_synthesis_and_degradation   | crt3          | carotene isomerase3                                 | crt3, CRTISO3                                                                                                                                                                                     | GRMZM2G144273           | carotenoid isomerase                                   | 5                    | 1,333,304              | 1,341,577             |
| carotenoid_synthesis_and_degradation   | cyp13         | cytochrome P450 13                                  | cyp13, Cytochrome P450, CYP97A16, lutein5, lut5, CYP97A                                                                                                                                           | GRMZM5G837869           | CYP97A3, Cytochrome P450 beta-ring hydroxylase         | 5                    | 215,827,224            | 215,831,730           |
| carotenoid_synthesis_and_degradation   | cyp14         | cytochrome P450 14                                  | cyp14, CYP97C, lutein1, lut1, cytochrome P450-type monooxygenase CYP97C1                                                                                                                          | GRMZM2G143202           | CYP97A3, Cytochrome P450 epsilon-ring hydroxylase      | 1                    | 86,838,334             | 86,848,726            |
| carotenoid_synthesis_and_degradation   | cyp15         | cytochrome P450 15                                  | cyp15, CYP97B, cytochrome P450-type monooxygenase CYP97B3                                                                                                                                         | GRMZM2G010221           | CYP97B, cytochrome P450                                | 4                    | 235,724,340            | 235,728,875           |
| Prenyl_Group_Synthesis                 | dmes1         | 4-Diphosphocytidyl-2C-methyl-D-erythritol synthase1 | dmes1, si618008b02(470), si618008b02f                                                                                                                                                             | GRMZM5G856881           | 2-C-methyl-D-erythritol 4-phosphate cytidyltransferase | 3                    | 170,115,790            | 170,118,780           |
| Prenyl_Group_Synthesis                 | dmes2         | 4-Diphosphocytidyl-2C-methyl-D-erythritol synthase2 | dmes2                                                                                                                                                                                             | GRMZM2G172032           | 2-C-methyl-D-erythritol 4-phosphate cytidyltransferase | 8                    | 164,748,939            | 164,752,371           |
| Prenyl_Group_Synthesis                 | dxr1          | deoxy xylulose reductoisomerase1                    | dxr1, IDP154, deoxy xylulose reductoisomerase1, 1-deoxy-D-xylulose 5-phosphate reductoisomerase1, CL389_1(210), CL389_1b                                                                          | GRMZM2G056975           | 1-deoxy-D-xylulose 5-phosphate reductoisomerase        | 3                    | 30,226,804             | 30,233,358            |
| Prenyl_Group_Synthesis                 | dxr2          | deoxy xylulose reductoisomerase2                    | dxr2                                                                                                                                                                                              | GRMZM2G036290           | 1-deoxy-D-xylulose 5-phosphate reductoisomerase        | 8                    | 8,094,442              | 8,101,055             |
| Prenyl_Group_Synthesis                 | dxs1          | deoxy xylulose synthase1                            | dxs1, PZA02247, CL392_1, AY110050, deoxy xylulose synthase1                                                                                                                                       | GRMZM2G137151           | 1-deoxy-D-xylulose 5-phosphate synthase                | 6                    | 146,378,393            | 146,382,661           |
| Prenyl_Group_Synthesis                 | dxs2          | deoxy xylulose synthase2                            | dxs2, CL732_-1, deoxy xylulose synthase2                                                                                                                                                          | GRMZM2G493395           | 1-deoxy-D-xylulose 5-phosphate synthase                | 7                    | 14,077,852             | 14,081,075            |
| Prenyl_Group_Synthesis                 | dxs3          | deoxy xylulose synthase3                            | dxs3, pco071268                                                                                                                                                                                   | GRMZM2G173641           | 1-deoxy-D-xylulose 5-phosphate synthase                | 9                    | 20,462,059             | 20,467,072            |
| Prenyl_Group_Synthesis                 | ggh1          | geranylgeranyl hydrogenase1                         | ggh1                                                                                                                                                                                              | GRMZM2G105644           | geranylgeranyl reductase                               | 5                    | 206,890,298            | 206,892,838           |
| Prenyl_Group_Synthesis                 | ggh2          | geranylgeranyl hydrogenase2                         | ggh2                                                                                                                                                                                              | GRMZM2G419111           | geranylgeranyl reductase                               | 3                    | 40,062,008             | 40,064,270            |
| Prenyl_Group_Synthesis                 | ggps1         | geranylgeranyl pyrophosphate synthase1              | ggps1, GGPPS1, ggpps1                                                                                                                                                                             | AC194970.5_FG001        | geranylgeranyl pyrophosphate synthase                  | 2                    | 207,236,995            | 207,238,335           |
| Prenyl_Group_Synthesis                 | ggps2         | geranylgeranyl pyrophosphate synthase2              | ggps2, GGPPS2, ggpps2                                                                                                                                                                             | GRMZM2G102550           | geranylgeranyl pyrophosphate synthase                  | 7                    | 160,531,537            | 160,533,586           |
| Prenyl_Group_Synthesis                 | ggps3         | geranylgeranyl pyrophosphate synthase3              | ggps3, GGPPS3, ggpps3                                                                                                                                                                             | GRMZM2G058404           | geranylgeranyl pyrophosphate synthase                  | 8                    | 6,358,798              | 6,360,117             |
| Prenyl_Group_Synthesis                 | hds1          | hydroxymethylbutenyl diphosphate synthase1          | hds1, 4-hydroxy-3-methylbut-2-en-1-yl diphosphate synthase1, Hydroxymethylbutenyl diphosphate synthase1                                                                                           | GRMZM2G137409           | 4-hydroxy-3-methylbut-2-enyl diphosphate synthase      | 5                    | 182,124,005            | 182,130,631           |
| carotenoid_synthesis_and_degradation   | hyd3          | hydroxylase3                                        | hyd3, crtRB1, beta-carotene hydroxylase 1, CrR-B1, bch2                                                                                                                                           | GRMZM2G152135           | Beta-carotene hydroxylase (non-heme dioxygenase type)  | 10                   | 136,057,100            | 136,060,219           |
| carotenoid_synthesis_and_degradation   | hyd4          | hydroxylase4                                        | hyd4, bch1, crtRB3, HYD1, beta-carotene hydroxylase homolog, BCH1                                                                                                                                 | GRMZM2G164318           | Beta-carotene hydroxylase (non-heme dioxygenase type)  | 2                    | 15,865,938             | 15,868,219            |
| carotenoid_synthesis_and_degradation   | hyd5          | hydroxylase5                                        | hyd5, crtRB5                                                                                                                                                                                      | GRMZM2G382534           | Beta-carotene hydroxylase (non-heme dioxygenase type)  | 9                    | 153,692,212            | 153,694,576           |
| carotenoid_synthesis_and_degradation   | hyd6          | hydroxylase6                                        | hyd6, crtRB2, beta-carotene hydroxylase homolog                                                                                                                                                   | GRMZM2G090051           | Beta-carotene hydroxylase (non-heme dioxygenase type)  | 1                    | 5,380,152              | 5,382,574             |
| carotenoid_synthesis_and_degradation   | hyd7          | hydroxylase7                                        | hyd7, crtRB4, hydroxylase7                                                                                                                                                                        | GRMZM2G163683           | Beta-carotene hydroxylase (non-heme dioxygenase type)  | 4                    | 236,023,117            | 236,025,051           |
| carotenoid_synthesis_and_degradation   | hyd8          | hydroxylase8                                        | hyd8                                                                                                                                                                                              | GRMZM5G826824           | Beta-carotene hydroxylase (non-heme dioxygenase type)  | 1                    | 6,353,416              | 6,354,652             |
| Prenyl_Group_Synthesis                 | ippi1         | isopentenyl pyrophosphate isomerase1                | ippi1, isopentenyl diphosphate isomerase1, isopentenyl pyrophosphate isomerase1                                                                                                                   | GRMZM2G108285           | isopentenyl pyrophosphate isomerase                    | 7                    | 155,559,747            | 155,562,921           |
| Prenyl_Group_Synthesis                 | ippi2         | isopentenyl pyrophosphate isomerase2                | ippi2, isopentenyl pyrophosphate isomerase2, isopentenyl diphosphate isomerase2                                                                                                                   | GRMZM2G145029           | isopentenyl pyrophosphate isomerase                    | 8                    | 104,659,886            | 104,663,941           |
| Prenyl_Group_Synthesis                 | ippi3         | isopentenyl pyrophosphate isomerase3                | ippi3, isopentenyl pyrophosphate isomerase3, isopentenyl diphosphate isomerase3                                                                                                                   | GRMZM2G133082           | isopentenyl pyrophosphate isomerase                    | 6                    | 147,131,116            | 147,136,679           |
| Prenyl_Group_Synthesis                 | lw1           | lemon white1                                        | lw1, luteus17, zebra crossbands7, zb7, zb*-N101, zb*-101, isPH, hydroxymethylbutenyl diphosphate reductase1, hmdr1, hdr1, blt1, blotchedN43, 4-hydroxy-3-methylbut-2-enyl diphosphate reductase1, | GRMZM2G027059           | 4-hydroxy-3-methylbut-2-enyl diphosphate reductase     | 1                    | 272,936,836            | 272,940,502           |

|                                      |       |                                                        |                                                                                                                                                                                                                                           |                  |                                                       |   |             |             |
|--------------------------------------|-------|--------------------------------------------------------|-------------------------------------------------------------------------------------------------------------------------------------------------------------------------------------------------------------------------------------------|------------------|-------------------------------------------------------|---|-------------|-------------|
|                                      |       |                                                        | I17, lemon white1                                                                                                                                                                                                                         |                  |                                                       |   |             |             |
| carotenoid_synthesis_and_degradation | lyce1 | lycopene epsilon cyclase1                              | lyce1, lcyE1, lycE, lcyE, Lcy-E, lycopene epsilon cyclase1                                                                                                                                                                                | GRMZM2G012966    | lycopene epsilon-cyclase                              | 8 | 138,882,594 | 138,889,812 |
| Prenyl_Group_Synthesis               | mecs1 | 2-C-methyl-D-erythritol 2,4-cyclodiphosphate synthase1 | mecs1                                                                                                                                                                                                                                     | GRMZM5G835542    | 2-C-methyl-D-erythritol 2,4-cyclodiphosphate synthase | 4 | 155,830,779 | 155,832,786 |
| Prenyl_Group_Synthesis               | mecs2 | 2-C-methyl-D-erythritol 2,4-cyclodiphosphate synthase2 | mecs2                                                                                                                                                                                                                                     | AC209374.4_FG002 | 2-C-methyl-D-erythritol 2,4-cyclodiphosphate synthase | 5 | 196,279,295 | 196,281,037 |
| carotenoid_synthesis_and_degradation | nced2 | nine-cis-epoxycarotenoid dioxygenase2                  | nced2, NCED2, 9-cis-epoxycarotenoid dioxygenase5a, NCED5a, vp14 homolog                                                                                                                                                                   | GRMZM2G407181    | *9-cis-epoxycarotenoid dioxygenase5a                  | 1 | 174,524,887 | 174,527,795 |
| carotenoid_synthesis_and_degradation | nced3 | nine-cis-epoxycarotenoid dioxygenase3                  | nced3, vp14 homolog, 9-cis-epoxycarotenoid dioxygenase5b, NCED5b, NCED3                                                                                                                                                                   | GRMZM5G858784    | *9-cis-epoxycarotenoid dioxygenase5b                  | 3 | 87,344,791  | 87,346,554  |
| carotenoid_synthesis_and_degradation | nced4 | nine-cis-epoxycarotenoid dioxygenase4                  | nced4, NCED9a, vp14 homolog, 9-cis-epoxycarotenoid dioxygenase9a                                                                                                                                                                          | GRMZM2G408158    | *9-cis-epoxycarotenoid dioxygenase9a                  | 2 | 234,574,835 | 234,576,854 |
| carotenoid_synthesis_and_degradation | nced5 | nine-cis-epoxycarotenoid dioxygenase5                  | nced5, 9-cis-epoxycarotenoid dioxygenase9b, NCED9b, vp14 homolog                                                                                                                                                                          | GRMZM2G417954    | *9-cis-epoxycarotenoid dioxygenase9b                  | 7 | 5,976,197   | 5,978,481   |
| carotenoid_synthesis_and_degradation | nced6 | nine-cis-epoxycarotenoid dioxygenase6                  | nced6, NCED6, Carotenoid cleavage dioxygenase4a, CCD4a                                                                                                                                                                                    | GRMZM2G110192    | *carotenoid cleavage dioxygenase4a                    | 4 | 159,724,032 | 159,726,475 |
| carotenoid_synthesis_and_degradation | nced7 | nine-cis-epoxycarotenoid dioxygenase7                  | nced7, NCED9c, vp14 homolog, 9-cis-epoxycarotenoid dioxygenase9c                                                                                                                                                                          | GRMZM2G330848    | *9-cis-epoxycarotenoid dioxygenase9c                  | 7 | 175,861,745 | 175,863,458 |
| carotenoid_synthesis_and_degradation | nced8 | nine-cis-epoxycarotenoid dioxygenase8                  | nced8, NCED5, Carotenoid cleavage dioxygenase4b, CCD4b                                                                                                                                                                                    | GRMZM2G150363    | *carotenoid cleavage dioxygenase4b                    | 5 | 200,687,176 | 200,689,579 |
| carotenoid_synthesis_and_degradation | nced9 | nine-cis-epoxycarotenoid dioxygenase9                  | nced9, NCED9d, 9-cis-epoxycarotenoid dioxygenase9d                                                                                                                                                                                        | GRMZM5G838285    | *9-cis-epoxycarotenoid dioxygenase9d                  | 5 | 16,850,172  | 16,851,977  |
| carotenoid_synthesis_and_degradation | ps1   | pink scutellum1                                        | ps1, ps*-Mu85-3061-21, lycb1, lcyb1, lcyb, lycB, vp7, ps*-8205, pink scutellum1, lyc1, ps*-85-3288-28                                                                                                                                     | GRMZM5G849107    | lycopene beta-cyclase                                 | 5 | 100,700,176 | 100,702,026 |
| carotenoid_synthesis_and_degradation | psy2  | phytoene synthase2                                     | psy2, csu572, pco131047(641), PCO131047b, phytoene synthase2                                                                                                                                                                              | GRMZM2G149317    | phytoene synthase                                     | 8 | 168,273,042 | 168,276,092 |
| carotenoid_synthesis_and_degradation | vde1  | violaxanthin de-epoxidase1                             | vde1, si605018d09, VDE, violaxanthin de-epoxidase1                                                                                                                                                                                        | GRMZM2G027219    | violaxanthin de-epoxidase                             | 2 | 74,086,504  | 74,089,290  |
| carotenoid_synthesis_and_degradation | vp14  | viviparous14                                           | vp14, NCED1, nine-cis-epoxycarotenoid dioxygenase1, NCED1 homolog, siu95953a(82), siu95953a, viviparous14, umc1218, ufg4                                                                                                                  | GRMZM2G014392    | *9-cis-epoxycarotenoid dioxygenase1                   | 1 | 250,892,567 | 250,895,242 |
| carotenoid_synthesis_and_degradation | vp5   | viviparous5                                            | vp5, viviparous5, MAGI_109001, PZB00718, MAGI_22938, umc1070, phytoene desaturase, L39266, pds*-L39266, PZB00648, PZA02069, CL1803_1, phytoene desaturase, pds1, vp5-8419, y-vp*-8419, y-vp*-83-3101-36, y-vp*-85-3101-36, vp5-83-3101-36 | GRMZM2G410515    | phytoene desaturase                                   | 1 | 17,660,941  | 17,667,054  |
| carotenoid_synthesis_and_degradation | wc1   | white cap1                                             | wc1, ccd1, ZmCCD1, PCO084517, AY106323, IDP700, white cap1                                                                                                                                                                                | GRMZM2G057243    | *carotenoid cleavage dioxygenase1                     | 9 | 152,086,899 | 152,092,882 |
| carotenoid_synthesis_and_degradation | y1    | yellow endosperm1                                      | y1, y1ssr, rs131175743, rs130328408, y4, yellow endosperm1, white1, pb1, Psy1                                                                                                                                                             | GRMZM2G300348    | phytoene synthase                                     | 6 | 82,017,148  | 82,021,007  |
| carotenoid_synthesis_and_degradation | zds1  | zeta carotene desaturase1                              | zds1, zeta carotene desaturase candidate, cl78_1(541), CL78_1                                                                                                                                                                             | GRMZM2G454952    | zeta-carotene desaturase                              | 7 | 17,470,585  | 17,479,020  |
| carotenoid_synthesis_and_degradation | zep1  | zeaxanthin epoxidase1                                  | zep1, fha5, TMR41                                                                                                                                                                                                                         | GRMZM2G127139    | zeaxanthin epoxidase                                  | 2 | 44,440,299  | 44,449,237  |

Genomic information for the 58 *a priori* candidate genes involved in the biosynthesis of isoprenoids and carotenoids, as well as the degradation of carotenoids.

\*Carotenoid cleavage enzymes fall into to major phyletic groups, the carotenoid cleavage dioxygenases (which generally have broad substrate specificity) and the NCED clade, which are involved in ABA synthesis and highly specific for 9-cis-epoxycarotenoids. Note that with the exception of ZmCCD1 and ZmNCED1 (vp14) maize carotenoid cleavage family members have not had their biochemical activities determined. Nomenclature of other maize family members is relative to their most closely related sequence in Arabidopsis but this does not necessarily imply a corresponding biochemical activity for the maize enzyme. Nomenclature is as listed in maizeGDB v3.

Table S3 Genomic Information for the 8 *a priori* Candidate Genes (B)

| <i>a priori</i> candidate gene pathway | MaizeGDB Name | MaizeGDB Full Name        | MaizeGDB Synonym(s)                                                           | RefGen_v2 Gene Model ID | Annotated Gene Function                               | RefGen_v2 Chromosome | RefGen_v2 ORF Start bp | RefGen_v2 ORF Stop bp |
|----------------------------------------|---------------|---------------------------|-------------------------------------------------------------------------------|-------------------------|-------------------------------------------------------|----------------------|------------------------|-----------------------|
| carotenoid_synthesis_and_degradation   | cyp14         | cytochrome P450 14        | cyp14, CYP97C, lutein1, lut1, cytochrome P450-type monooxygenase CYP97C1      | GRMZM2G143202           | CYP97A3, Cytochrome P450 epsilon-ring hydroxylase     | 1                    | 86838334               | 86848726              |
| carotenoid_synthesis_and_degradation   | hyd4          | hydroxylase4              | hyd4, bch1, crtRB3, HYD1, beta-carotene hydroxylase homolog, BCH1             | GRMZM2G164318           | Beta-carotene hydroxylase (non-heme dioxygenase type) | 2                    | 15865938               | 15868219              |
| carotenoid_synthesis_and_degradation   | zep1          | zeaxanthin epoxidase1     | zep1, fha5, TMR41                                                             | GRMZM2G127139           | zeaxanthin epoxidase                                  | 2                    | 44440299               | 44449237              |
| carotenoid_synthesis_and_degradation   | y1            | yellow endosperm1         | y1, y1ssr, rs131175743, rs130328408, y4, yellow endosperm1, white1, pb1, Psy1 | GRMZM2G300348           | phytoene synthase                                     | 6                    | 82017148               | 82021007              |
| carotenoid_synthesis_and_degradation   | zds1          | zeta carotene desaturase1 | zds1, zeta carotene desaturase candidate, cl78_1(541), CL78_1                 | GRMZM2G454952           | zeta-carotene desaturase                              | 7                    | 17470585               | 17479020              |
| carotenoid_synthesis_and_degradation   | lyce1         | lycopene epsilon cyclase1 | lyce1, lcye1, lycE, lcyE, LCY-E, lycopene epsilon cyclase1                    | GRMZM2G012966           | lycopene epsilon-cyclase                              | 8                    | 138882594              | 138889812             |
| carotenoid_synthesis_and_degradation   | wc1           | white cap1                | wc1, ccd1, ZmCCD1, PCO084517, AY106323, IDP700, white cap1                    | GRMZM2G057243           | *carotenoid cleavage dioxygenase1                     | 9                    | 152086899              | 152092882             |
| carotenoid_synthesis_and_degradation   | hyd3          | hydroxylase3              | hyd3, crtRB1, beta-carotene hydroxylase 1, CrtR-B1, bch2                      | GRMZM2G152135           | Beta-carotene hydroxylase (non-heme dioxygenase type) | 10                   | 136057100              | 136060219             |

Genomic information for the eight candidate genes that are hypothesized to be critical for marker-assisted selection for orange-colored maize kernels with high total carotenoid and provitamin A levels.

\*Carotenoid cleavage enzymes fall into to major phyletic groups, the carotenoid cleavage dioxygenases (which generally have broad substrate specificity) and the NCED clade, which are involved in ABA synthesis and highly specific for 9-cis-epoxycarotenoids. Note that with the exception of ZmCCD1 and ZmNCED1 (vp14) maize carotenoid cleavage family membes have not had their biochemical activities determined. Nomenclature of other maize family members is relative to their most closely related sequencein Arabidopsis but this does not necessarily imply a corresponding biochemical activity for the maize enzyme. Nomenclature is as listed in maizeGDB v3.
