# Supplementary material
Source: PubMed Central journal article supplement (PMC4256781)
Supplement: supp_114.169979_TableS4.pdf [file supp_114.169979_TableS4.pdf]

Table S4 Genomic Prediction Model Specifications

| GP Method            | Parameters     | Script details                                                                                                             |
|----------------------|----------------|----------------------------------------------------------------------------------------------------------------------------|
| RR-BLUP <sup>a</sup> | K = "RR"       | Kinship.blup function in <a href="#">RR-BLUP R package</a> : Jeff Endelman, 2011                                           |
| LASSO <sup>b</sup>   | $\alpha = 1$   | cv.glmnet and predict functions in <a href="#">GLMNet R package</a> : Jerome Friedman, Trevor Hastie, Rob Tibshirani, 2009 |
| Elastic net          | $\alpha = 0.8$ |                                                                                                                            |

<sup>a</sup>RR-BLUP, Ridge regression best linear unbiased prediction

<sup>b</sup>LASSO, Least absolute shrinkage and selection operator

<sup>c</sup>GLMNet, Lasso and elastic net regularized generalized linear models
