# Supplementary material
Source: PubMed Central journal article supplement (PMC4256781)
Supplement: supp_114.169979_TableS5.pdf [file supp_114.169979_TableS5.pdf]

**Table S5 BLUPs and Heritabilities for 9 Carotenoid Traits**

| Trait                                        | No. Lines | BLUPs |                   |              | Heritabilities |                   |
|----------------------------------------------|-----------|-------|-------------------|--------------|----------------|-------------------|
|                                              |           | Mean  | S.D. <sup>a</sup> | Range        | Estimate       | S.E. <sup>b</sup> |
| Phytofluene                                  | 199       | 0.90  | 0.42              | 0.20 - 2.22  | 0.65           | 0.058             |
| ζ-Carotene                                   | 200       | 0.62  | 0.25              | 0.28 - 1.61  | 0.45           | 0.067             |
| Tetrahydrolycopene                           | 197       | 0.24  | 0.07              | -0.06 - 0.52 | 0.60           | 0.067             |
| Total β-Xanthophylls                         | 195       | 14.10 | 7.62              | 0.89 - 35.95 | 0.96           | 0.006             |
| Total α-Xanthophylls                         | 200       | 12.07 | 5.40              | 1.50- 28.02  | 0.91           | 0.013             |
| Provitamin A <sup>c</sup> /Total Carotenoids | 199       | 0.07  | 0.03              | 0.02 - 0.20  | 0.86           | 0.023             |
| Acyclic Carotenes/Cyclic Carotenes           | 190       | 0.08  | 0.06              | 0 - 0.30     | 0.74           | 0.028             |
| β-Carotene/(β-Cryptoxanthin+Zeaxanthin)      | 196       | 0.10  | 0.06              | 0.03 - 0.38  | 0.93           | 0.015             |
| Total Carotenes/Total Xanthophylls           | 190       | 0.15  | 0.05              | 0 - 0.32     | 0.62           | 0.056             |

Means and ranges (μg/g) for untransformed best linear unbiased predictors (BLUPs) of an additional 9 carotenoid grain traits evaluated on a maize inbred association panel, and estimated heritability on a line mean basis in two summer environments, in West Lafayette, IN, across two years.

<sup>a</sup>S.D., Standard deviation.

<sup>b</sup>S.E., Standard error.

<sup>c</sup>Provitamin A is calculated as the sum of β-carotene, ½ α-carotene and ½ β-cryptoxanthin.
