# Supplementary material
Source: PubMed Central journal article supplement (PMC4256781)
Supplement: supp_114.169979_TableS6.pdf [file supp_114.169979_TableS6.pdf]

Table S6 Correlation Matrix for Untransformed BLUPs of the 24 Carotenoid Traits

|                                                            | $\beta$ -carotene | $\beta$ -cryptoxanthin | Zeaxanthin | $\alpha$ -carotene | Zeinoxanthin | Lutein | Acyclic and Monocyclic Carotenes | Total Carotenoids | $\beta$ -Carotenoids / $\alpha$ -Carotenoids | $\beta$ -Xanthophylls/ $\alpha$ -Xanthophylls | $\beta$ -Carotene/ $\beta$ -Cryptoxanthin | $\beta$ -Cryptoxanthin / Zeaxanthin | $\alpha$ -Carotene/Zeaxanthin | Zeinoxanthin/Lutein | Phytofluene | $\zeta$ -Carotene | Tetrahydrocyclopene | Total $\beta$ -Xanthophylls | Total $\alpha$ -Xanthophylls | Provitamin A* | Provitamin A* / Total Carotenoids | Acyclic Carotenes / Cyclic Carotenes | $\beta$ -Carotene / ( $\beta$ -Cryptoxanthin + Zeaxanthin) | Total Carotenes / Total Xanthophylls |
|------------------------------------------------------------|-------------------|------------------------|------------|--------------------|--------------|--------|----------------------------------|-------------------|----------------------------------------------|-----------------------------------------------|-------------------------------------------|-------------------------------------|-------------------------------|---------------------|-------------|-------------------|---------------------|-----------------------------|------------------------------|---------------|-----------------------------------|--------------------------------------|------------------------------------------------------------|--------------------------------------|
| $\beta$ -carotene                                          |                   | 0.43                   | 0.38       | 0.37               | 0.03         | -0.02  | 0.55                             | 0.43              | 0.28                                         | 0.26                                          | 0.31                                      | 0.18                                | <0.01                         | 0.06                | 0.05        | -0.09             | -0.05               | 0.40                        | 0.01                         | 0.89          | 0.74                              | -0.18                                | 0.53                                                       | 0.35                                 |
| $\beta$ -cryptoxanthin                                     | <0.01             |                        | 0.63       | <0.01              | 0.25         | -0.17  | 0.16                             | 0.58              | 0.54                                         | 0.60                                          | -0.38                                     | 0.51                                | -0.34                         | 0.38                | -0.08       | -0.02             | -0.12               | 0.73                        | -0.09                        | 0.71          | 0.42                              | -0.23                                | -0.07                                                      | -0.17                                |
| Zeaxanthin                                                 | <0.01             | <0.01                  |            | -0.06              | <0.01        | -0.09  | 0.24                             | 0.71              | 0.65                                         | 0.71                                          | -0.23                                     | -0.07                               | -0.10                         | 0.05                | 0.09        | <0.01             | -0.19               | 0.99                        | -0.10                        | 0.51          | 0.10                              | -0.13                                | -0.27                                                      | -0.22                                |
| $\alpha$ -carotene                                         | <0.01             | 0.95                   | 0.38       |                    | 0.34         | 0.53   | 0.62                             | 0.38              | -0.33                                        | -0.32                                         | 0.24                                      | 0.20                                | 0.11                          | 0.16                | 0.13        | 0.19              | -0.03               | -0.05                       | 0.58                         | 0.44          | 0.27                              | -0.02                                | 0.43                                                       | 0.34                                 |
| Zeinoxanthin                                               | 0.67              | <0.01                  | 0.99       | <0.01              |              | 0.35   | 0.22                             | 0.31              | -0.19                                        | -0.20                                         | -0.16                                     | 0.42                                | -0.48                         | 0.70                | 0.03        | 0.08              | 0.03                | 0.04                        | 0.49                         | 0.23          | 0.06                              | -0.08                                | 0.01                                                       | -0.04                                |
| Lutein                                                     | 0.80              | 0.01                   | 0.20       | <0.01              | <0.01        |        | 0.36                             | 0.40              | -0.56                                        | -0.57                                         | 0.02                                      | 0.04                                | 0.02                          | <0.01               | 0.24        | 0.18              | 0.01                | -0.09                       | 0.97                         | 0.03          | -0.26                             | 0.05                                 | 0.10                                                       | 0.11                                 |
| Acyclic and Monocyclic Carotenes                           | <0.01             | 0.02                   | <0.01      | <0.01              | <0.01        | <0.01  |                                  | 0.62              | -0.01                                        | -0.06                                         | 0.16                                      | 0.13                                | 0.03                          | 0.15                | 0.56        | 0.50              | 0.02                | 0.24                        | 0.38                         | 0.57          | 0.33                              | 0.32                                 | 0.37                                                       | 0.44                                 |
| Total Carotenoids                                          | <0.01             | <0.01                  | <0.01      | <0.01              | <0.01        | <0.01  | <0.01                            |                   | 0.25                                         | 0.22                                          | -0.21                                     | 0.20                                | -0.18                         | 0.24                | 0.27        | 0.30              | -0.12               | 0.72                        | 0.45                         | 0.62          | 0.11                              | -0.02                                | -0.08                                                      | -0.02                                |
| $\beta$ -Carotenoids/ $\alpha$ -Carotenoids                | <0.01             | <0.01                  | <0.01      | <0.01              | 0.01         | <0.01  | 0.93                             | <0.01             |                                              | 0.97                                          | -0.17                                     | 0.04                                | -0.10                         | 0.06                | -0.15       | -0.06             | -0.04               | 0.65                        | -0.55                        | 0.36          | 0.29                              | -0.13                                | -0.14                                                      | -0.16                                |
| $\beta$ -Xanthophylls/ $\alpha$ -Xanthophylls              | <0.01             | <0.01                  | <0.01      | <0.01              | <0.01        | <0.01  | 0.40                             | <0.01             | <0.01                                        |                                               | -0.20                                     | <0.01                               | -0.08                         | -0.03               | -0.09       | -0.08             | -0.14               | 0.71                        | -0.56                        | 0.35          | 0.22                              | -0.11                                | -0.20                                                      | -0.19                                |
| $\beta$ -Carotene/ $\beta$ -Cryptoxanthin                  | <0.01             | <0.01                  | <0.01      | <0.01              | 0.03         | 0.74   | 0.02                             | <0.01             | 0.01                                         | <0.01                                         |                                           | -0.27                               | 0.25                          | -0.20               | -0.08       | -0.13             | 0.11                | -0.27                       | -0.01                        | 0.08          | 0.27                              | <0.01                                | 0.57                                                       | 0.31                                 |
| $\beta$ -Cryptoxanthin/Zeaxanthin                          | 0.01              | <0.01                  | 0.35       | <0.01              | <0.01        | 0.55   | 0.07                             | <0.01             | 0.56                                         | 0.98                                          | <0.01                                     |                                     | -0.35                         | 0.48                | -0.04       | 0.03              | -0.01               | 0.03                        | 0.16                         | 0.36          | 0.41                              | -0.06                                | 0.15                                                       | 0.13                                 |
| $\alpha$ -Carotene/Zeaxanthin                              | 0.97              | <0.01                  | 0.17       | 0.10               | <0.01        | 0.80   | 0.62                             | 0.01              | 0.16                                         | 0.25                                          | <0.01                                     | <0.01                               |                               | -0.48               | 0.06        | -0.02             | -0.01               | -0.14                       | -0.08                        | -0.14         | -0.07                             | 0.03                                 | 0.10                                                       | 0.20                                 |
| Zeinoxanthin/Lutein                                        | 0.38              | <0.01                  | 0.51       | 0.03               | <0.01        | 0.95   | 0.03                             | <0.01             | 0.43                                         | 0.64                                          | <0.01                                     | <0.01                               | <0.01                         |                     | -0.03       | 0.08              | 0.02                | 0.08                        | 0.14                         | 0.24          | 0.24                              | -0.09                                | -0.01                                                      | -0.07                                |
| Phytofluene                                                | 0.50              | 0.24                   | 0.21       | 0.07               | 0.70         | <0.01  | <0.01                            | <0.01             | 0.03                                         | 0.20                                          | 0.25                                      | 0.60                                | 0.41                          | 0.64                |             | 0.42              | -0.10               | 0.07                        | 0.25                         | -0.02         | -0.14                             | 0.48                                 | 0.05                                                       | 0.29                                 |
| $\zeta$ -Carotene                                          | 0.21              | 0.75                   | 0.98       | 0.01               | 0.28         | 0.01   | <0.01                            | <0.01             | 0.39                                         | 0.26                                          | 0.07                                      | 0.63                                | 0.76                          | 0.26                | <0.01       |                   | -0.16               | <0.01                       | 0.20                         | -0.07         | -0.15                             | 0.42                                 | -0.03                                                      | 0.20                                 |
| Tetrahydrocyclopene                                        | 0.45              | 0.08                   | 0.01       | 0.67               | 0.67         | 0.90   | 0.79                             | 0.08              | 0.59                                         | 0.05                                          | 0.14                                      | 0.87                                | 0.93                          | 0.73                | 0.16        | 0.02              |                     | -0.19                       | -0.02                        | -0.09         | 0.04                              | 0.08                                 | 0.07                                                       | 0.07                                 |
| Total $\beta$ -Xanthophylls                                | <0.01             | <0.01                  | <0.01      | 0.49               | 0.62         | 0.19   | <0.01                            | <0.01             | <0.01                                        | <0.01                                         | <0.01                                     | 0.66                                | 0.05                          | 0.23                | 0.34        | 0.96              | 0.01                |                             | -0.08                        | 0.57          | 0.15                              | -0.15                                | -0.25                                                      | -0.21                                |
| Total $\alpha$ -Xanthophylls                               | 0.91              | 0.20                   | 0.18       | <0.01              | <0.01        | <0.01  | <0.01                            | <0.01             | <0.01                                        | <0.01                                         | 0.90                                      | 0.03                                | 0.25                          | 0.04                | <0.01       | <0.01             | 0.73                | 0.25                        |                              | 0.09          | -0.22                             | 0.07                                 | 0.10                                                       | 0.11                                 |
| Provitamin A*                                              | <0.01             | <0.01                  | <0.01      | <0.01              | <0.01        | 0.64   | <0.01                            | <0.01             | <0.01                                        | <0.01                                         | 0.23                                      | <0.01                               | 0.05                          | <0.01               | 0.80        | 0.33              | 0.19                | <0.01                       | 0.19                         |               | 0.74                              | -0.25                                | 0.39                                                       | 0.16                                 |
| Provitamin A* / Total Carotenoids                          | <0.01             | <0.01                  | 0.18       | <0.01              | 0.39         | <0.01  | <0.01                            | 0.12              | <0.01                                        | <0.01                                         | <0.01                                     | <0.01                               | 0.30                          | <0.01               | 0.04        | 0.03              | 0.58                | 0.03                        | <0.01                        | <0.01         |                                   | -0.34                                | 0.63                                                       | 0.31                                 |
| Acyclic Carotenes / Cyclic Carotenes                       | 0.01              | <0.01                  | 0.06       | 0.81               | 0.28         | 0.50   | <0.01                            | 0.81              | 0.07                                         | 0.11                                          | 0.95                                      | 0.40                                | 0.62                          | 0.19                | <0.01       | <0.01             | 0.27                | 0.03                        | 0.29                         | <0.01         | <0.01                             |                                      | -0.10                                                      | 0.39                                 |
| $\beta$ -Carotene / ( $\beta$ -Cryptoxanthin + Zeaxanthin) | <0.01             | 0.36                   | <0.01      | <0.01              | 0.88         | 0.17   | <0.01                            | 0.25              | 0.04                                         | 0.01                                          | <0.01                                     | 0.03                                | 0.14                          | 0.85                | 0.47        | 0.65              | 0.35                | <0.01                       | 0.16                         | <0.01         | <0.01                             | 0.16                                 |                                                            | 0.66                                 |
| Total Carotenes / Total Xanthophylls                       | <0.01             | 0.02                   | <0.01      | <0.01              | 0.61         | 0.12   | <0.01                            | 0.80              | 0.02                                         | 0.01                                          | <0.01                                     | 0.07                                | <0.01                         | 0.31                | <0.01       | <0.01             | 0.32                | <0.01                       | 0.11                         | 0.02          | <0.01                             | <0.01                                | <0.01                                                      |                                      |

Pearson correlation coefficients are presented in the upper triangle, and the *P*-values for the significance of associations are in the lower triangle.

\*Provitamin A is calculated as the sum of  $\beta$ -carotene,  $\frac{1}{2}$   $\alpha$ -carotene and  $\frac{1}{2}$   $\beta$ -cryptoxanthin.
