# Supplementary material
Source: PubMed Central journal article supplement (PMC4256781)
Supplement: supp_114.169979_TableS7.pdf [file supp_114.169979_TableS7.pdf]

Table S7 Variance Component Estimates from Mixed Linear Models Fitted to 24 Grain Carotenoid Traits

|                     | Trait                                   | Genetic Variance Component | Environmental Variance Component | GxE <sup>a</sup> Variance Component |
|---------------------|-----------------------------------------|----------------------------|----------------------------------|-------------------------------------|
| 15 priority traits  | Lutein                                  | 24.8787                    | 1.5973                           | 1.5368                              |
|                     | Zeinoxanthin                            | 2.0509                     | 0.2717                           | 0.0286                              |
|                     | α-Carotene                              | 0.2446                     | 0.7396                           | 0.0317                              |
|                     | α-Carotene/Zeinoxanthin                 | 4.0856                     | 0.4429                           | 1.3267                              |
|                     | Zeinoxanthin/Lutein                     | 0.0137                     | 0.0018                           | 0.0142                              |
|                     | Zeaxanthin                              | 58.1510                    | 3.6651                           | 0.0000                              |
|                     | β-Cryptoxanthin                         | 1.4692                     | 0.0741                           | 0.0691                              |
|                     | β-Carotene                              | 0.5365                     | 0.1189                           | 0.1785                              |
|                     | β-Cryptoxanthin/Zeaxanthin              | 0.0099                     | 0.0011                           | 0.0015                              |
|                     | β-Carotene/β-Cryptoxanthin              | 0.6497                     | 0.0792                           | 0.5125                              |
|                     | Total Carotenoids                       | 129.6260                   | 12.7090                          | 0.0000                              |
|                     | Acyclic and Monocyclic Carotenes        | 2.3351                     | 1.7549                           | 0.4304                              |
|                     | β-Xanthophylls/α-Xanthophylls           | 25.9938                    | 5.3756                           | 0.0000                              |
|                     | Provitamin A                            | 1.5758                     | 0.3941                           | 0.2488                              |
|                     | β-Carotenoids/α-Carotenoids             | 1.9802                     | 0.0337                           | 0.0000                              |
| 9 additional traits | ζ-Carotene                              | 0.1592                     | 0.1985                           | 0.0697                              |
|                     | Phytofluene                             | 0.2827                     | 0.1545                           | 0.1323                              |
|                     | Tetrahydrolycopene                      | 0.0157                     | 0.0103                           | 0.0223                              |
|                     | Total β-Xanthophylls                    | 74.3102                    | 3.3002                           | 0.0000                              |
|                     | Total α-Xanthophylls                    | 35.2877                    | 3.3811                           | 0.0000                              |
|                     | Provitamin A/Total Carotenoids          | 0.0017                     | 0.0003                           | 0.0001                              |
|                     | β-Carotene/(β-Cryptoxanthin+Zeaxanthin) | 0.0086                     | 0.0007                           | 0.0005                              |
|                     | Acyclic Carotenes/Cyclic Carotenes      | 0.0047                     | 0.0017                           | 0.0000                              |
|                     | Total Carotenoids/Total Xanthophylls    | 0.0053                     | 0.0002                           | 0.0031                              |

Variance component estimates from mixed linear models fitted to each of the 24 maize grain traits. These mixed liner models included random effects accounting for genotype, environment, and their interaction.

<sup>a</sup>GxE, The variance component accounting for the interaction between genotype and environment.
