# Supplementary material
Source: PubMed Central journal article supplement (PMC4256781)
Supplement: supp_114.169979_TableS8.pdf [file supp_114.169979_TableS8.pdf]

Table S8 Genome-wide Association Study Results with No Covariates (A)

| <i>a priori</i> candidate gene pathway | RefGen_v2 Gene ID | Annotated gene containing associated SNP or gene within 3kb of associated SNP | Trait                                         | SNP ID           | SNP Source         | Chr | Position in RefGen_v2 | P-value  | FDR-Adjusted P-value | Minor Allele Frequency (MAF) | Sample Size | MAF Tropical (8% of 201 Lines) | MAF Temperate (92% of 201 Lines) | R-square_LR from Model without SNP | R-square_LR from Model with SNP | Effect Size | Lambda from Box-Cox Procedure | Back-Transformed Effect Estimates |
|----------------------------------------|-------------------|-------------------------------------------------------------------------------|-----------------------------------------------|------------------|--------------------|-----|-----------------------|----------|----------------------|------------------------------|-------------|--------------------------------|----------------------------------|------------------------------------|---------------------------------|-------------|-------------------------------|-----------------------------------|
| Carotenoid Synthesis and Degradation   | GRMZM2G143202     | lut1                                                                          | $\alpha$ -Carotene/Zeinoxanthin               | ss196425306      | 55K                | 1   | 86,844,203            | 3.47E-10 | 3.36E-05             | 0.31                         | 196         | 0.40                           | 0.28                             | 0.17                               | 0.35                            | 0.06        | -0.25                         | -0.22                             |
| Carotenoid Synthesis and Degradation   | GRMZM2G143202     | lut1                                                                          | Zeinoxanthin/Lutein                           | ss196425306      | 55K                | 1   | 86,844,203            | 4.97E-08 | 7.19E-03             | 0.29                         | 195         | 0.40                           | 0.28                             | 0.09                               | 0.24                            | -0.19       | -0.35                         | 0.84                              |
| Carotenoid Synthesis and Degradation   | GRMZM2G143202     | lut1                                                                          | Zeinoxanthin                                  | ss196425306      | 55K                | 1   | 86,844,203            | 8.95E-08 | 1.30E-02             | 0.30                         | 198         | 0.40                           | 0.28                             | 0.10                               | 0.24                            | -0.11       | -0.25                         | 0.62                              |
|                                        |                   |                                                                               | $\alpha$ -Carotene/Zeinoxanthin               | ss196425308      | 55K                | 1   | 86,945,134            | 3.47E-10 | 3.36E-05             | 0.31                         | 196         | 0.40                           | 0.27                             | 0.17                               | 0.35                            | 0.06        | -0.25                         | -0.22                             |
|                                        |                   |                                                                               | Zeinoxanthin/Lutein                           | ss196425308      | 55K                | 1   | 86,945,134            | 4.97E-08 | 7.19E-03             | 0.29                         | 195         | 0.40                           | 0.27                             | 0.09                               | 0.24                            | -0.19       | -0.35                         | 0.84                              |
|                                        |                   |                                                                               | Zeinoxanthin                                  | ss196425308      | 55K                | 1   | 86,945,134            | 8.95E-08 | 1.30E-02             | 0.30                         | 198         | 0.40                           | 0.27                             | 0.10                               | 0.24                            | -0.11       | -0.25                         | 0.62                              |
|                                        |                   |                                                                               | Lutein                                        | S1_96310268      | GBS                | 1   | 96,310,268            | 3.71E-07 | 3.61E-02             | 0.17                         | 200         | 0.06                           | 0.21                             | 0.17                               | 0.28                            | 1.19        | 0.80                          | 1.67                              |
| Carotenoid Synthesis and Degradation   | GRMZM2G127139     | zep1                                                                          | Zeaxanthin                                    | S2_44448432      | GBS                | 2   | 44,448,432            | 2.22E-09 | 3.22E-04             | 0.11                         | 196         | 0.29                           | 0.09                             | 0.05                               | 0.24                            | -0.34       | 0.35                          | -0.69                             |
| Carotenoid Synthesis and Degradation   | GRMZM2G127139     | zep1                                                                          | Total $\beta$ -Xanthophylls                   | S2_44448432      | GBS                | 2   | 44,448,432            | 1.66E-08 | 2.41E-03             | 0.11                         | 195         | 0.29                           | 0.09                             | 0.05                               | 0.22                            | -0.43       | 0.40                          | -0.76                             |
| Carotenoid Synthesis and Degradation   | GRMZM2G127139     | zep1                                                                          | $\beta$ -Xanthophylls/ $\alpha$ -Xanthophylls | S2_44448432      | GBS                | 2   | 44,448,432            | 4.82E-08 | 2.80E-03             | 0.11                         | 196         | 0.29                           | 0.09                             | 0.15                               | 0.29                            | 0.13        | -0.40                         | -0.26                             |
| Carotenoid Synthesis and Degradation   | GRMZM2G127139     | zep1                                                                          | Zeaxanthin                                    | S2_44448438      | GBS                | 2   | 44,448,438            | 2.22E-09 | 3.22E-04             | 0.11                         | 196         | 0.29                           | 0.09                             | 0.05                               | 0.24                            | 0.34        | 0.35                          | 1.31                              |
| Carotenoid Synthesis and Degradation   | GRMZM2G127139     | zep1                                                                          | Total $\beta$ -Xanthophylls                   | S2_44448438      | GBS                | 2   | 44,448,438            | 1.66E-08 | 2.41E-03             | 0.11                         | 195         | 0.29                           | 0.09                             | 0.05                               | 0.22                            | 0.43        | 0.40                          | 1.46                              |
| Carotenoid Synthesis and Degradation   | GRMZM2G127139     | zep1                                                                          | $\beta$ -Xanthophylls/ $\alpha$ -Xanthophylls | S2_44448438      | GBS                | 2   | 44,448,438            | 4.82E-08 | 2.80E-03             | 0.11                         | 196         | 0.29                           | 0.09                             | 0.15                               | 0.29                            | -0.13       | -0.40                         | 0.42                              |
|                                        |                   |                                                                               | Zeaxanthin                                    | S2_44473748      | GBS                | 2   | 44,473,748            | 1.47E-06 | 4.27E-02             | 0.14                         | 196         | 0.25                           | 0.12                             | 0.05                               | 0.17                            | 0.24        | 0.35                          | 0.86                              |
|                                        |                   |                                                                               | $\beta$ -Xanthophylls/ $\alpha$ -Xanthophylls | S2_44473748      | GBS                | 2   | 44,473,748            | 5.21E-06 | 9.00E-02             | 0.14                         | 196         | 0.25                           | 0.12                             | 0.15                               | 0.24                            | -0.09       | -0.40                         | 0.28                              |
|                                        |                   |                                                                               | Zeaxanthin                                    | S2_44473758      | GBS                | 2   | 44,473,758            | 1.47E-06 | 4.27E-02             | 0.14                         | 196         | 0.24                           | 0.12                             | 0.05                               | 0.17                            | -0.24       | 0.35                          | -0.55                             |
|                                        |                   |                                                                               | $\beta$ -Xanthophylls/ $\alpha$ -Xanthophylls | S2_44473758      | GBS                | 2   | 44,473,758            | 5.21E-06 | 9.00E-02             | 0.14                         | 196         | 0.24                           | 0.12                             | 0.15                               | 0.24                            | 0.09        | -0.40                         | -0.20                             |
|                                        |                   |                                                                               | Zeaxanthin                                    | S2_44473801      | GBS                | 2   | 44,473,801            | 1.47E-06 | 4.27E-02             | 0.14                         | 196         | 0.24                           | 0.12                             | 0.05                               | 0.17                            | 0.24        | 0.35                          | 0.86                              |
|                                        |                   |                                                                               | $\beta$ -Xanthophylls/ $\alpha$ -Xanthophylls | S2_44473801      | GBS                | 2   | 44,473,801            | 5.21E-06 | 9.00E-02             | 0.14                         | 196         | 0.24                           | 0.12                             | 0.15                               | 0.24                            | -0.09       | -0.40                         | 0.28                              |
|                                        |                   |                                                                               | $\beta$ -Xanthophylls/ $\alpha$ -Xanthophylls | S2_44474139      | GBS                | 2   | 44,474,139            | 7.57E-06 | 9.64E-02             | 0.14                         | 196         | 0.29                           | 0.13                             | 0.15                               | 0.24                            | 0.09        | -0.40                         | -0.20                             |
|                                        |                   |                                                                               | Zeaxanthin                                    | S2_44474308      | GBS                | 2   | 44,474,308            | 1.19E-06 | 4.27E-02             | 0.21                         | 196         | 0.38                           | 0.28                             | 0.05                               | 0.17                            | 0.21        | 0.35                          | 0.73                              |
|                                        |                   |                                                                               | $\beta$ -Xanthophylls/ $\alpha$ -Xanthophylls | S2_44474308      | GBS                | 2   | 44,474,308            | 7.03E-06 | 9.64E-02             | 0.21                         | 196         | 0.38                           | 0.28                             | 0.15                               | 0.24                            | -0.08       | -0.40                         | 0.24                              |
|                                        |                   |                                                                               | Zeaxanthin                                    | S3_169734997     | GBS                | 3   | 169,734,997           | 1.16E-06 | 4.27E-02             | 0.06                         | 196         | 0.25                           | 0.07                             | 0.05                               | 0.17                            | -0.42       | 0.35                          | -0.79                             |
|                                        |                   |                                                                               | Total $\beta$ -Xanthophylls                   | S3_169734997     | GBS                | 3   | 169,734,997           | 1.04E-06 | 5.00E-02             | 0.06                         | 195         | 0.25                           | 0.07                             | 0.05                               | 0.18                            | -0.58       | 0.40                          | -0.89                             |
|                                        |                   |                                                                               | Total $\alpha$ -Xanthophylls                  | ss196456701      | 55K                | 4   | 146,977,283           | 1.00E-06 | 9.76E-02             | 0.12                         | 200         | 0.38                           | 0.08                             | 0.10                               | 0.22                            | -0.87       | 0.70                          | -0.95                             |
|                                        |                   |                                                                               | $\beta$ -Cryptoxanthin                        | S7_13843351      | GBS                | 7   | 13,843,351            | 1.66E-07 | 4.84E-02             | 0.15                         | 199         | 0.10                           | 0.16                             | 0.11                               | 0.24                            | -0.04       | 0.10                          | -0.33                             |
|                                        |                   |                                                                               | Zeinoxanthin                                  | S7_15282645      | GBS                | 7   | 15,282,645            | 2.34E-07 | 2.27E-02             | 0.17                         | 198         | 0.42                           | 0.20                             | 0.10                               | 0.23                            | -0.12       | -0.25                         | 0.65                              |
|                                        |                   |                                                                               | $\beta$ -Xanthophylls/ $\alpha$ -Xanthophylls | ss196477160      | 55K                | 7   | 51,472,566            | 5.57E-06 | 9.00E-02             | 0.43                         | 196         | 0.43                           | 0.43                             | 0.15                               | 0.24                            | 0.07        | -0.40                         | -0.16                             |
|                                        |                   |                                                                               | $\beta$ -Xanthophylls/ $\alpha$ -Xanthophylls | S8_129072699     | GBS                | 8   | 129,072,699           | 6.48E-06 | 9.40E-02             | 0.36                         | 196         | 0.50                           | 0.35                             | 0.15                               | 0.24                            | 0.07        | -0.40                         | -0.15                             |
|                                        |                   |                                                                               | $\beta$ -Xanthophylls/ $\alpha$ -Xanthophylls | S8_129124626     | GBS                | 8   | 129,124,626           | 8.20E-06 | 9.91E-02             | 0.29                         | 196         | 0.27                           | 0.31                             | 0.15                               | 0.24                            | -0.07       | -0.40                         | 0.20                              |
| Carotenoid Synthesis and Degradation   | GRMZM2G012966     | lycE                                                                          | Total $\alpha$ -Xanthophylls                  | <i>lycE</i> 5'TE | Additional Markers | 8   | 138,882,481           | 4.37E-09 | 6.39E-04             | NA                           | NA          | NA                             | NA                               | .10                                | .43                             | NA          | 0.70                          | NA                                |
| Carotenoid Synthesis and Degradation   | GRMZM2G012966     | lycE                                                                          | Lutein                                        | <i>lycE</i> 5'TE | Additional Markers | 8   | 138,882,481           | 1.75E-08 | 2.56E-03             | NA                           | NA          | NA                             | NA                               | .11                                | .49                             | NA          | 0.80                          | NA                                |
| Carotenoid Synthesis and Degradation   | GRMZM2G012966     | lycE                                                                          | $\beta$ -Xanthophylls/ $\alpha$ -Xanthophylls | ss196504160      | 55K                | 8   | 138,882,711           | 1.11E-09 | 1.61E-04             | 0.35                         | 196         | 0.48                           | 0.34                             | 0.15                               | 0.33                            | 0.11        | -0.40                         | -0.22                             |

|                                             |               |      |                                               |                    |                    |   |             |          |          |      |     |      |      |      |      |       |       |       |
|---------------------------------------------|---------------|------|-----------------------------------------------|--------------------|--------------------|---|-------------|----------|----------|------|-----|------|------|------|------|-------|-------|-------|
| <b>Carotenoid Synthesis and Degradation</b> | GRMZM2G012966 | lycE | $\beta$ -Carotenoids/ $\alpha$ -Carotenoids   | ss196504160        | 55K                | 8 | 138,882,711 | 2.08E-09 | 6.00E-04 | 0.36 | 190 | 0.48 | 0.34 | 0.18 | 0.35 | 0.12  | -0.85 | -0.12 |
| <b>Carotenoid Synthesis and Degradation</b> | GRMZM2G012966 | lycE | $\beta$ -Xanthophylls/ $\alpha$ -Xanthophylls | S8_138882711       | GBS                | 8 | 138,882,711 | 8.85E-07 | 2.37E-02 | 0.28 | 196 | 0.41 | 0.30 | 0.15 | 0.26 | -0.09 | -0.40 | 0.25  |
| Carotenoid Synthesis and Degradation        | GRMZM2G012966 | lycE | Total $\beta$ -Xanthophylls                   | ss196504160        | 55K                | 8 | 138,882,711 | 1.36E-06 | 5.61E-02 | 0.35 | 195 | 0.48 | 0.34 | 0.05 | 0.18 | -0.26 | 0.40  | -0.53 |
| Carotenoid Synthesis and Degradation        | GRMZM2G012966 | lycE | Zeaxanthin                                    | ss196504160        | 55K                | 8 | 138,882,711 | 2.30E-06 | 6.05E-02 | 0.35 | 196 | 0.48 | 0.34 | 0.05 | 0.16 | -0.19 | 0.35  | -0.45 |
| <b>Carotenoid Synthesis and Degradation</b> | GRMZM2G012966 | lycE | $\beta$ -Xanthophylls/ $\alpha$ -Xanthophylls | S8_138882747       | GBS                | 8 | 138,882,747 | 8.85E-07 | 2.37E-02 | 0.28 | 196 | 0.41 | 0.30 | 0.15 | 0.26 | -0.09 | -0.40 | 0.25  |
| <b>Carotenoid Synthesis and Degradation</b> | GRMZM2G012966 | lycE | $\beta$ -Xanthophylls/ $\alpha$ -Xanthophylls | S8_138882751       | GBS                | 8 | 138,882,751 | 8.85E-07 | 2.37E-02 | 0.28 | 196 | 0.41 | 0.30 | 0.15 | 0.26 | -0.09 | -0.40 | 0.25  |
| <b>Carotenoid Synthesis and Degradation</b> | GRMZM2G012966 | lycE | $\beta$ -Xanthophylls/ $\alpha$ -Xanthophylls | S8_138882798       | GBS                | 8 | 138,882,798 | 8.99E-07 | 2.37E-02 | 0.31 | 196 | 0.21 | 0.36 | 0.15 | 0.26 | -0.08 | -0.40 | 0.25  |
| <b>Carotenoid Synthesis and Degradation</b> | GRMZM2G012966 | lycE | $\beta$ -Xanthophylls/ $\alpha$ -Xanthophylls | S8_138882897       | GBS                | 8 | 138,882,897 | 9.76E-08 | 4.72E-03 | 0.43 | 196 | 0.12 | 0.44 | 0.15 | 0.28 | -0.08 | -0.40 | 0.25  |
| <b>Carotenoid Synthesis and Degradation</b> | GRMZM2G012966 | lycE | $\beta$ -Carotenoids/ $\alpha$ -Carotenoids   | S8_138882897       | GBS                | 8 | 138,882,897 | 6.03E-08 | 8.70E-03 | 0.44 | 190 | 0.12 | 0.44 | 0.18 | 0.32 | -0.10 | -0.85 | 0.13  |
| Carotenoid Synthesis and Degradation        | GRMZM2G012966 | lycE | $\beta$ -Xanthophylls/ $\alpha$ -Xanthophylls | S8_138883026       | GBS                | 8 | 138,883,026 | 5.90E-06 | 9.00E-02 | 0.40 | 196 | 0.18 | 0.48 | 0.15 | 0.24 | 0.07  | -0.40 | -0.16 |
| Carotenoid Synthesis and Degradation        | GRMZM2G012966 | lycE | $\beta$ -Xanthophylls/ $\alpha$ -Xanthophylls | S8_138883056       | GBS                | 8 | 138,883,056 | 5.90E-06 | 9.00E-02 | 0.40 | 196 | 0.18 | 0.48 | 0.15 | 0.24 | -0.07 | -0.40 | 0.21  |
| <b>Carotenoid Synthesis and Degradation</b> | GRMZM2G012966 | lycE | $\beta$ -Xanthophylls/ $\alpha$ -Xanthophylls | <i>lycE</i> SNP216 | Additional Markers | 8 | 138,883,206 | 5.05E-16 | 1.46E-10 | NA   | NA  | NA   | NA   | .10  | .24  | NA    | -0.40 | NA    |
| <b>Carotenoid Synthesis and Degradation</b> | GRMZM2G012966 | lycE | Total $\alpha$ -Xanthophylls                  | <i>lycE</i> SNP216 | Additional Markers | 8 | 138,883,206 | 4.62E-10 | 1.35E-04 | NA   | NA  | NA   | NA   | .10  | .40  | NA    | 0.70  | NA    |
| <b>Carotenoid Synthesis and Degradation</b> | GRMZM2G012966 | lycE | Lutein                                        | <i>lycE</i> SNP216 | Additional Markers | 8 | 138,883,206 | 6.28E-09 | 1.84E-03 | NA   | NA  | NA   | NA   | .11  | .45  | NA    | 0.80  | NA    |
| <b>Carotenoid Synthesis and Degradation</b> | GRMZM2G012966 | lycE | Total $\beta$ -Xanthophylls                   | <i>lycE</i> SNP216 | Additional Markers | 8 | 138,883,206 | 1.65E-07 | 1.20E-02 | NA   | NA  | NA   | NA   | .06  | .30  | NA    | 0.40  | NA    |
| Carotenoid Synthesis and Degradation        | GRMZM2G012966 | lycE | $\beta$ -Xanthophylls/ $\alpha$ -Xanthophylls | PZB00665.1         | 4K                 | 8 | 138,886,137 | 3.82E-06 | 8.52E-02 | 0.35 | 196 | 0.05 | 0.38 | 0.15 | 0.25 | 0.08  | -0.40 | -0.17 |
| <b>Carotenoid Synthesis and Degradation</b> | GRMZM2G012966 | lycE | $\beta$ -Xanthophylls/ $\alpha$ -Xanthophylls | S8_138888278       | GBS                | 8 | 138,888,278 | 2.52E-08 | 2.44E-03 | 0.47 | 196 | 0.19 | 0.42 | 0.15 | 0.30 | -0.09 | -0.40 | 0.28  |
| <b>Carotenoid Synthesis and Degradation</b> | GRMZM2G012966 | lycE | $\beta$ -Carotenoids/ $\alpha$ -Carotenoids   | S8_138888278       | GBS                | 8 | 138,888,278 | 1.82E-07 | 1.75E-02 | 0.47 | 190 | 0.19 | 0.42 | 0.18 | 0.31 | -0.10 | -0.85 | 0.13  |
|                                             |               |      | $\beta$ -Xanthophylls/ $\alpha$ -Xanthophylls | ss196508843        | 55K                | 8 | 139,143,878 | 8.80E-07 | 2.37E-02 | 0.29 | 196 | 0.38 | 0.26 | 0.15 | 0.26 | 0.08  | -0.40 | -0.18 |
|                                             |               |      | $\beta$ -Carotenoids/ $\alpha$ -Carotenoids   | S8_140192724       | GBS                | 8 | 140,192,724 | 9.64E-07 | 6.95E-02 | 0.34 | 190 | 0.19 | 0.28 | 0.18 | 0.29 | -0.09 | -0.85 | 0.12  |
|                                             |               |      | $\beta$ -Xanthophylls/ $\alpha$ -Xanthophylls | S8_140192724       | GBS                | 8 | 140,192,724 | 3.49E-06 | 8.43E-02 | 0.33 | 196 | 0.19 | 0.28 | 0.15 | 0.25 | -0.08 | -0.40 | 0.22  |
|                                             |               |      | Total $\beta$ -Xanthophylls                   | S8_171705545       | GBS                | 8 | 171,705,545 | 5.15E-07 | 2.98E-02 | 0.10 | 195 | 0.14 | 0.14 | 0.05 | 0.19 | -0.40 | 0.40  | -0.72 |

|                                             |                      |               |                                                |                             |                           |           |                    |                 |                 |             |            |             |             |             |             |              |              |              |
|---------------------------------------------|----------------------|---------------|------------------------------------------------|-----------------------------|---------------------------|-----------|--------------------|-----------------|-----------------|-------------|------------|-------------|-------------|-------------|-------------|--------------|--------------|--------------|
|                                             |                      |               | <b>Zeaxanthin</b>                              | <b>S8_171705545</b>         | <b>GBS</b>                | <b>8</b>  | <b>171,705,545</b> | <b>8.40E-07</b> | <b>4.27E-02</b> | <b>0.11</b> | <b>196</b> | <b>0.14</b> | <b>0.14</b> | <b>0.05</b> | <b>0.17</b> | <b>-0.28</b> | <b>0.35</b>  | <b>-0.61</b> |
|                                             |                      |               | <b>Total β-Xanthophylls</b>                    | <b>S8_171705574</b>         | <b>GBS</b>                | <b>8</b>  | <b>171,705,574</b> | <b>1.61E-07</b> | <b>1.20E-02</b> | <b>0.10</b> | <b>195</b> | <b>0.25</b> | <b>0.13</b> | <b>0.05</b> | <b>0.20</b> | <b>-0.42</b> | <b>0.40</b>  | <b>-0.74</b> |
|                                             |                      |               | <b>Zeaxanthin</b>                              | <b>S8_171705574</b>         | <b>GBS</b>                | <b>8</b>  | <b>171,705,574</b> | <b>2.39E-07</b> | <b>2.31E-02</b> | <b>0.11</b> | <b>196</b> | <b>0.25</b> | <b>0.13</b> | <b>0.05</b> | <b>0.19</b> | <b>-0.29</b> | <b>0.35</b>  | <b>-0.63</b> |
|                                             |                      |               | <b>α-Carotene/Zeaxanthin</b>                   | <b>ss196491114</b>          | <b>55K</b>                | <b>9</b>  | <b>69,215,031</b>  | <b>3.31E-10</b> | <b>3.36E-05</b> | <b>0.31</b> | <b>196</b> | <b>0.37</b> | <b>0.29</b> | <b>0.17</b> | <b>0.35</b> | <b>-0.06</b> | <b>-0.25</b> | <b>0.30</b>  |
|                                             |                      |               | <b>Zeinoxanthin/Lutein</b>                     | <b>ss196491114</b>          | <b>55K</b>                | <b>9</b>  | <b>69,215,031</b>  | <b>9.80E-08</b> | <b>9.46E-03</b> | <b>0.28</b> | <b>195</b> | <b>0.37</b> | <b>0.29</b> | <b>0.09</b> | <b>0.23</b> | <b>0.19</b>  | <b>-0.35</b> | <b>-0.39</b> |
|                                             |                      |               | <b>Zeinoxanthin</b>                            | <b>ss196491114</b>          | <b>55K</b>                | <b>9</b>  | <b>69,215,031</b>  | <b>3.76E-07</b> | <b>2.74E-02</b> | <b>0.30</b> | <b>198</b> | <b>0.37</b> | <b>0.29</b> | <b>0.10</b> | <b>0.23</b> | <b>0.11</b>  | <b>-0.25</b> | <b>-0.34</b> |
|                                             |                      |               | <b>β-Xanthophylls/α-Xanthophylls</b>           | <b>ss196493105</b>          | <b>55K</b>                | <b>9</b>  | <b>118,437,281</b> | <b>7.64E-06</b> | <b>9.64E-02</b> | <b>0.29</b> | <b>196</b> | <b>0.19</b> | <b>0.42</b> | <b>0.15</b> | <b>0.24</b> | <b>-0.09</b> | <b>-0.40</b> | <b>0.25</b>  |
| Carotenoid Synthesis and Degradation        | <b>GRMZM2G152135</b> | <b>crtRB1</b> | <b>β-Carotene/(β-Cryptoxanthin+Zeaxanthin)</b> | <b><i>crtRB1</i> InDel4</b> | <b>Additional Markers</b> | <b>10</b> | <b>136,059,748</b> | <b>2.23E-07</b> | <b>5.10E-02</b> | <b>NA</b>   | <b>NA</b>  | <b>NA</b>   | <b>NA</b>   | <b>.06</b>  | <b>.11</b>  | <b>NA</b>    | <b>-0.25</b> | <b>NA</b>    |
| Carotenoid Synthesis and Degradation        | <b>GRMZM2G152135</b> | <b>crtRB1</b> | <b>β-Carotene/(β-Cryptoxanthin+Zeaxanthin)</b> | <b>ss196501627</b>          | <b>55K</b>                | <b>10</b> | <b>136,060,033</b> | <b>3.51E-07</b> | <b>5.10E-02</b> | <b>0.19</b> | <b>196</b> | <b>0.00</b> | <b>0.22</b> | <b>0.04</b> | <b>0.18</b> | <b>0.12</b>  | <b>-0.25</b> | <b>-0.36</b> |
| <b>Carotenoid Synthesis and Degradation</b> | <b>GRMZM2G152135</b> | <b>crtRB1</b> | <b>Zeaxanthin</b>                              | <b><i>crtRB1</i> 3'TE</b>   | <b>Additional Markers</b> | <b>10</b> | <b>136,061,719</b> | <b>1.11E-06</b> | <b>4.27E-02</b> | <b>NA</b>   | <b>NA</b>  | <b>NA</b>   | <b>NA</b>   | <b>.05</b>  | <b>.17</b>  | <b>NA</b>    | <b>0.35</b>  | <b>NA</b>    |
| Carotenoid Synthesis and Degradation        | <b>GRMZM2G152135</b> | <b>crtRB1</b> | <b>Total β-Xanthophylls</b>                    | <b><i>crtRB1</i> 3'TE</b>   | <b>Additional Markers</b> | <b>10</b> | <b>136,061,719</b> | <b>1.97E-06</b> | <b>7.13E-02</b> | <b>NA</b>   | <b>NA</b>  | <b>NA</b>   | <b>NA</b>   | <b>.06</b>  | <b>.18</b>  | <b>NA</b>    | <b>0.40</b>  | <b>NA</b>    |

Statistically significant results from genome-wide association studies on 24 grain carotenoid traits without any markers tagging peak GWAS signals included as covariates. Markers (Column E) that were significantly associated with the indicated trait (Column D) at 5% false discovery rate (FDR) are demarcated with boldface font and those significant only at 10% FDR without boldface font.

Table S8 Genome-wide Association Study Results with Covariate from *zep1* (B)

| <i>a priori</i><br>candidate<br>gene pathway | RefGen_v2 Gene ID | Annotated<br>gene<br>containing<br>associated<br>SNP or gene<br>within 3kb of<br>associated<br>SNP | Trait                         | SNP ID       | SNP Source | Chr | Position in<br>RefGen_v2 | P-value  | FDR-<br>Adjusted<br>P-value | Minor Allele<br>Frequency<br>(MAF) | Sample<br>Size | MAF<br>Tropical<br>(8% of<br>201<br>Lines) | MAF<br>Temperate<br>(92% of 201<br>Lines) | R-square_LR<br>from Model<br>without SNP | R-square_LR<br>from Model<br>with SNP | Effect<br>Size | Lambda<br>from Box-<br>Cox<br>Procedure | Back-<br>Transformed<br>Effect<br>Estimates |
|----------------------------------------------|-------------------|----------------------------------------------------------------------------------------------------|-------------------------------|--------------|------------|-----|--------------------------|----------|-----------------------------|------------------------------------|----------------|--------------------------------------------|-------------------------------------------|------------------------------------------|---------------------------------------|----------------|-----------------------------------------|---------------------------------------------|
| Carotenoid<br>Synthesis and<br>Degradation   | GRMZM2G143202     | lut1                                                                                               | α-Carotene/Zeaxanthin         | ss196425306  | 55K        | 1   | 86,844,203               | 3.47E-10 | 3.36E-05                    | 0.31                               | 196            | 0.40                                       | 0.28                                      | 0.17                                     | 0.35                                  | 0.06           | -0.25                                   | -0.22                                       |
| Carotenoid<br>Synthesis and<br>Degradation   | GRMZM2G143202     | lut1                                                                                               | Zeinoxanthin/Lutein           | ss196425306  | 55K        | 1   | 86,844,203               | 4.97E-08 | 7.19E-03                    | 0.29                               | 195            | 0.40                                       | 0.28                                      | 0.09                                     | 0.24                                  | -0.19          | -0.35                                   | 0.84                                        |
| Carotenoid<br>Synthesis and<br>Degradation   | GRMZM2G143202     | lut1                                                                                               | Zeinoxanthin                  | ss196425306  | 55K        | 1   | 86,844,203               | 8.95E-08 | 1.30E-02                    | 0.30                               | 198            | 0.40                                       | 0.28                                      | 0.10                                     | 0.24                                  | -0.11          | -0.25                                   | 0.62                                        |
|                                              |                   |                                                                                                    | α-Carotene/Zeaxanthin         | ss196425308  | 55K        | 1   | 86,945,134               | 3.47E-10 | 3.36E-05                    | 0.31                               | 196            | 0.40                                       | 0.27                                      | 0.17                                     | 0.35                                  | 0.06           | -0.25                                   | -0.22                                       |
|                                              |                   |                                                                                                    | Zeinoxanthin/Lutein           | ss196425308  | 55K        | 1   | 86,945,134               | 4.97E-08 | 7.19E-03                    | 0.29                               | 195            | 0.40                                       | 0.27                                      | 0.09                                     | 0.24                                  | -0.19          | -0.35                                   | 0.84                                        |
|                                              |                   |                                                                                                    | Zeinoxanthin                  | ss196425308  | 55K        | 1   | 86,945,134               | 8.95E-08 | 1.30E-02                    | 0.30                               | 198            | 0.40                                       | 0.27                                      | 0.10                                     | 0.24                                  | -0.11          | -0.25                                   | 0.62                                        |
|                                              |                   |                                                                                                    | Lutein                        | S1_96310268  | GBS        | 1   | 96,310,268               | 3.30E-07 | 3.22E-02                    | 0.17                               | 200            | 0.06                                       | 0.21                                      | 0.12                                     | 0.24                                  | 1.23           | 0.80                                    | 1.73                                        |
|                                              |                   |                                                                                                    | β-Carotene/β-Cryptoxanthin    | S2_228979822 | GBS        | 2   | 228,979,822              | 5.38E-07 | 7.85E-02                    | 0.08                               | 198            | 0.30                                       | 0.05                                      | 0.10                                     | 0.22                                  | -0.17          | -0.70                                   | 0.31                                        |
|                                              |                   |                                                                                                    | Total α-Xanthophylls          | ss196456701  | 55K        | 4   | 146,977,283              | 1.00E-06 | 9.76E-02                    | 0.12                               | 200            | 0.38                                       | 0.08                                      | 0.10                                     | 0.22                                  | -0.87          | 0.70                                    | -0.95                                       |
|                                              |                   |                                                                                                    | β-Cryptoxanthin               | S7_13843351  | GBS        | 7   | 13,843,351               | 1.66E-07 | 4.84E-02                    | 0.15                               | 199            | 0.10                                       | 0.16                                      | 0.11                                     | 0.24                                  | -0.04          | 0.10                                    | -0.33                                       |
|                                              |                   |                                                                                                    | Zeinoxanthin                  | S7_15282645  | GBS        | 7   | 15,282,645               | 2.34E-07 | 2.27E-02                    | 0.17                               | 198            | 0.42                                       | 0.20                                      | 0.10                                     | 0.23                                  | -0.12          | -0.25                                   | 0.65                                        |
|                                              |                   |                                                                                                    | β-Xanthophylls/α-Xanthophylls | ss196477156  | 55K        | 7   | 51,471,492               | 1.02E-05 | 7.84E-02                    | 0.40                               | 196            | 0.43                                       | 0.39                                      | 0.29                                     | 0.37                                  | 0.06           | -0.40                                   | -0.14                                       |
|                                              |                   |                                                                                                    | β-Xanthophylls/α-Xanthophylls | ss196477160  | 55K        | 7   | 51,472,566               | 1.06E-06 | 2.56E-02                    | 0.43                               | 196            | 0.43                                       | 0.43                                      | 0.29                                     | 0.38                                  | 0.07           | -0.40                                   | -0.16                                       |
|                                              |                   |                                                                                                    | β-Xanthophylls/α-Xanthophylls | ss196477229  | 55K        | 7   | 51,645,966               | 1.04E-05 | 7.84E-02                    | 0.49                               | 196            | 0.43                                       | 0.49                                      | 0.29                                     | 0.37                                  | -0.06          | -0.40                                   | 0.18                                        |
|                                              |                   |                                                                                                    | β-Xanthophylls/α-Xanthophylls | ss196477237  | 55K        | 7   | 51,806,575               | 1.04E-05 | 7.84E-02                    | 0.49                               | 196            | 0.43                                       | 0.50                                      | 0.29                                     | 0.37                                  | 0.06           | -0.40                                   | -0.14                                       |
|                                              |                   |                                                                                                    | β-Xanthophylls/α-Xanthophylls | ss196477251  | 55K        | 7   | 51,981,502               | 1.04E-05 | 7.84E-02                    | 0.49                               | 196            | 0.43                                       | 0.50                                      | 0.29                                     | 0.37                                  | 0.06           | -0.40                                   | -0.14                                       |
|                                              |                   |                                                                                                    | β-Xanthophylls/α-Xanthophylls | ss196477253  | 55K        | 7   | 51,997,363               | 1.04E-05 | 7.84E-02                    | 0.49                               | 196            | 0.43                                       | 0.49                                      | 0.29                                     | 0.37                                  | 0.06           | -0.40                                   | -0.14                                       |
|                                              |                   |                                                                                                    | β-Xanthophylls/α-Xanthophylls | ss196477265  | 55K        | 7   | 52,248,496               | 1.04E-05 | 7.84E-02                    | 0.49                               | 196            | 0.43                                       | 0.48                                      | 0.29                                     | 0.37                                  | -0.06          | -0.40                                   | 0.18                                        |
|                                              |                   |                                                                                                    | β-Xanthophylls/α-Xanthophylls | ss196477269  | 55K        | 7   | 52,290,305               | 1.04E-05 | 7.84E-02                    | 0.49                               | 196            | 0.43                                       | 0.50                                      | 0.29                                     | 0.37                                  | -0.06          | -0.40                                   | 0.18                                        |
|                                              |                   |                                                                                                    | Total β-Xanthophylls          | S8_27117706  | GBS        | 8   | 27,117,706               | 1.52E-06 | 6.30E-02                    | 0.17                               | 195            | 0.25                                       | 0.17                                      | 0.22                                     | 0.32                                  | -0.29          | 0.40                                    | -0.57                                       |
|                                              |                   |                                                                                                    | Zeaxanthin                    | S8_27117706  | GBS        | 8   | 27,117,706               | 2.00E-06 | 8.27E-02                    | 0.17                               | 196            | 0.25                                       | 0.17                                      | 0.24                                     | 0.33                                  | -0.21          | 0.35                                    | -0.48                                       |
|                                              |                   |                                                                                                    | β-Xanthophylls/α-Xanthophylls | PZB01094.1   | 4K         | 8   | 27,117,892               | 5.82E-06 | 7.04E-02                    | 0.21                               | 196            | 0.29                                       | 0.21                                      | 0.29                                     | 0.37                                  | -0.08          | -0.40                                   | 0.22                                        |
|                                              |                   |                                                                                                    | Total β-Xanthophylls          | S8_27118357  | GBS        | 8   | 27,118,357               | 1.86E-06 | 6.74E-02                    | 0.19                               | 195            | 0.48                                       | 0.18                                      | 0.22                                     | 0.32                                  | -0.27          | 0.40                                    | -0.55                                       |
|                                              |                   |                                                                                                    | Zeaxanthin                    | S8_27118357  | GBS        | 8   | 27,118,357               | 2.91E-06 | 9.36E-02                    | 0.19                               | 196            | 0.48                                       | 0.18                                      | 0.24                                     | 0.33                                  | -0.19          | 0.35                                    | -0.46                                       |
|                                              |                   |                                                                                                    | β-Xanthophylls/α-Xanthophylls | S8_111289041 | GBS        | 8   | 111,289,041              | 3.06E-06 | 4.94E-02                    | 0.40                               | 196            | 0.05                                       | 0.34                                      | 0.29                                     | 0.38                                  | 0.07           | -0.40                                   | -0.16                                       |
|                                              |                   |                                                                                                    | β-Carotenoids/α-Carotenoids   | S8_112713556 | GBS        | 8   | 112,713,556              | 2.23E-06 | 4.28E-02                    | 0.18                               | 189            | 0.27                                       | 0.17                                      | 0.29                                     | 0.38                                  | 0.10           | -0.85                                   | -0.11                                       |
|                                              |                   |                                                                                                    | β-Xanthophylls/α-Xanthophylls | ss196516758  | 55K        | 8   | 112,713,556              | 4.09E-06 | 5.65E-02                    | 0.20                               | 196            | 0.45                                       | 0.17                                      | 0.29                                     | 0.37                                  | -0.08          | -0.40                                   | 0.24                                        |
|                                              |                   |                                                                                                    | β-Carotenoids/α-Carotenoids   | ss196516758  | 55K        | 8   | 112,713,556              | 4.34E-06 | 7.81E-02                    | 0.21                               | 189            | 0.45                                       | 0.17                                      | 0.29                                     | 0.37                                  | -0.09          | -0.85                                   | 0.12                                        |
|                                              |                   |                                                                                                    | β-Xanthophylls/α-Xanthophylls | S8_112713556 | GBS        | 8   | 112,713,556              | 8.41E-06 | 7.84E-02                    | 0.17                               | 196            | 0.27                                       | 0.17                                      | 0.29                                     | 0.37                                  | 0.08           | -0.40                                   | -0.18                                       |
|                                              |                   |                                                                                                    | β-Xanthophylls/α-Xanthophylls | S8_123811152 | GBS        | 8   | 123,811,152              | 1.02E-05 | 7.84E-02                    | 0.18                               | 196            | 0.47                                       | 0.19                                      | 0.29                                     | 0.37                                  | 0.07           | -0.40                                   | -0.16                                       |
|                                              |                   |                                                                                                    | β-Carotenoids/α-Carotenoids   | S8_123811152 | GBS        | 8   | 123,811,152              | 5.18E-06 | 8.78E-02                    | 0.19                               | 189            | 0.47                                       | 0.19                                      | 0.29                                     | 0.37                                  | 0.09           | -0.85                                   | -0.09                                       |
|                                              |                   |                                                                                                    | β-Xanthophylls/α-Xanthophylls | ss196516738  | 55K        | 8   | 124,488,144              | 1.43E-06 | 3.19E-02                    | 0.20                               | 196            | 0.00                                       | 0.24                                      | 0.29                                     | 0.38                                  | -0.09          | -0.40                                   | 0.28                                        |
|                                              |                   |                                                                                                    | β-Carotenoids/α-Carotenoids   | ss196516738  | 55K        | 8   | 124,488,144              | 6.21E-06 | 9.94E-02                    | 0.21                               | 189            | 0.00                                       | 0.24                                      | 0.29                                     | 0.37                                  | -0.10          | -0.85                                   | 0.14                                        |
|                                              |                   |                                                                                                    | β-Xanthophylls/α-Xanthophylls | S8_129072699 | GBS        | 8   | 129,072,699              | 2.05E-06 | 3.88E-02                    | 0.36                               | 196            | 0.50                                       | 0.35                                      | 0.29                                     | 0.38                                  | 0.07           | -0.40                                   | -0.15                                       |
|                                              |                   |                                                                                                    | β-Xanthophylls/α-Xanthophylls | S8_129080393 | GBS        | 8   | 129,080,393              | 5.19E-06 | 6.55E-02                    | 0.47                               | 196            | 0.21                                       | 0.38                                      | 0.29                                     | 0.37                                  | -0.06          | -0.40                                   | 0.17                                        |
|                                              |                   |                                                                                                    | β-Xanthophylls/α-Xanthophylls | S8_129080428 | GBS        | 8   | 129,080,428              | 1.46E-05 | 9.64E-02                    | 0.39                               | 196            | 0.21                                       | 0.49                                      | 0.29                                     | 0.36                                  | -0.06          | -0.40                                   | 0.16                                        |
|                                              |                   |                                                                                                    | β-Xanthophylls/α-Xanthophylls | S8_129122614 | GBS        | 8   | 129,122,614              | 8.88E-06 | 7.84E-02                    | 0.47                               | 196            | 0.20                                       | 0.39                                      | 0.29                                     | 0.37                                  | -0.06          | -0.40                                   | 0.16                                        |
|                                              |                   |                                                                                                    | β-Xanthophylls/α-Xanthophylls | S8_129122646 | GBS        | 8   | 129,122,646              | 8.88E-06 | 7.84E-02                    | 0.47                               | 196            | 0.20                                       | 0.39                                      | 0.29                                     | 0.37                                  | -0.06          | -0.40                                   | 0.16                                        |

|                                      |               |      |                                                                         |                     |                    |          |                    |                 |                 |             |            |             |             |             |             |              |              |              |
|--------------------------------------|---------------|------|-------------------------------------------------------------------------|---------------------|--------------------|----------|--------------------|-----------------|-----------------|-------------|------------|-------------|-------------|-------------|-------------|--------------|--------------|--------------|
|                                      |               |      | $\beta$ -Xanthophylls/ $\alpha$ -Xanthophylls                           | S8_129124046        | GBS                | 8        | 129,124,046        | 3.63E-06        | 5.55E-02        | 0.34        | 196        | 0.50        | 0.35        | 0.29        | 0.37        | 0.06         | -0.40        | -0.14        |
|                                      |               |      | <b><math>\beta</math>-Xanthophylls/<math>\alpha</math>-Xanthophylls</b> | <b>S8_129124626</b> | <b>GBS</b>         | <b>8</b> | <b>129,124,626</b> | <b>2.42E-06</b> | <b>4.13E-02</b> | <b>0.29</b> | <b>196</b> | <b>0.27</b> | <b>0.31</b> | <b>0.29</b> | <b>0.38</b> | <b>-0.07</b> | <b>-0.40</b> | <b>0.19</b>  |
|                                      |               |      | $\beta$ -Xanthophylls/ $\alpha$ -Xanthophylls                           | S8_129135865        | GBS                | 8        | 129,135,865        | 1.45E-05        | 9.64E-02        | 0.32        | 196        | 0.47        | 0.34        | 0.29        | 0.36        | 0.06         | -0.40        | -0.14        |
|                                      |               |      | $\beta$ -Xanthophylls/ $\alpha$ -Xanthophylls                           | S8_129137347        | GBS                | 8        | 129,137,347        | 6.90E-06        | 7.84E-02        | 0.41        | 196        | 0.15        | 0.48        | 0.29        | 0.37        | 0.06         | -0.40        | -0.14        |
|                                      |               |      | $\beta$ -Xanthophylls/ $\alpha$ -Xanthophylls                           | ss196512938         | 55K                | 8        | 129,291,444        | 1.08E-05        | 7.84E-02        | 0.34        | 196        | 0.14        | 0.36        | 0.29        | 0.37        | -0.06        | -0.40        | 0.18         |
|                                      |               |      | $\beta$ -Xanthophylls/ $\alpha$ -Xanthophylls                           | S8_129313857        | GBS                | 8        | 129,313,857        | 1.36E-05        | 9.41E-02        | 0.29        | 196        | 0.05        | 0.34        | 0.29        | 0.36        | -0.07        | -0.40        | 0.19         |
|                                      |               |      | $\beta$ -Xanthophylls/ $\alpha$ -Xanthophylls                           | S8_130513659        | GBS                | 8        | 130,513,659        | 1.31E-05        | 9.27E-02        | 0.14        | 196        | 0.33        | 0.14        | 0.29        | 0.36        | -0.08        | -0.40        | 0.23         |
|                                      |               |      | $\beta$ -Xanthophylls/ $\alpha$ -Xanthophylls                           | S8_130930928        | GBS                | 8        | 130,930,928        | 4.37E-06        | 5.76E-02        | 0.09        | 196        | 0.42        | 0.05        | 0.29        | 0.37        | 0.11         | -0.40        | -0.24        |
|                                      |               |      | <b><math>\beta</math>-Carotenoids/<math>\alpha</math>-Carotenoids</b>   | <b>ss196486757</b>  | <b>55K</b>         | <b>8</b> | <b>131,113,149</b> | <b>2.15E-06</b> | <b>4.28E-02</b> | <b>0.41</b> | <b>189</b> | <b>0.33</b> | <b>0.44</b> | <b>0.29</b> | <b>0.38</b> | <b>-0.08</b> | <b>-0.85</b> | <b>0.10</b>  |
|                                      |               |      | $\beta$ -Xanthophylls/ $\alpha$ -Xanthophylls                           | ss196486757         | 55K                | 8        | 131,113,149        | 7.62E-06        | 7.84E-02        | 0.42        | 196        | 0.33        | 0.44        | 0.29        | 0.37        | -0.06        | -0.40        | 0.17         |
|                                      |               |      | $\beta$ -Xanthophylls/ $\alpha$ -Xanthophylls                           | ss196486759         | 55K                | 8        | 131,124,166        | 1.06E-05        | 7.84E-02        | 0.34        | 196        | 0.19        | 0.36        | 0.29        | 0.37        | -0.06        | -0.40        | 0.17         |
|                                      |               |      | <b><math>\beta</math>-Carotenoids/<math>\alpha</math>-Carotenoids</b>   | <b>S8_131533827</b> | <b>GBS</b>         | <b>8</b> | <b>131,533,827</b> | <b>8.54E-07</b> | <b>3.51E-02</b> | <b>0.30</b> | <b>189</b> | <b>0.13</b> | <b>0.37</b> | <b>0.29</b> | <b>0.39</b> | <b>0.09</b>  | <b>-0.85</b> | <b>-0.10</b> |
|                                      |               |      | $\beta$ -Xanthophylls/ $\alpha$ -Xanthophylls                           | S8_131533827        | GBS                | 8        | 131,533,827        | 3.86E-06        | 5.60E-02        | 0.29        | 196        | 0.13        | 0.37        | 0.29        | 0.37        | 0.07         | -0.40        | -0.16        |
|                                      |               |      | Zeaxanthin                                                              | S8_137047040        | GBS                | 8        | 137,047,040        | 2.68E-06        | 9.36E-02        | 0.32        | 196        | 0.15        | 0.36        | 0.24        | 0.33        | 0.17         | 0.35         | 0.55         |
|                                      |               |      | <b><math>\beta</math>-Xanthophylls/<math>\alpha</math>-Xanthophylls</b> | <b>ss196501608</b>  | <b>55K</b>         | <b>8</b> | <b>138,514,315</b> | <b>2.05E-06</b> | <b>3.88E-02</b> | <b>0.41</b> | <b>196</b> | <b>0.40</b> | <b>0.44</b> | <b>0.29</b> | <b>0.38</b> | <b>-0.07</b> | <b>-0.40</b> | <b>0.19</b>  |
|                                      |               |      | <b><math>\beta</math>-Carotenoids/<math>\alpha</math>-Carotenoids</b>   | <b>ss196501608</b>  | <b>55K</b>         | <b>8</b> | <b>138,514,315</b> | <b>2.06E-06</b> | <b>4.28E-02</b> | <b>0.41</b> | <b>189</b> | <b>0.40</b> | <b>0.44</b> | <b>0.29</b> | <b>0.38</b> | <b>-0.08</b> | <b>-0.85</b> | <b>0.10</b>  |
| Carotenoid Synthesis and Degradation | GRMZM2G012966 | lycE | $\beta$ -Xanthophylls/ $\alpha$ -Xanthophylls                           | <i>lycE</i> 5'TE    | Additional Markers | 8        | 138,882,481        | 7.24E-14        | 2.10E-08        | NA          | 196        | NA          | NA          | .21         | .30         | NA           | -0.40        | NA           |
| Carotenoid Synthesis and Degradation | GRMZM2G012966 | lycE | Total $\alpha$ -Xanthophylls                                            | <i>lycE</i> 5'TE    | Additional Markers | 8        | 138,882,481        | 4.85E-09        | 7.09E-04        | NA          | 200        | NA          | NA          | .09         | .43         | NA           | 0.70         | NA           |
| Carotenoid Synthesis and Degradation | GRMZM2G012966 | lycE | Lutein                                                                  | <i>lycE</i> 5'TE    | Additional Markers | 8        | 138,882,481        | 1.92E-08        | 2.81E-03        | NA          | 200        | NA          | NA          | .11         | .49         | NA           | 0.80         | NA           |
| Carotenoid Synthesis and Degradation | GRMZM2G012966 | lycE | Zeaxanthin                                                              | <i>lycE</i> 5'TE    | Additional Markers | 8        | 138,882,481        | 1.19E-07        | 1.30E-02        | NA          | 196        | NA          | NA          | .24         | .38         | NA           | 0.35         | NA           |
| Carotenoid Synthesis and Degradation | GRMZM2G012966 | lycE | Total $\beta$ -Xanthophylls                                             | <i>lycE</i> 5'TE    | Additional Markers | 8        | 138,882,481        | 3.22E-07        | 2.33E-02        | NA          | 195        | NA          | NA          | .22         | .40         | NA           | 0.40         | NA           |
| Carotenoid Synthesis and Degradation | GRMZM2G012966 | lycE | $\beta$ -Xanthophylls/ $\alpha$ -Xanthophylls                           | ss196504160         | 55K                | 8        | 138,882,711        | 1.32E-10        | 1.91E-05        | 0.35        | 196        | 0.48        | 0.34        | 0.29        | 0.46        | 0.10         | -0.40        | -0.22        |
| Carotenoid Synthesis and Degradation | GRMZM2G012966 | lycE | $\beta$ -Carotenoids/ $\alpha$ -Carotenoids                             | ss196504160         | 55K                | 8        | 138,882,711        | 4.23E-10        | 1.22E-04        | 0.37        | 189        | 0.48        | 0.34        | 0.29        | 0.45        | 0.11         | -0.85        | -0.12        |
| Carotenoid Synthesis and Degradation | GRMZM2G012966 | lycE | $\beta$ -Xanthophylls/ $\alpha$ -Xanthophylls                           | S8_138882711        | GBS                | 8        | 138,882,711        | 2.59E-07        | 7.52E-03        | 0.28        | 196        | 0.41        | 0.30        | 0.29        | 0.40        | -0.08        | -0.40        | 0.24         |
| Carotenoid Synthesis and Degradation | GRMZM2G012966 | lycE | Zeaxanthin                                                              | ss196504160         | 55K                | 8        | 138,882,711        | 1.37E-07        | 1.30E-02        | 0.35        | 196        | 0.48        | 0.34        | 0.24        | 0.36        | -0.19        | 0.35         | -0.45        |
| Carotenoid Synthesis and Degradation | GRMZM2G012966 | lycE | Total $\beta$ -Xanthophylls                                             | ss196504160         | 55K                | 8        | 138,882,711        | 1.19E-07        | 1.73E-02        | 0.35        | 195        | 0.48        | 0.34        | 0.22        | 0.35        | -0.27        | 0.40         | -0.54        |
| Carotenoid Synthesis and Degradation | GRMZM2G012966 | lycE | $\beta$ -Carotenoids/ $\alpha$ -Carotenoids                             | S8_138882711        | GBS                | 8        | 138,882,711        | 1.85E-06        | 4.28E-02        | 0.29        | 189        | 0.41        | 0.30        | 0.29        | 0.38        | -0.09        | -0.85        | 0.11         |
| Carotenoid Synthesis and Degradation | GRMZM2G012966 | lycE | $\beta$ -Xanthophylls/ $\alpha$ -Xanthophylls                           | S8_138882747        | GBS                | 8        | 138,882,747        | 2.59E-07        | 7.52E-03        | 0.28        | 196        | 0.41        | 0.30        | 0.29        | 0.40        | -0.08        | -0.40        | 0.24         |
| Carotenoid Synthesis and Degradation | GRMZM2G012966 | lycE | $\beta$ -Carotenoids/ $\alpha$ -Carotenoids                             | S8_138882747        | GBS                | 8        | 138,882,747        | 1.85E-06        | 4.28E-02        | 0.29        | 189        | 0.41        | 0.30        | 0.29        | 0.38        | -0.09        | -0.85        | 0.11         |
| Carotenoid Synthesis and Degradation | GRMZM2G012966 | lycE | $\beta$ -Xanthophylls/ $\alpha$ -Xanthophylls                           | S8_138882751        | GBS                | 8        | 138,882,751        | 2.59E-07        | 7.52E-03        | 0.28        | 196        | 0.41        | 0.30        | 0.29        | 0.40        | -0.08        | -0.40        | 0.24         |
| Carotenoid Synthesis and Degradation | GRMZM2G012966 | lycE | $\beta$ -Carotenoids/ $\alpha$ -Carotenoids                             | S8_138882751        | GBS                | 8        | 138,882,751        | 1.85E-06        | 4.28E-02        | 0.29        | 189        | 0.41        | 0.30        | 0.29        | 0.38        | -0.09        | -0.85        | 0.11         |
| Carotenoid Synthesis and Degradation | GRMZM2G012966 | lycE | $\beta$ -Xanthophylls/ $\alpha$ -Xanthophylls                           | S8_138882798        | GBS                | 8        | 138,882,798        | 8.75E-08        | 4.68E-03        | 0.31        | 196        | 0.21        | 0.36        | 0.29        | 0.40        | -0.08        | -0.40        | 0.25         |
| Carotenoid Synthesis and Degradation | GRMZM2G012966 | lycE | $\beta$ -Carotenoids/ $\alpha$ -Carotenoids                             | S8_138882798        | GBS                | 8        | 138,882,798        | 4.77E-07        | 2.29E-02        | 0.31        | 189        | 0.21        | 0.36        | 0.29        | 0.39        | -0.09        | -0.85        | 0.12         |

|                                      |               |        |                                                        |                      |                    |    |             |          |          |      |     |      |      |      |      |       |       |       |
|--------------------------------------|---------------|--------|--------------------------------------------------------|----------------------|--------------------|----|-------------|----------|----------|------|-----|------|------|------|------|-------|-------|-------|
| Carotenoid Synthesis and Degradation | GRMZM2G012966 | lycE   | $\beta$ -Xanthophylls/ $\alpha$ -Xanthophylls          | S8_138882897         | GBS                | 8  | 138,882,897 | 1.52E-08 | 1.10E-03 | 0.43 | 196 | 0.12 | 0.44 | 0.29 | 0.42 | -0.08 | -0.40 | 0.24  |
| Carotenoid Synthesis and Degradation | GRMZM2G012966 | lycE   | $\beta$ -Carotenoids/ $\alpha$ -Carotenoids            | S8_138882897         | GBS                | 8  | 138,882,897 | 1.27E-08 | 1.83E-03 | 0.43 | 189 | 0.12 | 0.44 | 0.29 | 0.42 | -0.10 | -0.85 | 0.13  |
| Carotenoid Synthesis and Degradation | GRMZM2G012966 | lycE   | $\beta$ -Xanthophylls/ $\alpha$ -Xanthophylls          | S8_138883026         | GBS                | 8  | 138,883,026 | 1.13E-07 | 4.68E-03 | 0.40 | 196 | 0.18 | 0.48 | 0.29 | 0.40 | 0.08  | -0.40 | -0.17 |
| Carotenoid Synthesis and Degradation | GRMZM2G012966 | lycE   | $\beta$ -Carotenoids/ $\alpha$ -Carotenoids            | S8_138883026         | GBS                | 8  | 138,883,026 | 2.13E-07 | 1.23E-02 | 0.40 | 189 | 0.18 | 0.48 | 0.29 | 0.40 | 0.09  | -0.85 | -0.10 |
| Carotenoid Synthesis and Degradation | GRMZM2G012966 | lycE   | $\beta$ -Xanthophylls/ $\alpha$ -Xanthophylls          | S8_138883056         | GBS                | 8  | 138,883,056 | 1.13E-07 | 4.68E-03 | 0.40 | 196 | 0.18 | 0.48 | 0.29 | 0.40 | -0.08 | -0.40 | 0.23  |
| Carotenoid Synthesis and Degradation | GRMZM2G012966 | lycE   | $\beta$ -Carotenoids/ $\alpha$ -Carotenoids            | S8_138883056         | GBS                | 8  | 138,883,056 | 2.13E-07 | 1.23E-02 | 0.40 | 189 | 0.18 | 0.48 | 0.29 | 0.40 | -0.09 | -0.85 | 0.12  |
| Carotenoid Synthesis and Degradation | GRMZM2G012966 | lycE   | Total $\alpha$ -Xanthophylls                           | <i>lycE</i> SNP216   | Additional Markers | 8  | 138,883,206 | 4.71E-10 | 1.38E-04 | NA   | 200 | NA   | NA   | .09  | .40  | NA    | 0.70  | NA    |
| Carotenoid Synthesis and Degradation | GRMZM2G012966 | lycE   | Zeaxanthin                                             | <i>lycE</i> SNP216   | Additional Markers | 8  | 138,883,206 | 1.57E-09 | 4.54E-04 | NA   | 196 | NA   | NA   | .24  | .39  | NA    | 0.35  | NA    |
| Carotenoid Synthesis and Degradation | GRMZM2G012966 | lycE   | Total $\beta$ -Xanthophylls                            | <i>lycE</i> SNP216   | Additional Markers | 8  | 138,883,206 | 5.83E-09 | 1.69E-03 | NA   | 195 | NA   | NA   | .22  | .40  | NA    | 0.40  | NA    |
| Carotenoid Synthesis and Degradation | GRMZM2G012966 | lycE   | Lutein                                                 | <i>lycE</i> SNP216   | Additional Markers | 8  | 138,883,206 | 6.78E-09 | 1.98E-03 | NA   | 200 | NA   | NA   | .11  | .45  | NA    | 0.80  | NA    |
| Carotenoid Synthesis and Degradation | GRMZM2G012966 | lycE   | $\beta$ -Xanthophylls/ $\alpha$ -Xanthophylls          | PZB00665.1           | 4K                 | 8  | 138,886,137 | 1.03E-05 | 7.84E-02 | 0.35 | 196 | 0.05 | 0.38 | 0.29 | 0.37 | 0.07  | -0.40 | -0.15 |
| Carotenoid Synthesis and Degradation | GRMZM2G012966 | lycE   | $\beta$ -Xanthophylls/ $\alpha$ -Xanthophylls          | S8_138888278         | GBS                | 8  | 138,888,278 | 2.25E-09 | 2.17E-04 | 0.47 | 196 | 0.19 | 0.42 | 0.29 | 0.44 | -0.09 | -0.40 | 0.28  |
| Carotenoid Synthesis and Degradation | GRMZM2G012966 | lycE   | $\beta$ -Carotenoids/ $\alpha$ -Carotenoids            | S8_138888278         | GBS                | 8  | 138,888,278 | 3.13E-08 | 3.01E-03 | 0.47 | 189 | 0.19 | 0.42 | 0.29 | 0.41 | -0.10 | -0.85 | 0.13  |
| Carotenoid Synthesis and Degradation | GRMZM2G012966 | lycE   | Zeaxanthin                                             | S8_138888278         | GBS                | 8  | 138,888,278 | 3.36E-06 | 9.74E-02 | 0.46 | 196 | 0.19 | 0.42 | 0.24 | 0.33 | 0.16  | 0.35  | 0.53  |
|                                      |               |        | $\beta$ -Xanthophylls/ $\alpha$ -Xanthophylls          | ss196508843          | 55K                | 8  | 139,143,878 | 4.62E-07 | 1.22E-02 | 0.29 | 196 | 0.38 | 0.26 | 0.29 | 0.39 | 0.08  | -0.40 | -0.17 |
|                                      |               |        | $\beta$ -Carotenoids/ $\alpha$ -Carotenoids            | ss196508843          | 55K                | 8  | 139,143,878 | 1.95E-06 | 4.28E-02 | 0.31 | 189 | 0.38 | 0.26 | 0.29 | 0.38 | 0.08  | -0.85 | -0.09 |
|                                      |               |        | $\beta$ -Xanthophylls/ $\alpha$ -Xanthophylls          | S8_140192724         | GBS                | 8  | 140,192,724 | 2.14E-06 | 3.88E-02 | 0.33 | 196 | 0.19 | 0.28 | 0.29 | 0.38 | -0.07 | -0.40 | 0.20  |
|                                      |               |        | $\beta$ -Carotenoids/ $\alpha$ -Carotenoids            | S8_140192724         | GBS                | 8  | 140,192,724 | 1.45E-06 | 4.28E-02 | 0.34 | 189 | 0.19 | 0.28 | 0.29 | 0.38 | -0.08 | -0.85 | 0.11  |
|                                      |               |        | Total $\beta$ -Xanthophylls                            | S8_171705545         | GBS                | 8  | 171,705,545 | 7.56E-07 | 3.65E-02 | 0.10 | 195 | 0.14 | 0.14 | 0.22 | 0.33 | -0.36 | 0.40  | -0.67 |
|                                      |               |        | Zeaxanthin                                             | S8_171705545         | GBS                | 8  | 171,705,545 | 1.04E-06 | 5.03E-02 | 0.11 | 196 | 0.14 | 0.14 | 0.24 | 0.34 | -0.25 | 0.35  | -0.56 |
|                                      |               |        | Zeaxanthin                                             | S8_171705574         | GBS                | 8  | 171,705,574 | 2.84E-07 | 1.64E-02 | 0.11 | 196 | 0.25 | 0.13 | 0.24 | 0.35 | -0.26 | 0.35  | -0.58 |
|                                      |               |        | Total $\beta$ -Xanthophylls                            | S8_171705574         | GBS                | 8  | 171,705,574 | 2.31E-07 | 2.23E-02 | 0.10 | 195 | 0.25 | 0.13 | 0.22 | 0.34 | -0.38 | 0.40  | -0.69 |
|                                      |               |        | $\alpha$ -Carotene/Zeaxanthin                          | ss196491114          | 55K                | 9  | 69,215,031  | 3.31E-10 | 3.36E-05 | 0.31 | 196 | 0.37 | 0.29 | 0.17 | 0.35 | -0.06 | -0.25 | 0.30  |
|                                      |               |        | Zeinoxanthin/Lutein                                    | ss196491114          | 55K                | 9  | 69,215,031  | 9.80E-08 | 9.46E-03 | 0.28 | 195 | 0.37 | 0.29 | 0.09 | 0.23 | 0.19  | -0.35 | -0.39 |
|                                      |               |        | Zeinoxanthin                                           | ss196491114          | 55K                | 9  | 69,215,031  | 3.76E-07 | 2.74E-02 | 0.30 | 198 | 0.37 | 0.29 | 0.10 | 0.23 | 0.11  | -0.25 | -0.34 |
| Carotenoid Synthesis and Degradation | GRMZM2G152135 | crtRB1 | $\beta$ -Carotene/( $\beta$ -Cryptoxanthin+Zeaxanthin) | <i>crtRB1</i> InDel4 | Additional Markers | 10 | 136,059,748 | 2.14E-07 | 5.10E-02 | NA   | 196 | NA   | NA   | .04  | .09  | NA    | -0.25 | NA    |
| Carotenoid Synthesis and Degradation | GRMZM2G152135 | crtRB1 | $\beta$ -Carotene/ $\beta$ -Cryptoxanthin              | <i>crtRB1</i> InDel4 | Additional Markers | 10 | 136,059,748 | 5.29E-07 | 7.85E-02 | NA   | 198 | NA   | NA   | .07  | .07  | NA    | -0.70 | NA    |
| Carotenoid Synthesis and Degradation | GRMZM2G152135 | crtRB1 | $\beta$ -Carotene/( $\beta$ -Cryptoxanthin+Zeaxanthin) | ss196501627          | 55K                | 10 | 136,060,033 | 3.51E-07 | 5.10E-02 | 0.19 | 196 | 0.00 | 0.22 | 0.04 | 0.18 | 0.12  | -0.25 | -0.36 |
| Carotenoid Synthesis and Degradation | GRMZM2G152135 | crtRB1 | Zeaxanthin                                             | <i>crtRB1</i> 3'TE   | Additional Markers | 10 | 136,061,719 | 1.79E-07 | 1.30E-02 | NA   | 196 | NA   | NA   | .24  | .31  | NA    | 0.35  | NA    |
| Carotenoid Synthesis and Degradation | GRMZM2G152135 | crtRB1 | Total $\beta$ -Xanthophylls                            | <i>crtRB1</i> 3'TE   | Additional Markers | 10 | 136,061,719 | 7.09E-07 | 3.65E-02 | NA   | 195 | NA   | NA   | .22  | .29  | NA    | 0.40  | NA    |
| Carotenoid Synthesis and Degradation | GRMZM2G152135 | crtRB1 | Total Carotenes/Total Xanthophylls                     | <i>crtRB1</i> 3'TE   | Additional Markers | 10 | 136,061,719 | 1.89E-07 | 5.43E-02 | NA   | 188 | NA   | NA   | .05  | .15  | NA    | -0.55 | NA    |

Statistically significant results from genome-wide association studies on 24 grain carotenoid traits with the peak SNP tagging the GWAS signal from *zep1* included as a covariate. Markers (Column E) that were significantly associated with the indicated trait (Column D) at 5% false discovery rate (FDR) are demarcated with boldface font and those significant only at 10% FDR without boldface font. Note that addition of the significant marker *crtRB1* InDel4 did not improve the partial R-square value of the model for the  $\beta$ -Carotene/ $\beta$ -Cryptoxanthin trait due to taxa that had missing data for the marker state.

Table S8 Genome-wide Association Study Results with Covariate from *lut1* (C)

| <i>a priori</i><br>candidate<br>gene pathway | RefGen_v2 Gene ID | Annotated<br>gene<br>containing<br>associated<br>SNP or gene<br>within 3kb of<br>associated<br>SNP | Trait                                             | SNP ID       | SNP Source | Chr | Position in<br>RefGen_v2 | P-value  | FDR-<br>Adjusted<br>P-value | Minor<br>Allele<br>Frequency<br>(MAF) | Sample<br>Size | MAF<br>Tropical<br>(8% of<br>201 Lines) | MAF<br>Temperate<br>(92% of 201<br>Lines) | R-square_LR<br>from Model<br>without SNP | R-square_LR<br>from Model<br>with SNP | Effect<br>Size | Lambda<br>from Box-<br>Cox<br>Procedure | Back-<br>Transformed<br>Effect<br>Estimates |
|----------------------------------------------|-------------------|----------------------------------------------------------------------------------------------------|---------------------------------------------------|--------------|------------|-----|--------------------------|----------|-----------------------------|---------------------------------------|----------------|-----------------------------------------|-------------------------------------------|------------------------------------------|---------------------------------------|----------------|-----------------------------------------|---------------------------------------------|
|                                              |                   |                                                                                                    | Lutein                                            | S1_96310268  | GBS        | 1   | 96,310,268               | 3.32E-07 | 3.23E-02                    | 0.17                                  | 200            | 0.06                                    | 0.21                                      | 0.12                                     | 0.25                                  | 1.23           | 0.80                                    | 1.73                                        |
| Carotenoid<br>Synthesis and<br>Degradation   | GRMZM2G127139     | zep1                                                                                               | Zeaxanthin                                        | S2_44448432  | GBS        | 2   | 44,448,432               | 2.06E-09 | 2.98E-04                    | 0.11                                  | 196            | 0.29                                    | 0.09                                      | 0.04                                     | 0.24                                  | -0.34          | 0.35                                    | -0.69                                       |
| Carotenoid<br>Synthesis and<br>Degradation   | GRMZM2G127139     | zep1                                                                                               | Total $\beta$ -Xanthophylls                       | S2_44448432  | GBS        | 2   | 44,448,432               | 1.57E-08 | 2.28E-03                    | 0.11                                  | 195            | 0.29                                    | 0.09                                      | 0.05                                     | 0.22                                  | -0.43          | 0.40                                    | -0.76                                       |
| Carotenoid<br>Synthesis and<br>Degradation   | GRMZM2G127139     | zep1                                                                                               | $\beta$ -Xanthophylls/ $\alpha$ -<br>Xanthophylls | S2_44448432  | GBS        | 2   | 44,448,432               | 5.29E-07 | 1.28E-02                    | 0.11                                  | 196            | 0.29                                    | 0.09                                      | 0.11                                     | 0.24                                  | 0.12           | -0.40                                   | -0.24                                       |
| Carotenoid<br>Synthesis and<br>Degradation   | GRMZM2G127139     | zep1                                                                                               | $\beta$ -Carotenoids/ $\alpha$ -Carotenoids       | S2_44448432  | GBS        | 2   | 44,448,432               | 9.29E-07 | 4.88E-02                    | 0.12                                  | 189            | 0.29                                    | 0.09                                      | 0.20                                     | 0.31                                  | 0.13           | -0.85                                   | -0.13                                       |
| Carotenoid<br>Synthesis and<br>Degradation   | GRMZM2G127139     | zep1                                                                                               | Zeaxanthin                                        | S2_44448438  | GBS        | 2   | 44,448,438               | 2.06E-09 | 2.98E-04                    | 0.11                                  | 196            | 0.29                                    | 0.09                                      | 0.04                                     | 0.24                                  | 0.34           | 0.35                                    | 1.31                                        |
| Carotenoid<br>Synthesis and<br>Degradation   | GRMZM2G127139     | zep1                                                                                               | Total $\beta$ -Xanthophylls                       | S2_44448438  | GBS        | 2   | 44,448,438               | 1.57E-08 | 2.28E-03                    | 0.11                                  | 195            | 0.29                                    | 0.09                                      | 0.05                                     | 0.22                                  | 0.43           | 0.40                                    | 1.46                                        |
| Carotenoid<br>Synthesis and<br>Degradation   | GRMZM2G127139     | zep1                                                                                               | $\beta$ -Xanthophylls/ $\alpha$ -<br>Xanthophylls | S2_44448438  | GBS        | 2   | 44,448,438               | 5.29E-07 | 1.28E-02                    | 0.11                                  | 196            | 0.29                                    | 0.09                                      | 0.11                                     | 0.24                                  | -0.12          | -0.40                                   | 0.37                                        |
| Carotenoid<br>Synthesis and<br>Degradation   | GRMZM2G127139     | zep1                                                                                               | $\beta$ -Carotenoids/ $\alpha$ -Carotenoids       | S2_44448438  | GBS        | 2   | 44,448,438               | 9.29E-07 | 4.88E-02                    | 0.12                                  | 189            | 0.29                                    | 0.09                                      | 0.20                                     | 0.31                                  | -0.13          | -0.85                                   | 0.17                                        |
|                                              |                   |                                                                                                    | Zeaxanthin                                        | S2_44473748  | GBS        | 2   | 44,473,748               | 1.32E-06 | 3.82E-02                    | 0.14                                  | 196            | 0.25                                    | 0.12                                      | 0.04                                     | 0.17                                  | 0.24           | 0.35                                    | 0.86                                        |
|                                              |                   |                                                                                                    | $\beta$ -Xanthophylls/ $\alpha$ -<br>Xanthophylls | S2_44473748  | GBS        | 2   | 44,473,748               | 1.65E-05 | 9.94E-02                    | 0.14                                  | 196            | 0.25                                    | 0.12                                      | 0.11                                     | 0.20                                  | -0.09          | -0.40                                   | 0.27                                        |
|                                              |                   |                                                                                                    | Zeaxanthin                                        | S2_44473758  | GBS        | 2   | 44,473,758               | 1.32E-06 | 3.82E-02                    | 0.14                                  | 196            | 0.24                                    | 0.12                                      | 0.04                                     | 0.17                                  | -0.24          | 0.35                                    | -0.55                                       |
|                                              |                   |                                                                                                    | $\beta$ -Xanthophylls/ $\alpha$ -<br>Xanthophylls | S2_44473758  | GBS        | 2   | 44,473,758               | 1.65E-05 | 9.94E-02                    | 0.14                                  | 196            | 0.24                                    | 0.12                                      | 0.11                                     | 0.20                                  | 0.09           | -0.40                                   | -0.19                                       |
|                                              |                   |                                                                                                    | Zeaxanthin                                        | S2_44473801  | GBS        | 2   | 44,473,801               | 1.32E-06 | 3.82E-02                    | 0.14                                  | 196            | 0.24                                    | 0.12                                      | 0.04                                     | 0.17                                  | 0.24           | 0.35                                    | 0.86                                        |
|                                              |                   |                                                                                                    | $\beta$ -Xanthophylls/ $\alpha$ -<br>Xanthophylls | S2_44473801  | GBS        | 2   | 44,473,801               | 1.65E-05 | 9.94E-02                    | 0.14                                  | 196            | 0.24                                    | 0.12                                      | 0.11                                     | 0.20                                  | -0.09          | -0.40                                   | 0.27                                        |
|                                              |                   |                                                                                                    | Zeaxanthin                                        | S2_44474308  | GBS        | 2   | 44,474,308               | 1.09E-06 | 3.82E-02                    | 0.21                                  | 196            | 0.38                                    | 0.28                                      | 0.04                                     | 0.17                                  | 0.21           | 0.35                                    | 0.73                                        |
|                                              |                   |                                                                                                    | $\beta$ -Xanthophylls/ $\alpha$ -<br>Xanthophylls | S2_44474308  | GBS        | 2   | 44,474,308               | 1.55E-05 | 9.94E-02                    | 0.21                                  | 196            | 0.38                                    | 0.28                                      | 0.11                                     | 0.20                                  | -0.08          | -0.40                                   | 0.23                                        |
|                                              |                   |                                                                                                    | Zeaxanthin                                        | S3_169734997 | GBS        | 3   | 169,734,997              | 9.39E-07 | 3.82E-02                    | 0.06                                  | 196            | 0.25                                    | 0.07                                      | 0.04                                     | 0.17                                  | -0.42          | 0.35                                    | -0.79                                       |
|                                              |                   |                                                                                                    | Total $\beta$ -Xanthophylls                       | S3_169734997 | GBS        | 3   | 169,734,997              | 7.99E-07 | 3.85E-02                    | 0.06                                  | 195            | 0.25                                    | 0.07                                      | 0.05                                     | 0.18                                  | -0.58          | 0.40                                    | -0.89                                       |
|                                              |                   |                                                                                                    | $\beta$ -Xanthophylls/ $\alpha$ -<br>Xanthophylls | S3_169734997 | GBS        | 3   | 169,734,997              | 1.53E-05 | 9.94E-02                    | 0.06                                  | 196            | 0.25                                    | 0.07                                      | 0.11                                     | 0.20                                  | 0.16           | -0.40                                   | -0.31                                       |
|                                              |                   |                                                                                                    | Zeaxanthin                                        | S3_172380629 | GBS        | 3   | 172,380,629              | 3.84E-06 | 9.28E-02                    | 0.05                                  | 196            | 0.15                                    | 0.05                                      | 0.04                                     | 0.16                                  | -0.42          | 0.35                                    | -0.78                                       |
|                                              |                   |                                                                                                    | $\beta$ -Xanthophylls/ $\alpha$ -<br>Xanthophylls | ss196415633  | 55K        | 3   | 216,418,000              | 1.11E-05 | 8.55E-02                    | 0.07                                  | 196            | 0.33                                    | 0.04                                      | 0.11                                     | 0.21                                  | 0.12           | -0.40                                   | -0.25                                       |
|                                              |                   |                                                                                                    | $\beta$ -Cryptoxanthin                            | S7_13843351  | GBS        | 7   | 13,843,351               | 3.40E-08 | 9.94E-03                    | 0.15                                  | 199            | 0.10                                    | 0.16                                      | 0.15                                     | 0.29                                  | -0.04          | 0.10                                    | -0.34                                       |
|                                              |                   |                                                                                                    | Zeinoxanthin                                      | S7_15282645  | GBS        | 7   | 15,282,645               | 3.40E-07 | 9.89E-02                    | 0.17                                  | 198            | 0.42                                    | 0.20                                      | 0.25                                     | 0.36                                  | -0.11          | -0.25                                   | 0.57                                        |
|                                              |                   |                                                                                                    | $\beta$ -Xanthophylls/ $\alpha$ -<br>Xanthophylls | ss196477160  | 55K        | 7   | 51,472,566               | 1.69E-05 | 9.94E-02                    | 0.43                                  | 196            | 0.43                                    | 0.43                                      | 0.11                                     | 0.20                                  | 0.07           | -0.40                                   | -0.15                                       |
|                                              |                   |                                                                                                    | $\beta$ -Xanthophylls/ $\alpha$ -<br>Xanthophylls | S8_21700838  | GBS        | 8   | 21,700,838               | 7.67E-06 | 7.92E-02                    | 0.45                                  | 196            | 0.17                                    | 0.38                                      | 0.11                                     | 0.21                                  | -0.07          | -0.40                                   | 0.19                                        |
|                                              |                   |                                                                                                    | $\beta$ -Xanthophylls/ $\alpha$ -<br>Xanthophylls | PZD00025.1   | 4K         | 8   | 22,245,644               | 8.90E-06 | 7.92E-02                    | 0.15                                  | 196            | 0.24                                    | 0.14                                      | 0.11                                     | 0.21                                  | 0.10           | -0.40                                   | -0.21                                       |
|                                              |                   |                                                                                                    | $\beta$ -Xanthophylls/ $\alpha$ -<br>Xanthophylls | S8_27118357  | GBS        | 8   | 27,118,357               | 1.09E-05 | 8.55E-02                    | 0.19                                  | 196            | 0.48                                    | 0.18                                      | 0.11                                     | 0.21                                  | 0.08           | -0.40                                   | -0.18                                       |
|                                              |                   |                                                                                                    | $\beta$ -Xanthophylls/ $\alpha$ -<br>Xanthophylls | ss196485943  | 55K        | 8   | 113,211,580              | 9.06E-06 | 7.92E-02                    | 0.30                                  | 196            | 0.29                                    | 0.25                                      | 0.11                                     | 0.21                                  | -0.07          | -0.40                                   | 0.21                                        |
|                                              |                   |                                                                                                    | $\beta$ -Xanthophylls/ $\alpha$ -<br>Xanthophylls | ss196485947  | 55K        | 8   | 113,283,478              | 5.25E-06 | 6.35E-02                    | 0.10                                  | 196            | 0.38                                    | 0.07                                      | 0.11                                     | 0.21                                  | -0.13          | -0.40                                   | 0.40                                        |
|                                              |                   |                                                                                                    | $\beta$ -Xanthophylls/ $\alpha$ -<br>Xanthophylls | S8_113350643 | GBS        | 8   | 113,350,643              | 1.17E-05 | 8.67E-02                    | 0.10                                  | 196            | 0.47                                    | 0.09                                      | 0.11                                     | 0.21                                  | 0.12           | -0.40                                   | -0.24                                       |
|                                              |                   |                                                                                                    | $\beta$ -Xanthophylls/ $\alpha$ -<br>Xanthophylls | ss196503032  | 55K        | 8   | 120,970,129              | 1.37E-05 | 9.94E-02                    | 0.40                                  | 196            | 0.00                                    | 0.45                                      | 0.11                                     | 0.20                                  | -0.07          | -0.40                                   | 0.19                                        |
|                                              |                   |                                                                                                    | $\beta$ -Xanthophylls/ $\alpha$ -<br>Xanthophylls | ss196503028  | 55K        | 8   | 120,970,146              | 1.73E-05 | 9.94E-02                    | 0.39                                  | 196            | 0.00                                    | 0.44                                      | 0.11                                     | 0.20                                  | 0.07           | -0.40                                   | -0.15                                       |
|                                              |                   |                                                                                                    | $\beta$ -Xanthophylls/ $\alpha$ -<br>Xanthophylls | ss196486295  | 55K        | 8   | 121,437,490              | 1.78E-05 | 9.94E-02                    | 0.33                                  | 196            | 0.00                                    | 0.36                                      | 0.11                                     | 0.20                                  | -0.07          | -0.40                                   | 0.19                                        |
|                                              |                   |                                                                                                    | $\beta$ -Xanthophylls/ $\alpha$ -<br>Xanthophylls | ss196486297  | 55K        | 8   | 121,437,794              | 1.78E-05 | 9.94E-02                    | 0.33                                  | 196            | 0.00                                    | 0.36                                      | 0.11                                     | 0.20                                  | -0.07          | -0.40                                   | 0.19                                        |
|                                              |                   |                                                                                                    | $\beta$ -Xanthophylls/ $\alpha$ -<br>Xanthophylls | ss196516738  | 55K        | 8   | 124,488,144              | 5.06E-06 | 6.35E-02                    | 0.20                                  | 196            | 0.00                                    | 0.24                                      | 0.11                                     | 0.21                                  | -0.09          | -0.40                                   | 0.27                                        |
|                                              |                   |                                                                                                    | $\beta$ -Xanthophylls/ $\alpha$ -                 | S8_128602581 | GBS        | 8   | 128,602,581              | 1.57E-05 | 9.94E-02                    | 0.36                                  | 196            | 0.18                                    | 0.47                                      | 0.11                                     | 0.20                                  | -0.07          | -0.40                                   | 0.19                                        |

|                                      |               |      |                                               |              |                    |   |             |          |          |      |     |      |      |      |      |       |       |       |
|--------------------------------------|---------------|------|-----------------------------------------------|--------------|--------------------|---|-------------|----------|----------|------|-----|------|------|------|------|-------|-------|-------|
|                                      |               |      | Xanthophylls                                  |              |                    |   |             |          |          |      |     |      |      |      |      |       |       |       |
|                                      |               |      | $\beta$ -Xanthophylls/ $\alpha$ -Xanthophylls | S8_128947357 | GBS                | 8 | 128,947,357 | 1.60E-05 | 9.94E-02 | 0.31 | 196 | 0.37 | 0.36 | 0.11 | 0.20 | 0.07  | -0.40 | -0.16 |
|                                      |               |      | $\beta$ -Xanthophylls/ $\alpha$ -Xanthophylls | S8_129072699 | GBS                | 8 | 129,072,699 | 1.41E-06 | 2.55E-02 | 0.36 | 196 | 0.50 | 0.35 | 0.11 | 0.23 | 0.07  | -0.40 | -0.16 |
|                                      |               |      | $\beta$ -Xanthophylls/ $\alpha$ -Xanthophylls | S8_129075429 | GBS                | 8 | 129,075,429 | 7.91E-06 | 7.92E-02 | 0.42 | 196 | 0.50 | 0.44 | 0.11 | 0.21 | 0.07  | -0.40 | -0.15 |
|                                      |               |      | $\beta$ -Xanthophylls/ $\alpha$ -Xanthophylls | S8_129080393 | GBS                | 8 | 129,080,393 | 6.40E-06 | 7.43E-02 | 0.47 | 196 | 0.21 | 0.38 | 0.11 | 0.21 | -0.07 | -0.40 | 0.18  |
|                                      |               |      | $\beta$ -Xanthophylls/ $\alpha$ -Xanthophylls | S8_129122614 | GBS                | 8 | 129,122,614 | 8.84E-06 | 7.92E-02 | 0.47 | 196 | 0.20 | 0.39 | 0.11 | 0.21 | -0.06 | -0.40 | 0.18  |
|                                      |               |      | $\beta$ -Xanthophylls/ $\alpha$ -Xanthophylls | S8_129122646 | GBS                | 8 | 129,122,646 | 8.84E-06 | 7.92E-02 | 0.47 | 196 | 0.20 | 0.39 | 0.11 | 0.21 | -0.06 | -0.40 | 0.18  |
|                                      |               |      | $\beta$ -Xanthophylls/ $\alpha$ -Xanthophylls | S8_129124046 | GBS                | 8 | 129,124,046 | 3.27E-06 | 4.75E-02 | 0.34 | 196 | 0.50 | 0.35 | 0.11 | 0.22 | 0.07  | -0.40 | -0.16 |
|                                      |               |      | $\beta$ -Xanthophylls/ $\alpha$ -Xanthophylls | S8_129124626 | GBS                | 8 | 129,124,626 | 1.85E-06 | 2.83E-02 | 0.29 | 196 | 0.27 | 0.31 | 0.11 | 0.22 | -0.08 | -0.40 | 0.22  |
|                                      |               |      | $\beta$ -Xanthophylls/ $\alpha$ -Xanthophylls | S8_129137347 | GBS                | 8 | 129,137,347 | 4.09E-06 | 5.39E-02 | 0.41 | 196 | 0.15 | 0.48 | 0.11 | 0.22 | 0.07  | -0.40 | -0.15 |
|                                      |               |      | $\beta$ -Xanthophylls/ $\alpha$ -Xanthophylls | ss196512938  | 55K                | 8 | 129,291,444 | 9.28E-06 | 7.92E-02 | 0.34 | 196 | 0.14 | 0.36 | 0.11 | 0.21 | -0.07 | -0.40 | 0.20  |
|                                      |               |      | $\beta$ -Xanthophylls/ $\alpha$ -Xanthophylls | S8_129313857 | GBS                | 8 | 129,313,857 | 1.49E-05 | 9.94E-02 | 0.29 | 196 | 0.05 | 0.34 | 0.11 | 0.20 | -0.07 | -0.40 | 0.20  |
|                                      |               |      | $\beta$ -Xanthophylls/ $\alpha$ -Xanthophylls | ss196486728  | 55K                | 8 | 130,510,859 | 8.61E-06 | 7.92E-02 | 0.17 | 196 | 0.33 | 0.16 | 0.11 | 0.21 | 0.08  | -0.40 | -0.18 |
|                                      |               |      | $\beta$ -Xanthophylls/ $\alpha$ -Xanthophylls | S8_130513659 | GBS                | 8 | 130,513,659 | 7.07E-06 | 7.88E-02 | 0.14 | 196 | 0.33 | 0.14 | 0.11 | 0.21 | -0.09 | -0.40 | 0.27  |
|                                      |               |      | $\beta$ -Xanthophylls/ $\alpha$ -Xanthophylls | S8_130930928 | GBS                | 8 | 130,930,928 | 1.69E-06 | 2.73E-02 | 0.09 | 196 | 0.42 | 0.05 | 0.11 | 0.22 | 0.13  | -0.40 | -0.26 |
|                                      |               |      | $\beta$ -Xanthophylls/ $\alpha$ -Xanthophylls | ss196486759  | 55K                | 8 | 131,124,166 | 1.12E-05 | 8.55E-02 | 0.34 | 196 | 0.19 | 0.36 | 0.11 | 0.21 | -0.07 | -0.40 | 0.19  |
|                                      |               |      | $\beta$ -Xanthophylls/ $\alpha$ -Xanthophylls | S8_131533827 | GBS                | 8 | 131,533,827 | 1.02E-05 | 8.47E-02 | 0.29 | 196 | 0.13 | 0.37 | 0.11 | 0.21 | 0.07  | -0.40 | -0.16 |
| Carotenoid Synthesis and Degradation | GRMZM2G012966 | IcyE | Total $\alpha$ -Xanthophylls                  | IcyE 5'TE    | Additional Markers | 8 | 138,882,481 | 4.97E-09 | 7.26E-04 | NA   | 200 | NA   | NA   | .09  | .43  | NA    | 0.70  | NA    |
| Carotenoid Synthesis and Degradation | GRMZM2G012966 | IcyE | Lutein                                        | IcyE 5'TE    | Additional Markers | 8 | 138,882,481 | 2.24E-08 | 3.27E-03 | NA   | 200 | NA   | NA   | .12  | .49  | NA    | 0.80  | NA    |
| Carotenoid Synthesis and Degradation | GRMZM2G012966 | IcyE | $\beta$ -Xanthophylls/ $\alpha$ -Xanthophylls | ss196504160  | 55K                | 8 | 138,882,711 | 4.03E-10 | 5.84E-05 | 0.35 | 196 | 0.48 | 0.34 | 0.11 | 0.31 | 0.11  | -0.40 | -0.23 |
| Carotenoid Synthesis and Degradation | GRMZM2G012966 | IcyE | $\beta$ -Carotenoids/ $\alpha$ -Carotenoids   | ss196504160  | 55K                | 8 | 138,882,711 | 2.75E-09 | 7.92E-04 | 0.37 | 189 | 0.48 | 0.34 | 0.20 | 0.36 | 0.12  | -0.85 | -0.12 |
| Carotenoid Synthesis and Degradation | GRMZM2G012966 | IcyE | $\beta$ -Xanthophylls/ $\alpha$ -Xanthophylls | S8_138882711 | GBS                | 8 | 138,882,711 | 3.23E-07 | 1.04E-02 | 0.28 | 196 | 0.41 | 0.30 | 0.11 | 0.24 | -0.09 | -0.40 | 0.26  |
| Carotenoid Synthesis and Degradation | GRMZM2G012966 | IcyE | $\beta$ -Carotenoids/ $\alpha$ -Carotenoids   | S8_138882711 | GBS                | 8 | 138,882,711 | 1.71E-06 | 5.46E-02 | 0.29 | 189 | 0.41 | 0.30 | 0.20 | 0.30 | -0.09 | -0.85 | 0.12  |
| Carotenoid Synthesis and Degradation | GRMZM2G012966 | IcyE | Total $\beta$ -Xanthophylls                   | ss196504160  | 55K                | 8 | 138,882,711 | 1.77E-06 | 6.40E-02 | 0.35 | 195 | 0.48 | 0.34 | 0.05 | 0.17 | -0.26 | 0.40  | -0.53 |
| Carotenoid Synthesis and Degradation | GRMZM2G012966 | IcyE | Zeaxanthin                                    | ss196504160  | 55K                | 8 | 138,882,711 | 2.80E-06 | 7.37E-02 | 0.35 | 196 | 0.48 | 0.34 | 0.04 | 0.16 | -0.19 | 0.35  | -0.44 |
| Carotenoid Synthesis and Degradation | GRMZM2G012966 | IcyE | $\beta$ -Xanthophylls/ $\alpha$ -Xanthophylls | S8_138882747 | GBS                | 8 | 138,882,747 | 3.23E-07 | 1.04E-02 | 0.28 | 196 | 0.41 | 0.30 | 0.11 | 0.24 | -0.09 | -0.40 | 0.26  |
| Carotenoid Synthesis and Degradation | GRMZM2G012966 | IcyE | $\beta$ -Carotenoids/ $\alpha$ -Carotenoids   | S8_138882747 | GBS                | 8 | 138,882,747 | 1.71E-06 | 5.46E-02 | 0.29 | 189 | 0.41 | 0.30 | 0.20 | 0.30 | -0.09 | -0.85 | 0.12  |
| Carotenoid Synthesis and Degradation | GRMZM2G012966 | IcyE | $\beta$ -Xanthophylls/ $\alpha$ -Xanthophylls | S8_138882751 | GBS                | 8 | 138,882,751 | 3.23E-07 | 1.04E-02 | 0.28 | 196 | 0.41 | 0.30 | 0.11 | 0.24 | -0.09 | -0.40 | 0.26  |
| Carotenoid Synthesis and Degradation | GRMZM2G012966 | IcyE | $\beta$ -Carotenoids/ $\alpha$ -Carotenoids   | S8_138882751 | GBS                | 8 | 138,882,751 | 1.71E-06 | 5.46E-02 | 0.29 | 189 | 0.41 | 0.30 | 0.20 | 0.30 | -0.09 | -0.85 | 0.12  |
| Carotenoid Synthesis and Degradation | GRMZM2G012966 | IcyE | $\beta$ -Xanthophylls/ $\alpha$ -Xanthophylls | S8_138882798 | GBS                | 8 | 138,882,798 | 2.65E-07 | 1.04E-02 | 0.31 | 196 | 0.21 | 0.36 | 0.11 | 0.24 | -0.09 | -0.40 | 0.26  |
| Carotenoid Synthesis and Degradation | GRMZM2G012966 | IcyE | $\beta$ -Carotenoids/ $\alpha$ -Carotenoids   | S8_138882798 | GBS                | 8 | 138,882,798 | 2.59E-06 | 6.88E-02 | 0.31 | 189 | 0.21 | 0.36 | 0.20 | 0.30 | -0.09 | -0.85 | 0.12  |
| Carotenoid Synthesis and Degradation | GRMZM2G012966 | IcyE | $\beta$ -Xanthophylls/ $\alpha$ -Xanthophylls | S8_138882897 | GBS                | 8 | 138,882,897 | 1.55E-08 | 1.12E-03 | 0.43 | 196 | 0.12 | 0.44 | 0.11 | 0.27 | -0.09 | -0.40 | 0.26  |



|                                      |               |        |                                                        |                      |                    |    |             |          |          |      |     |      |      |      |      |       |       |       |
|--------------------------------------|---------------|--------|--------------------------------------------------------|----------------------|--------------------|----|-------------|----------|----------|------|-----|------|------|------|------|-------|-------|-------|
| Carotenoid Synthesis and Degradation | GRMZM2G012966 | lcyE   | $\beta$ -Carotenoids/ $\alpha$ -Carotenoids            | S8_138882897         | GBS                | 8  | 138,882,897 | 6.73E-08 | 9.69E-03 | 0.43 | 189 | 0.12 | 0.44 | 0.20 | 0.33 | -0.10 | -0.85 | 0.13  |
| Carotenoid Synthesis and Degradation | GRMZM2G012966 | lcyE   | $\beta$ -Xanthophylls/ $\alpha$ -Xanthophylls          | S8_138883026         | GBS                | 8  | 138,883,026 | 1.04E-06 | 2.02E-02 | 0.40 | 196 | 0.18 | 0.48 | 0.11 | 0.23 | 0.08  | -0.40 | -0.17 |
| Carotenoid Synthesis and Degradation | GRMZM2G012966 | lcyE   | $\beta$ -Xanthophylls/ $\alpha$ -Xanthophylls          | S8_138883056         | GBS                | 8  | 138,883,056 | 1.04E-06 | 2.02E-02 | 0.40 | 196 | 0.18 | 0.48 | 0.11 | 0.23 | -0.08 | -0.40 | 0.22  |
| Carotenoid Synthesis and Degradation | GRMZM2G012966 | lcyE   | $\beta$ -Xanthophylls/ $\alpha$ -Xanthophylls          | <i>lcyE</i> SNP216   | Additional Markers | 8  | 138,883,206 | 7.15E-16 | 2.07E-10 | NA   | 196 | NA   | NA   | .08  | .22  | NA    | -0.40 | NA    |
| Carotenoid Synthesis and Degradation | GRMZM2G012966 | lcyE   | Total $\alpha$ -Xanthophylls                           | <i>lcyE</i> SNP216   | Additional Markers | 8  | 138,883,206 | 5.37E-10 | 1.57E-04 | NA   | 200 | NA   | NA   | .09  | .40  | NA    | 0.70  | NA    |
| Carotenoid Synthesis and Degradation | GRMZM2G012966 | lcyE   | Lutein                                                 | <i>lcyE</i> SNP216   | Additional Markers | 8  | 138,883,206 | 6.44E-09 | 1.88E-03 | NA   | 200 | NA   | NA   | .12  | .45  | NA    | 0.80  | NA    |
| Carotenoid Synthesis and Degradation | GRMZM2G012966 | lcyE   | Total $\beta$ -Xanthophylls                            | <i>lcyE</i> SNP216   | Additional Markers | 8  | 138,883,206 | 1.64E-07 | 1.19E-02 | NA   | 195 | NA   | NA   | .05  | .29  | NA    | 0.40  | NA    |
| Carotenoid Synthesis and Degradation | GRMZM2G012966 | lcyE   | $\beta$ -Xanthophylls/ $\alpha$ -Xanthophylls          | PZB00665.1           | 4K                 | 8  | 138,886,137 | 5.28E-07 | 1.28E-02 | 0.35 | 196 | 0.05 | 0.38 | 0.11 | 0.24 | 0.08  | -0.40 | -0.18 |
| Carotenoid Synthesis and Degradation | GRMZM2G012966 | lcyE   | $\beta$ -Xanthophylls/ $\alpha$ -Xanthophylls          | S8_138888278         | GBS                | 8  | 138,888,278 | 2.98E-09 | 2.88E-04 | 0.47 | 196 | 0.19 | 0.42 | 0.11 | 0.29 | -0.10 | -0.40 | 0.30  |
| Carotenoid Synthesis and Degradation | GRMZM2G012966 | lcyE   | $\beta$ -Carotenoids/ $\alpha$ -Carotenoids            | S8_138888278         | GBS                | 8  | 138,888,278 | 1.80E-07 | 1.73E-02 | 0.47 | 189 | 0.19 | 0.42 | 0.20 | 0.32 | -0.10 | -0.85 | 0.13  |
|                                      |               |        | $\beta$ -Xanthophylls/ $\alpha$ -Xanthophylls          | ss196508843          | 55K                | 8  | 139,143,878 | 1.33E-07 | 7.74E-03 | 0.29 | 196 | 0.38 | 0.26 | 0.11 | 0.25 | 0.09  | -0.40 | -0.19 |
|                                      |               |        | $\beta$ -Carotenoids/ $\alpha$ -Carotenoids            | ss196508843          | 55K                | 8  | 139,143,878 | 1.02E-06 | 4.88E-02 | 0.31 | 189 | 0.38 | 0.26 | 0.20 | 0.31 | 0.09  | -0.85 | -0.10 |
|                                      |               |        | $\beta$ -Xanthophylls/ $\alpha$ -Xanthophylls          | ss196507132          | 55K                | 8  | 139,300,073 | 3.68E-06 | 5.09E-02 | 0.39 | 196 | 0.18 | 0.49 | 0.11 | 0.22 | -0.07 | -0.40 | 0.22  |
|                                      |               |        | $\beta$ -Xanthophylls/ $\alpha$ -Xanthophylls          | S8_140192724         | GBS                | 8  | 140,192,724 | 6.19E-07 | 1.38E-02 | 0.33 | 196 | 0.19 | 0.28 | 0.11 | 0.23 | -0.08 | -0.40 | 0.24  |
|                                      |               |        | $\beta$ -Carotenoids/ $\alpha$ -Carotenoids            | S8_140192724         | GBS                | 8  | 140,192,724 | 2.63E-06 | 6.88E-02 | 0.34 | 189 | 0.19 | 0.28 | 0.20 | 0.30 | -0.09 | -0.85 | 0.11  |
|                                      |               |        | Total $\beta$ -Xanthophylls                            | S8_171705545         | GBS                | 8  | 171,705,545 | 3.98E-07 | 2.30E-02 | 0.10 | 195 | 0.14 | 0.14 | 0.05 | 0.18 | -0.40 | 0.40  | -0.72 |
|                                      |               |        | Zeaxanthin                                             | S8_171705545         | GBS                | 8  | 171,705,545 | 6.85E-07 | 3.82E-02 | 0.11 | 196 | 0.14 | 0.14 | 0.04 | 0.17 | -0.28 | 0.35  | -0.61 |
|                                      |               |        | Total $\beta$ -Xanthophylls                            | S8_171705574         | GBS                | 8  | 171,705,574 | 1.27E-07 | 1.19E-02 | 0.10 | 195 | 0.25 | 0.13 | 0.05 | 0.20 | -0.42 | 0.40  | -0.74 |
|                                      |               |        | Zeaxanthin                                             | S8_171705574         | GBS                | 8  | 171,705,574 | 1.98E-07 | 1.91E-02 | 0.11 | 196 | 0.25 | 0.13 | 0.04 | 0.19 | -0.30 | 0.35  | -0.63 |
|                                      |               |        | $\beta$ -Xanthophylls/ $\alpha$ -Xanthophylls          | ss196493105          | 55K                | 9  | 118,437,281 | 1.54E-06 | 2.63E-02 | 0.29 | 196 | 0.19 | 0.42 | 0.11 | 0.22 | -0.09 | -0.40 | 0.28  |
| Carotenoid Synthesis and Degradation | GRMZM2G152135 | crtRB1 | $\beta$ -Carotene/( $\beta$ -Cryptoxanthin+Zeaxanthin) | <i>crtRB1</i> InDel4 | Additional Markers | 10 | 136,059,748 | 1.72E-07 | 5.00E-02 | NA   | 196 | NA   | NA   | .03  | .08  | NA    | -0.25 | NA    |
| Carotenoid Synthesis and Degradation | GRMZM2G152135 | crtRB1 | $\beta$ -Carotene/( $\beta$ -Cryptoxanthin+Zeaxanthin) | ss196501627          | 55K                | 10 | 136,060,033 | 3.67E-07 | 5.33E-02 | 0.19 | 196 | 0.00 | 0.22 | 0.04 | 0.18 | 0.12  | -0.25 | -0.36 |
| Carotenoid Synthesis and Degradation | GRMZM2G152135 | crtRB1 | Total Carotenes/Total Xanthophylls                     | <i>crtRB1</i> 3'TE   | Additional Markers | 10 | 136,061,719 | 1.33E-07 | 3.82E-02 | NA   | 188 | NA   | NA   | .02  | .14  | NA    | -0.55 | NA    |
| Carotenoid Synthesis and Degradation | GRMZM2G152135 | crtRB1 | Zeaxanthin                                             | <i>crtRB1</i> 3'TE   | Additional Markers | 10 | 136,061,719 | 1.12E-06 | 3.82E-02 | NA   | 196 | NA   | NA   | .04  | .15  | NA    | 0.35  | NA    |
| Carotenoid Synthesis and Degradation | GRMZM2G152135 | crtRB1 | Total $\beta$ -Xanthophylls                            | <i>crtRB1</i> 3'TE   | Additional Markers | 10 | 136,061,719 | 1.77E-06 | 6.40E-02 | NA   | 195 | NA   | NA   | .05  | .17  | NA    | 0.40  | NA    |

Statistically significant results from genome-wide association studies on 24 grain carotenoid traits with the peak SNP tagging the GWAS signal from *lut1* included as a covariate. Markers (Column E) that were significantly associated with the indicated trait (Column D) at 5% false discovery rate (FDR) are demarcated with boldface font and those significant only at 10% FDR without boldface font.

Table S8 Genome-wide Association Study Results with Covariates for *lcyE* (D)

| <i>a priori</i> candidate gene pathway | RefGen_v2 Gene ID | Annotated gene containing associated SNP or gene within 3kb of associated SNP | Trait                                                  | SNP ID        | SNP Source         | Chr | Position in RefGen_v2 | P-value  | FDR-Adjusted P-value | Minor Allele Frequency (MAF) | Sample Size | MAF Tropical (8% of 201 Lines) | MAF Temperate (92% of 201 Lines) | R-square_LR from Model without SNP | R-square_LR from Model with SNP | Effect Size | Lambda from Box-Cox Procedure | Back-Transformed Effect Estimates |
|----------------------------------------|-------------------|-------------------------------------------------------------------------------|--------------------------------------------------------|---------------|--------------------|-----|-----------------------|----------|----------------------|------------------------------|-------------|--------------------------------|----------------------------------|------------------------------------|---------------------------------|-------------|-------------------------------|-----------------------------------|
|                                        |                   |                                                                               | Zeaxanthin                                             | S1_2940079    | GBS                | 1   | 2,940,079             | 3.37E-06 | 9.80E-02             | 0.05                         | 176         | 0.50                           | 0.03                             | 0.18                               | 0.29                            | -0.37       | 0.35                          | -0.74                             |
| Carotenoid Synthesis and Degradation   | GRMZM2G143202     | lut1                                                                          | $\alpha$ -Carotene/Zeaxanthin                          | ss196425306   | 55K                | 1   | 86,844,203            | 7.23E-10 | 7.03E-05             | 0.33                         | 178         | 0.40                           | 0.28                             | 0.16                               | 0.37                            | 0.07        | -0.25                         | -0.22                             |
| Carotenoid Synthesis and Degradation   | GRMZM2G143202     | lut1                                                                          | Zeaxanthin                                             | ss196425306   | 55K                | 1   | 86,844,203            | 4.28E-08 | 4.15E-03             | 0.32                         | 178         | 0.40                           | 0.28                             | 0.10                               | 0.27                            | -0.12       | -0.25                         | 0.67                              |
| Carotenoid Synthesis and Degradation   | GRMZM2G143202     | lut1                                                                          | Zeaxanthin/Lutein                                      | ss196425306   | 55K                | 1   | 86,844,203            | 4.98E-08 | 4.80E-03             | 0.31                         | 175         | 0.40                           | 0.28                             | 0.08                               | 0.25                            | -0.21       | -0.35                         | 0.93                              |
|                                        |                   |                                                                               | $\alpha$ -Carotene/Zeaxanthin                          | ss196425308   | 55K                | 1   | 86,945,134            | 7.23E-10 | 7.03E-05             | 0.33                         | 178         | 0.40                           | 0.27                             | 0.16                               | 0.37                            | 0.07        | -0.25                         | -0.22                             |
|                                        |                   |                                                                               | Zeaxanthin                                             | ss196425308   | 55K                | 1   | 86,945,134            | 4.28E-08 | 4.15E-03             | 0.32                         | 178         | 0.40                           | 0.27                             | 0.10                               | 0.27                            | -0.12       | -0.25                         | 0.67                              |
|                                        |                   |                                                                               | Zeaxanthin/Lutein                                      | ss196425308   | 55K                | 1   | 86,945,134            | 4.98E-08 | 4.80E-03             | 0.31                         | 175         | 0.40                           | 0.27                             | 0.08                               | 0.25                            | -0.21       | -0.35                         | 0.93                              |
| Carotenoid Synthesis and Degradation   | GRMZM2G127139     | zep1                                                                          | Zeaxanthin                                             | S2_44448432   | GBS                | 2   | 44,448,432            | 7.43E-09 | 1.08E-03             | 0.11                         | 176         | 0.29                           | 0.09                             | 0.18                               | 0.36                            | -0.32       | 0.35                          | -0.67                             |
| Carotenoid Synthesis and Degradation   | GRMZM2G127139     | zep1                                                                          | Total $\beta$ -Xanthophylls                            | S2_44448432   | GBS                | 2   | 44,448,432            | 8.43E-08 | 1.22E-02             | 0.11                         | 175         | 0.29                           | 0.09                             | 0.20                               | 0.34                            | -0.40       | 0.40                          | -0.73                             |
| Carotenoid Synthesis and Degradation   | GRMZM2G127139     | zep1                                                                          | $\beta$ -Xanthophylls/ $\alpha$ -Xanthophylls          | S2_44448432   | GBS                | 2   | 44,448,432            | 5.10E-07 | 7.40E-02             | 0.11                         | 176         | 0.29                           | 0.09                             | 0.45                               | 0.54                            | 0.10        | -0.40                         | -0.22                             |
| Carotenoid Synthesis and Degradation   | GRMZM2G127139     | zep1                                                                          | Zeaxanthin                                             | S2_44448438   | GBS                | 2   | 44,448,438            | 7.43E-09 | 1.08E-03             | 0.11                         | 176         | 0.29                           | 0.09                             | 0.18                               | 0.36                            | 0.32        | 0.35                          | 1.22                              |
| Carotenoid Synthesis and Degradation   | GRMZM2G127139     | zep1                                                                          | Total $\beta$ -Xanthophylls                            | S2_44448438   | GBS                | 2   | 44,448,438            | 8.43E-08 | 1.22E-02             | 0.11                         | 175         | 0.29                           | 0.09                             | 0.20                               | 0.34                            | 0.40        | 0.40                          | 1.34                              |
| Carotenoid Synthesis and Degradation   | GRMZM2G127139     | zep1                                                                          | $\beta$ -Xanthophylls/ $\alpha$ -Xanthophylls          | S2_44448438   | GBS                | 2   | 44,448,438            | 5.10E-07 | 7.40E-02             | 0.11                         | 176         | 0.29                           | 0.09                             | 0.45                               | 0.54                            | -0.10       | -0.40                         | 0.32                              |
|                                        |                   |                                                                               | Zeaxanthin                                             | S5_216074707  | GBS                | 5   | 216,074,707           | 2.89E-06 | 9.80E-02             | 0.14                         | 176         | 0.17                           | 0.17                             | 0.18                               | 0.29                            | -0.23       | 0.35                          | -0.52                             |
|                                        |                   |                                                                               | $\beta$ -Cryptoxanthin                                 | S7_13843351   | GBS                | 7   | 13,843,351            | 1.40E-07 | 4.09E-02             | 0.16                         | 179         | 0.10                           | 0.16                             | 0.19                               | 0.33                            | -0.04       | 0.10                          | -0.33                             |
|                                        |                   |                                                                               | Zeaxanthin                                             | S7_15282645   | GBS                | 7   | 15,282,645            | 9.69E-07 | 7.05E-02             | 0.18                         | 178         | 0.42                           | 0.20                             | 0.10                               | 0.23                            | -0.12       | -0.25                         | 0.65                              |
|                                        |                   |                                                                               | Total $\beta$ -Xanthophylls                            | ss196478758   | 55K                | 7   | 103,626,333           | 6.37E-07 | 4.60E-02             | 0.41                         | 175         | 0.19                           | 0.44                             | 0.20                               | 0.32                            | -0.24       | 0.40                          | -0.50                             |
|                                        |                   |                                                                               | Zeaxanthin                                             | ss196478758   | 55K                | 7   | 103,626,333           | 7.39E-07 | 5.35E-02             | 0.41                         | 176         | 0.19                           | 0.44                             | 0.18                               | 0.31                            | -0.18       | 0.35                          | -0.42                             |
|                                        |                   |                                                                               | Zeaxanthin                                             | S7_107111687  | GBS                | 7   | 107,111,687           | 1.48E-06 | 7.19E-02             | 0.16                         | 178         | 0.23                           | 0.25                             | 0.10                               | 0.23                            | 0.12        | -0.25                         | -0.36                             |
|                                        |                   |                                                                               | Zeaxanthin                                             | S7_107111713  | GBS                | 7   | 107,111,713           | 1.48E-06 | 7.19E-02             | 0.16                         | 178         | 0.23                           | 0.25                             | 0.10                               | 0.23                            | 0.12        | -0.25                         | -0.36                             |
|                                        |                   |                                                                               | Total $\beta$ -Xanthophylls                            | S7_108788777  | GBS                | 7   | 108,788,777           | 1.08E-06 | 6.23E-02             | 0.49                         | 175         | 0.29                           | 0.43                             | 0.20                               | 0.32                            | -0.23       | 0.40                          | -0.47                             |
|                                        |                   |                                                                               | Zeaxanthin                                             | S7_108788777  | GBS                | 7   | 108,788,777           | 3.13E-06 | 9.80E-02             | 0.49                         | 176         | 0.29                           | 0.43                             | 0.18                               | 0.29                            | -0.16       | 0.35                          | -0.39                             |
|                                        |                   |                                                                               | Total Carotenoids                                      | S7_121184182  | GBS                | 7   | 121,184,182           | 9.65E-07 | 9.10E-02             | 0.08                         | 181         | 0.14                           | 0.08                             | 0.06                               | 0.19                            | -1.41       | 0.65                          | -1.26                             |
|                                        |                   |                                                                               | Total Carotenoids                                      | S7_121184311  | GBS                | 7   | 121,184,311           | 8.11E-07 | 9.10E-02             | 0.08                         | 181         | 0.13                           | 0.09                             | 0.06                               | 0.19                            | -1.42       | 0.65                          | -1.27                             |
|                                        |                   |                                                                               | Total Carotenoids                                      | S7_121185458  | GBS                | 7   | 121,185,458           | 1.37E-06 | 9.66E-02             | 0.06                         | 181         | 0.13                           | 0.07                             | 0.06                               | 0.19                            | -1.55       | 0.65                          | -1.40                             |
|                                        |                   |                                                                               | Total $\beta$ -Xanthophylls                            | S7_121185500  | GBS                | 7   | 121,185,500           | 1.99E-07 | 1.91E-02             | 0.09                         | 175         | 0.19                           | 0.09                             | 0.20                               | 0.33                            | 0.40        | 0.40                          | 1.33                              |
|                                        |                   |                                                                               | Zeaxanthin                                             | S7_121185500  | GBS                | 7   | 121,185,500           | 4.13E-07 | 3.99E-02             | 0.09                         | 176         | 0.19                           | 0.09                             | 0.18                               | 0.31                            | 0.29        | 0.35                          | 1.08                              |
|                                        |                   |                                                                               | Total Carotenoids                                      | S7_121185500  | GBS                | 7   | 121,185,500           | 3.67E-07 | 9.10E-02             | 0.08                         | 181         | 0.19                           | 0.09                             | 0.06                               | 0.20                            | 1.42        | 0.65                          | 2.88                              |
|                                        |                   |                                                                               | Total $\beta$ -Xanthophylls                            | S8_171705574  | GBS                | 8   | 171,705,574           | 1.57E-06 | 7.28E-02             | 0.11                         | 175         | 0.25                           | 0.13                             | 0.20                               | 0.31                            | -0.36       | 0.40                          | -0.68                             |
|                                        |                   |                                                                               | Zeaxanthin                                             | S8_171705574  | GBS                | 8   | 171,705,574           | 1.50E-06 | 7.77E-02             | 0.11                         | 176         | 0.25                           | 0.13                             | 0.18                               | 0.30                            | -0.26       | 0.35                          | -0.58                             |
|                                        |                   |                                                                               | $\alpha$ -Carotene/Zeaxanthin                          | ss196491114   | 55K                | 9   | 69,215,031            | 7.23E-10 | 7.03E-05             | 0.33                         | 178         | 0.37                           | 0.29                             | 0.16                               | 0.37                            | -0.07       | -0.25                         | 0.31                              |
|                                        |                   |                                                                               | Zeaxanthin                                             | ss196491114   | 55K                | 9   | 69,215,031            | 4.28E-08 | 4.15E-03             | 0.32                         | 178         | 0.37                           | 0.29                             | 0.10                               | 0.27                            | 0.12        | -0.25                         | -0.37                             |
|                                        |                   |                                                                               | Zeaxanthin/Lutein                                      | ss196491114   | 55K                | 9   | 69,215,031            | 4.98E-08 | 4.80E-03             | 0.31                         | 175         | 0.37                           | 0.29                             | 0.08                               | 0.25                            | 0.21        | -0.35                         | -0.41                             |
| Carotenoid Synthesis and Degradation   | GRMZM2G152135     | crtRB1                                                                        | Total Carotenoids/Total Xanthophylls                   | crtRB1 InDel4 | Additional Markers | 10  | 136,059,748           | 3.98E-08 | 5.72E-03             | NA                           | 188         | NA                             | NA                               | .06                                | .19                             | NA          | -0.55                         | NA                                |
| Carotenoid Synthesis and Degradation   | GRMZM2G152135     | crtRB1                                                                        | Zeaxanthin                                             | crtRB1 InDel4 | Additional Markers | 10  | 136,059,748           | 3.38E-06 | 9.80E-02             | NA                           | 196         | NA                             | NA                               | .24                                | .32                             | NA          | 0.35                          | NA                                |
| Carotenoid Synthesis and Degradation   | GRMZM2G152135     | crtRB1                                                                        | $\beta$ -Carotene/( $\beta$ -Cryptoxanthin+Zeaxanthin) | crtRB1 3'TE   | Additional Markers | 10  | 136,061,719           | 2.13E-10 | 6.21E-05             | NA                           | 196         | NA                             | NA                               | .04                                | .10                             | NA          | -0.25                         | NA                                |
| Carotenoid Synthesis and Degradation   | GRMZM2G152135     | crtRB1                                                                        | Total Carotenoids/Total Xanthophylls                   | crtRB1 3'TE   | Additional Markers | 10  | 136,061,719           | 3.30E-09 | 9.49E-04             | NA                           | 188         | NA                             | NA                               | .06                                | .22                             | NA          | -0.55                         | NA                                |
| Carotenoid Synthesis and Degradation   | GRMZM2G152135     | crtRB1                                                                        | Total $\beta$ -Xanthophylls                            | crtRB1 3'TE   | Additional Markers | 10  | 136,061,719           | 1.76E-06 | 7.28E-02             | NA                           | 195         | NA                             | NA                               | .29                                | .38                             | NA          | 0.40                          | NA                                |
| Carotenoid Synthesis and Degradation   | GRMZM2G152135     | crtRB1                                                                        | Zeaxanthin                                             | crtRB1 3'TE   | Additional Markers | 10  | 136,061,719           | 1.61E-06 | 7.77E-02             | NA                           | 196         | NA                             | NA                               | .24                                | .33                             | NA          | 0.35                          | NA                                |

Statistically significant results from genome-wide association studies on 24 grain carotenoid traits with the markers tagging *lcyE* identified in the multi-locus mixed model included as covariates. Markers (Column E) that were significantly associated with the indicated trait (Column D) at 5% false discovery rate (FDR) are

Table S8 Genome-wide Association Study Results with S8\_171705574 Covariate (E)

| <i>a priori</i><br>candidate<br>gene pathway | RefGen_v2 Gene ID | Annotated<br>gene<br>containing<br>associated<br>SNP or gene<br>within 3kb of<br>associated<br>SNP | Trait                                             | SNP ID           | SNP Source            | Chr | Position in<br>RefGen_v2 | P-value  | FDR-<br>Adjusted<br>P-value | Minor<br>Allele<br>Frequency<br>(MAF) | Sample<br>Size | MAF<br>Tropical<br>(8% of<br>201 Lines) | MAF<br>Temperate<br>(92% of 201<br>Lines) | R-square_LR<br>from Model<br>without SNP | R-square_LR<br>from Model<br>with SNP | Effect<br>Size | Lambda<br>from Box-<br>Cox<br>Procedure | Back-<br>Transformed<br>Effect<br>Estimates |
|----------------------------------------------|-------------------|----------------------------------------------------------------------------------------------------|---------------------------------------------------|------------------|-----------------------|-----|--------------------------|----------|-----------------------------|---------------------------------------|----------------|-----------------------------------------|-------------------------------------------|------------------------------------------|---------------------------------------|----------------|-----------------------------------------|---------------------------------------------|
| Carotenoid<br>Synthesis and<br>Degradation   | GRMZM2G143202     | lut1                                                                                               | $\alpha$ -Carotene/Zeinoxanthin                   | ss196425306      | 55K                   | 1   | 86,844,203               | 5.23E-10 | 5.06E-05                    | 0.31                                  | 196            | 0.40                                    | 0.28                                      | 0.17                                     | 0.35                                  | 0.06           | -0.25                                   | -0.22                                       |
| Carotenoid<br>Synthesis and<br>Degradation   | GRMZM2G143202     | lut1                                                                                               | Zeinoxanthin/Lutein                               | ss196425306      | 55K                   | 1   | 86,844,203               | 4.34E-08 | 6.28E-03                    | 0.29                                  | 195            | 0.40                                    | 0.28                                      | 0.09                                     | 0.24                                  | -0.19          | -0.35                                   | 0.84                                        |
| Carotenoid<br>Synthesis and<br>Degradation   | GRMZM2G143202     | lut1                                                                                               | Zeinoxanthin                                      | ss196425306      | 55K                   | 1   | 86,844,203               | 7.31E-08 | 1.06E-02                    | 0.30                                  | 198            | 0.40                                    | 0.28                                      | 0.10                                     | 0.25                                  | -0.11          | -0.25                                   | 0.62                                        |
|                                              |                   |                                                                                                    | $\alpha$ -Carotene/Zeinoxanthin                   | ss196425308      | 55K                   | 1   | 86,945,134               | 5.23E-10 | 5.06E-05                    | 0.31                                  | 196            | 0.40                                    | 0.27                                      | 0.17                                     | 0.35                                  | 0.06           | -0.25                                   | -0.22                                       |
|                                              |                   |                                                                                                    | Zeinoxanthin/Lutein                               | ss196425308      | 55K                   | 1   | 86,945,134               | 4.34E-08 | 6.28E-03                    | 0.29                                  | 195            | 0.40                                    | 0.27                                      | 0.09                                     | 0.24                                  | -0.19          | -0.35                                   | 0.84                                        |
|                                              |                   |                                                                                                    | Zeinoxanthin                                      | ss196425308      | 55K                   | 1   | 86,945,134               | 7.31E-08 | 1.06E-02                    | 0.30                                  | 198            | 0.40                                    | 0.27                                      | 0.10                                     | 0.25                                  | -0.11          | -0.25                                   | 0.62                                        |
|                                              |                   |                                                                                                    | Lutein                                            | S1_96310268      | GBS                   | 1   | 96,310,268               | 5.53E-07 | 5.39E-02                    | 0.17                                  | 200            | 0.06                                    | 0.21                                      | 0.13                                     | 0.25                                  | 1.21           | 0.80                                    | 1.70                                        |
| Carotenoid<br>Synthesis and<br>Degradation   | GRMZM2G127139     | zep1                                                                                               | Zeaxanthin                                        | S2_44448432      | GBS                   | 2   | 44,448,432               | 2.15E-09 | 3.11E-04                    | 0.11                                  | 196            | 0.29                                    | 0.09                                      | 0.19                                     | 0.35                                  | -0.32          | 0.35                                    | -0.66                                       |
| Carotenoid<br>Synthesis and<br>Degradation   | GRMZM2G127139     | zep1                                                                                               | Total $\beta$ -Xanthophylls                       | S2_44448432      | GBS                   | 2   | 44,448,432               | 1.75E-08 | 2.54E-03                    | 0.11                                  | 195            | 0.29                                    | 0.09                                      | 0.20                                     | 0.34                                  | -0.40          | 0.40                                    | -0.72                                       |
| Carotenoid<br>Synthesis and<br>Degradation   | GRMZM2G127139     | zep1                                                                                               | $\beta$ -Xanthophylls/ $\alpha$ -<br>Xanthophylls | S2_44448432      | GBS                   | 2   | 44,448,432               | 1.31E-07 | 7.61E-03                    | 0.11                                  | 196            | 0.29                                    | 0.09                                      | 0.19                                     | 0.31                                  | 0.12           | -0.40                                   | -0.25                                       |
| Carotenoid<br>Synthesis and<br>Degradation   | GRMZM2G127139     | zep1                                                                                               | Zeaxanthin                                        | S2_44448438      | GBS                   | 2   | 44,448,438               | 2.15E-09 | 3.11E-04                    | 0.11                                  | 196            | 0.29                                    | 0.09                                      | 0.19                                     | 0.35                                  | 0.32           | 0.35                                    | 1.19                                        |
| Carotenoid<br>Synthesis and<br>Degradation   | GRMZM2G127139     | zep1                                                                                               | Total $\beta$ -Xanthophylls                       | S2_44448438      | GBS                   | 2   | 44,448,438               | 1.75E-08 | 2.54E-03                    | 0.11                                  | 195            | 0.29                                    | 0.09                                      | 0.20                                     | 0.34                                  | 0.40           | 0.40                                    | 1.32                                        |
| Carotenoid<br>Synthesis and<br>Degradation   | GRMZM2G127139     | zep1                                                                                               | $\beta$ -Xanthophylls/ $\alpha$ -<br>Xanthophylls | S2_44448438      | GBS                   | 2   | 44,448,438               | 1.31E-07 | 7.61E-03                    | 0.11                                  | 196            | 0.29                                    | 0.09                                      | 0.19                                     | 0.31                                  | -0.12          | -0.40                                   | 0.39                                        |
|                                              |                   |                                                                                                    | Zeaxanthin                                        | S2_44473748      | GBS                   | 2   | 44,473,748               | 1.72E-07 | 9.98E-03                    | 0.14                                  | 196            | 0.25                                    | 0.12                                      | 0.19                                     | 0.31                                  | 0.24           | 0.35                                    | 0.87                                        |
|                                              |                   |                                                                                                    | Total $\beta$ -Xanthophylls                       | S2_44473748      | GBS                   | 2   | 44,473,748               | 5.64E-07 | 3.26E-02                    | 0.14                                  | 195            | 0.25                                    | 0.12                                      | 0.20                                     | 0.31                                  | 0.32           | 0.40                                    | 0.99                                        |
|                                              |                   |                                                                                                    | $\beta$ -Xanthophylls/ $\alpha$ -Xanthophylls     | S2_44473748      | GBS                   | 2   | 44,473,748               | 2.75E-06 | 5.71E-02                    | 0.14                                  | 196            | 0.25                                    | 0.12                                      | 0.19                                     | 0.28                                  | -0.10          | -0.40                                   | 0.28                                        |
|                                              |                   |                                                                                                    | Zeaxanthin                                        | S2_44473758      | GBS                   | 2   | 44,473,758               | 1.72E-07 | 9.98E-03                    | 0.14                                  | 196            | 0.24                                    | 0.12                                      | 0.19                                     | 0.31                                  | -0.24          | 0.35                                    | -0.55                                       |
|                                              |                   |                                                                                                    | Total $\beta$ -Xanthophylls                       | S2_44473758      | GBS                   | 2   | 44,473,758               | 5.64E-07 | 3.26E-02                    | 0.14                                  | 195            | 0.24                                    | 0.12                                      | 0.20                                     | 0.31                                  | -0.32          | 0.40                                    | -0.61                                       |
|                                              |                   |                                                                                                    | $\beta$ -Xanthophylls/ $\alpha$ -Xanthophylls     | S2_44473758      | GBS                   | 2   | 44,473,758               | 2.75E-06 | 5.71E-02                    | 0.14                                  | 196            | 0.24                                    | 0.12                                      | 0.19                                     | 0.28                                  | 0.10           | -0.40                                   | -0.20                                       |
|                                              |                   |                                                                                                    | Zeaxanthin                                        | S2_44473801      | GBS                   | 2   | 44,473,801               | 1.72E-07 | 9.98E-03                    | 0.14                                  | 196            | 0.24                                    | 0.12                                      | 0.19                                     | 0.31                                  | 0.24           | 0.35                                    | 0.87                                        |
|                                              |                   |                                                                                                    | Total $\beta$ -Xanthophylls                       | S2_44473801      | GBS                   | 2   | 44,473,801               | 5.64E-07 | 3.26E-02                    | 0.14                                  | 195            | 0.24                                    | 0.12                                      | 0.20                                     | 0.31                                  | 0.32           | 0.40                                    | 0.99                                        |
|                                              |                   |                                                                                                    | $\beta$ -Xanthophylls/ $\alpha$ -Xanthophylls     | S2_44473801      | GBS                   | 2   | 44,473,801               | 2.75E-06 | 5.71E-02                    | 0.14                                  | 196            | 0.24                                    | 0.12                                      | 0.19                                     | 0.28                                  | -0.10          | -0.40                                   | 0.28                                        |
|                                              |                   |                                                                                                    | Zeaxanthin                                        | S2_44474139      | GBS                   | 2   | 44,474,139               | 9.65E-07 | 4.36E-02                    | 0.14                                  | 196            | 0.29                                    | 0.13                                      | 0.19                                     | 0.29                                  | -0.23          | 0.35                                    | -0.52                                       |
|                                              |                   |                                                                                                    | $\beta$ -Xanthophylls/ $\alpha$ -Xanthophylls     | S2_44474139      | GBS                   | 2   | 44,474,139               | 4.99E-06 | 8.52E-02                    | 0.14                                  | 196            | 0.29                                    | 0.13                                      | 0.19                                     | 0.28                                  | 0.09           | -0.40                                   | -0.20                                       |
|                                              |                   |                                                                                                    | Zeaxanthin                                        | S2_44474308      | GBS                   | 2   | 44,474,308               | 1.09E-06 | 4.36E-02                    | 0.21                                  | 196            | 0.38                                    | 0.28                                      | 0.19                                     | 0.29                                  | 0.20           | 0.35                                    | 0.67                                        |
|                                              |                   |                                                                                                    | Total $\alpha$ -Xanthophylls                      | ss196456701      | 55K                   | 4   | 146,977,283              | 7.48E-07 | 7.29E-02                    | 0.12                                  | 200            | 0.38                                    | 0.08                                      | 0.11                                     | 0.23                                  | -0.89          | 0.70                                    | -0.95                                       |
|                                              |                   |                                                                                                    | $\beta$ -Cryptoxanthin                            | S7_13843351      | GBS                   | 7   | 13,843,351               | 2.78E-07 | 8.12E-02                    | 0.15                                  | 199            | 0.10                                    | 0.16                                      | 0.17                                     | 0.29                                  | -0.04          | 0.10                                    | -0.32                                       |
|                                              |                   |                                                                                                    | Zeinoxanthin                                      | S7_15282645      | GBS                   | 7   | 15,282,645               | 1.18E-07 | 1.14E-02                    | 0.17                                  | 198            | 0.42                                    | 0.20                                      | 0.10                                     | 0.24                                  | -0.12          | -0.25                                   | 0.69                                        |
| Carotenoid<br>Synthesis and<br>Degradation   | GRMZM2G012966     | lycE                                                                                               | Total $\alpha$ -Xanthophylls                      | <i>lycE</i> 5'TE | Additional<br>Markers | 8   | 138,882,481              | 3.99E-09 | 5.83E-04                    | NA                                    | 200            | NA                                      | NA                                        | .10                                      | .43                                   | NA             | 0.70                                    | NA                                          |
| Carotenoid<br>Synthesis and<br>Degradation   | GRMZM2G012966     | lycE                                                                                               | Lutein                                            | <i>lycE</i> 5'TE | Additional<br>Markers | 8   | 138,882,481              | 1.52E-08 | 2.22E-03                    | NA                                    | 200            | NA                                      | NA                                        | .11                                      | .49                                   | NA             | 0.80                                    | NA                                          |
| Carotenoid<br>Synthesis and<br>Degradation   | GRMZM2G012966     | lycE                                                                                               | $\beta$ -Xanthophylls/ $\alpha$ -<br>Xanthophylls | ss196504160      | 55K                   | 8   | 138,882,711              | 3.69E-09 | 5.35E-04                    | 0.35                                  | 196            | 0.48                                    | 0.34                                      | 0.19                                     | 0.35                                  | 0.10           | -0.40                                   | -0.21                                       |
| Carotenoid<br>Synthesis and<br>Degradation   | GRMZM2G012966     | lycE                                                                                               | $\beta$ -Carotenoids/ $\alpha$ -Carotenoids       | ss196504160      | 55K                   | 8   | 138,882,711              | 4.67E-09 | 1.34E-03                    | 0.37                                  | 189            | 0.48                                    | 0.34                                      | 0.22                                     | 0.38                                  | 0.11           | -0.85                                   | -0.12                                       |
| Carotenoid<br>Synthesis and<br>Degradation   | GRMZM2G012966     | lycE                                                                                               | $\beta$ -Xanthophylls/ $\alpha$ -<br>Xanthophylls | S8_138882711     | GBS                   | 8   | 138,882,711              | 1.58E-06 | 4.57E-02                    | 0.28                                  | 196            | 0.41                                    | 0.30                                      | 0.19                                     | 0.29                                  | -0.08          | -0.40                                   | 0.24                                        |
| Carotenoid<br>Synthesis and<br>Degradation   | GRMZM2G012966     | lycE                                                                                               | $\beta$ -Xanthophylls/ $\alpha$ -<br>Xanthophylls | S8_138882747     | GBS                   | 8   | 138,882,747              | 1.58E-06 | 4.57E-02                    | 0.28                                  | 196            | 0.41                                    | 0.30                                      | 0.19                                     | 0.29                                  | -0.08          | -0.40                                   | 0.24                                        |
| Carotenoid<br>Synthesis and<br>Degradation   | GRMZM2G012966     | lycE                                                                                               | $\beta$ -Xanthophylls/ $\alpha$ -<br>Xanthophylls | S8_138882751     | GBS                   | 8   | 138,882,751              | 1.58E-06 | 4.57E-02                    | 0.28                                  | 196            | 0.41                                    | 0.30                                      | 0.19                                     | 0.29                                  | -0.08          | -0.40                                   | 0.24                                        |
| Carotenoid<br>Synthesis and                  | GRMZM2G012966     | lycE                                                                                               | $\beta$ -Xanthophylls/ $\alpha$ -Xanthophylls     | S8_138882798     | GBS                   | 8   | 138,882,798              | 2.66E-06 | 5.71E-02                    | 0.31                                  | 196            | 0.21                                    | 0.36                                      | 0.19                                     | 0.28                                  | -0.08          | -0.40                                   | 0.23                                        |

|                                      |               |        |                                                        |                      |                    |    |             |          |          |      |     |      |      |      |      |       |       |       |
|--------------------------------------|---------------|--------|--------------------------------------------------------|----------------------|--------------------|----|-------------|----------|----------|------|-----|------|------|------|------|-------|-------|-------|
| Degradation                          |               |        |                                                        |                      |                    |    |             |          |          |      |     |      |      |      |      |       |       |       |
| Carotenoid Synthesis and Degradation | GRMZM2G012966 | lycE   | $\beta$ -Xanthophylls/ $\alpha$ -Xanthophylls          | S8_138882897         | GBS                | 8  | 138,882,897 | 2.15E-07 | 1.04E-02 | 0.43 | 196 | 0.12 | 0.44 | 0.19 | 0.31 | -0.08 | -0.40 | 0.23  |
| Carotenoid Synthesis and Degradation | GRMZM2G012966 | lycE   | $\beta$ -Carotenoids/ $\alpha$ -Carotenoids            | S8_138882897         | GBS                | 8  | 138,882,897 | 1.14E-07 | 1.64E-02 | 0.43 | 189 | 0.12 | 0.44 | 0.22 | 0.35 | -0.09 | -0.85 | 0.12  |
| Carotenoid Synthesis and Degradation | GRMZM2G012966 | lycE   | $\beta$ -Xanthophylls/ $\alpha$ -Xanthophylls          | <i>lycE</i> SNP216   | Additional Markers | 8  | 138,883,206 | 2.78E-15 | 8.06E-10 | NA   | 196 | NA   | NA   | .13  | .26  | NA    | -0.40 | NA    |
| Carotenoid Synthesis and Degradation | GRMZM2G012966 | lycE   | Total $\alpha$ -Xanthophylls                           | <i>lycE</i> SNP216   | Additional Markers | 8  | 138,883,206 | 3.24E-10 | 9.48E-05 | NA   | 200 | NA   | NA   | .10  | .40  | NA    | 0.70  | NA    |
| Carotenoid Synthesis and Degradation | GRMZM2G012966 | lycE   | Lutein                                                 | <i>lycE</i> SNP216   | Additional Markers | 8  | 138,883,206 | 4.75E-09 | 1.39E-03 | NA   | 200 | NA   | NA   | .11  | .45  | NA    | 0.80  | NA    |
| Carotenoid Synthesis and Degradation | GRMZM2G012966 | lycE   | $\beta$ -Xanthophylls/ $\alpha$ -Xanthophylls          | PZB00665.1           | 4K                 | 8  | 138,886,137 | 1.47E-06 | 4.57E-02 | 0.35 | 196 | 0.05 | 0.38 | 0.19 | 0.29 | 0.08  | -0.40 | -0.18 |
| Carotenoid Synthesis and Degradation | GRMZM2G012966 | lycE   | $\beta$ -Xanthophylls/ $\alpha$ -Xanthophylls          | S8_138888278         | GBS                | 8  | 138,888,278 | 1.58E-08 | 1.53E-03 | 0.47 | 196 | 0.19 | 0.42 | 0.19 | 0.33 | -0.09 | -0.40 | 0.28  |
| Carotenoid Synthesis and Degradation | GRMZM2G012966 | lycE   | $\beta$ -Carotenoids/ $\alpha$ -Carotenoids            | S8_138888278         | GBS                | 8  | 138,888,278 | 2.43E-07 | 2.33E-02 | 0.47 | 189 | 0.19 | 0.42 | 0.22 | 0.34 | -0.10 | -0.85 | 0.13  |
|                                      |               |        | $\beta$ -Xanthophylls/ $\alpha$ -Xanthophylls          | ss196508843          | 55K                | 8  | 139,143,878 | 3.32E-06 | 6.02E-02 | 0.29 | 196 | 0.38 | 0.26 | 0.19 | 0.28 | 0.08  | -0.40 | -0.17 |
|                                      |               |        | $\beta$ -Xanthophylls/ $\alpha$ -Xanthophylls          | S8_140192724         | GBS                | 8  | 140,192,724 | 2.98E-06 | 5.77E-02 | 0.33 | 196 | 0.19 | 0.28 | 0.19 | 0.28 | -0.08 | -0.40 | 0.22  |
|                                      |               |        | $\beta$ -Carotenoids/ $\alpha$ -Carotenoids            | S8_140192724         | GBS                | 8  | 140,192,724 | 1.29E-06 | 9.31E-02 | 0.34 | 189 | 0.19 | 0.28 | 0.22 | 0.32 | -0.09 | -0.85 | 0.11  |
|                                      |               |        | $\alpha$ -Carotene/Zeaxanthin                          | ss196491114          | 55K                | 9  | 69,215,031  | 5.01E-10 | 5.06E-05 | 0.31 | 196 | 0.37 | 0.29 | 0.17 | 0.35 | -0.06 | -0.25 | 0.30  |
|                                      |               |        | Zeaxanthin/Lutein                                      | ss196491114          | 55K                | 9  | 69,215,031  | 8.52E-08 | 8.23E-03 | 0.28 | 195 | 0.37 | 0.29 | 0.09 | 0.24 | 0.19  | -0.35 | -0.39 |
|                                      |               |        | Zeaxanthin                                             | ss196491114          | 55K                | 9  | 69,215,031  | 3.07E-07 | 2.23E-02 | 0.30 | 198 | 0.37 | 0.29 | 0.10 | 0.23 | 0.11  | -0.25 | -0.34 |
| Carotenoid Synthesis and Degradation | GRMZM2G152135 | crtRB1 | $\beta$ -Carotene/( $\beta$ -Cryptoxanthin+Zeaxanthin) | <i>crtRB1</i> InDel4 | Additional Markers | 10 | 136,059,748 | 2.87E-07 | 5.79E-02 | NA   | 196 | NA   | NA   | .04  | .08  | NA    | -0.25 | NA    |
| Carotenoid Synthesis and Degradation | GRMZM2G152135 | crtRB1 | $\beta$ -Carotene/( $\beta$ -Cryptoxanthin+Zeaxanthin) | ss196501627          | 55K                | 10 | 136,060,033 | 3.99E-07 | 5.79E-02 | 0.19 | 196 | 0.00 | 0.22 | 0.04 | 0.18 | 0.12  | -0.25 | -0.36 |
| Carotenoid Synthesis and Degradation | GRMZM2G152135 | crtRB1 | Zeaxanthin                                             | <i>crtRB1</i> 3'TE   | Additional Markers | 10 | 136,061,719 | 1.20E-06 | 4.36E-02 | NA   | 196 | NA   | NA   | .17  | .27  | NA    | 0.35  | NA    |

Statistically significant results from genome-wide association studies on 24 grain carotenoid traits with SNP S8\_171705574 included as a covariate. Markers (Column E) that were significantly associated with the indicated trait (Column D) at 5% false discovery rate (FDR) are demarcated with boldface font and those significant only at 10% FDR without boldface font.

Table S8 Genome-wide Association Study Results with Covariate for *crTRB1* (F)

| <i>a priori</i><br>candidate<br>gene pathway | RefGen_v2 Gene ID | Annotated<br>gene<br>containing<br>associated<br>SNP or gene<br>within 3kb of<br>associated<br>SNP | Trait                                             | SNP ID             | SNP Source            | Chr | Position in<br>RefGen_v2 | P-value  | FDR-<br>Adjusted P-<br>value | Minor Allele<br>Frequency<br>(MAF) | Sample<br>Size | MAF<br>Tropical<br>(8% of<br>201<br>Lines) | MAF<br>Temperate<br>(92% of 201<br>Lines) | R-square_LR<br>from Model<br>without SNP | R-<br>square_LR<br>from<br>Model<br>with SNP | Effect<br>Size | Lambda from<br>Box-Cox<br>Procedure | Back-<br>Transformed<br>Effect<br>Estimates |
|----------------------------------------------|-------------------|----------------------------------------------------------------------------------------------------|---------------------------------------------------|--------------------|-----------------------|-----|--------------------------|----------|------------------------------|------------------------------------|----------------|--------------------------------------------|-------------------------------------------|------------------------------------------|----------------------------------------------|----------------|-------------------------------------|---------------------------------------------|
| Carotenoid<br>Synthesis and<br>Degradation   | GRMZM2G143202     | lut1                                                                                               | $\alpha$ -Carotene/Zeinoxanthin                   | ss196425306        | 55K                   | 1   | 86,844,203               | 8.94E-10 | 8.59E-05                     | 0.32                               | 190            | 0.40                                       | 0.28                                      | 0.17                                     | 0.36                                         | 0.06           | -0.25                               | -0.21                                       |
| Carotenoid<br>Synthesis and<br>Degradation   | GRMZM2G143202     | lut1                                                                                               | Zeinoxanthin/Lutein                               | ss196425306        | 55K                   | 1   | 86,844,203               | 5.87E-08 | 8.43E-03                     | 0.30                               | 189            | 0.40                                       | 0.28                                      | 0.09                                     | 0.25                                         | -0.19          | -0.35                               | 0.85                                        |
| Carotenoid<br>Synthesis and<br>Degradation   | GRMZM2G143202     | lut1                                                                                               | Zeinoxanthin                                      | ss196425306        | 55K                   | 1   | 86,844,203               | 1.21E-07 | 1.74E-02                     | 0.31                               | 192            | 0.40                                       | 0.28                                      | 0.10                                     | 0.24                                         | -0.11          | -0.25                               | 0.62                                        |
|                                              |                   |                                                                                                    | $\alpha$ -Carotene/Zeinoxanthin                   | ss196425308        | 55K                   | 1   | 86,945,134               | 8.94E-10 | 8.59E-05                     | 0.32                               | 190            | 0.40                                       | 0.27                                      | 0.17                                     | 0.36                                         | 0.06           | -0.25                               | -0.21                                       |
|                                              |                   |                                                                                                    | Zeinoxanthin/Lutein                               | ss196425308        | 55K                   | 1   | 86,945,134               | 5.87E-08 | 8.43E-03                     | 0.30                               | 189            | 0.40                                       | 0.27                                      | 0.09                                     | 0.25                                         | -0.19          | -0.35                               | 0.85                                        |
|                                              |                   |                                                                                                    | Zeinoxanthin                                      | ss196425308        | 55K                   | 1   | 86,945,134               | 1.21E-07 | 1.74E-02                     | 0.31                               | 192            | 0.40                                       | 0.27                                      | 0.10                                     | 0.24                                         | -0.11          | -0.25                               | 0.62                                        |
|                                              |                   |                                                                                                    | Lutein                                            | S1_96310268        | GBS                   | 1   | 96,310,268               | 2.24E-07 | 3.24E-02                     | 0.17                               | 194            | 0.06                                       | 0.21                                      | 0.12                                     | 0.26                                         | 1.28           | 0.80                                | 1.81                                        |
| Carotenoid<br>Synthesis and<br>Degradation   | GRMZM2G127139     | zep1                                                                                               | Zeaxanthin                                        | S2_44448432        | GBS                   | 2   | 44,448,432               | 2.71E-09 | 3.89E-04                     | 0.11                               | 190            | 0.29                                       | 0.09                                      | 0.12                                     | 0.30                                         | -0.32          | 0.35                                | -0.67                                       |
| Carotenoid<br>Synthesis and<br>Degradation   | GRMZM2G127139     | zep1                                                                                               | Total $\beta$ -Xanthophylls                       | S2_44448432        | GBS                   | 2   | 44,448,432               | 2.34E-08 | 3.35E-03                     | 0.11                               | 189            | 0.29                                       | 0.09                                      | 0.12                                     | 0.28                                         | -0.41          | 0.40                                | -0.74                                       |
| Carotenoid<br>Synthesis and<br>Degradation   | GRMZM2G127139     | zep1                                                                                               | $\beta$ -Xanthophylls/ $\alpha$ -<br>Xanthophylls | S2_44448432        | GBS                   | 2   | 44,448,432               | 8.21E-08 | 7.61E-03                     | 0.11                               | 190            | 0.29                                       | 0.09                                      | 0.18                                     | 0.31                                         | 0.13           | -0.40                               | -0.26                                       |
| Carotenoid<br>Synthesis and<br>Degradation   | GRMZM2G127139     | zep1                                                                                               | Zeaxanthin                                        | S2_44448438        | GBS                   | 2   | 44,448,438               | 2.71E-09 | 3.89E-04                     | 0.11                               | 190            | 0.29                                       | 0.09                                      | 0.12                                     | 0.30                                         | 0.32           | 0.35                                | 1.22                                        |
| Carotenoid<br>Synthesis and<br>Degradation   | GRMZM2G127139     | zep1                                                                                               | Total $\beta$ -Xanthophylls                       | S2_44448438        | GBS                   | 2   | 44,448,438               | 2.34E-08 | 3.35E-03                     | 0.11                               | 189            | 0.29                                       | 0.09                                      | 0.12                                     | 0.28                                         | 0.41           | 0.40                                | 1.37                                        |
| Carotenoid<br>Synthesis and<br>Degradation   | GRMZM2G127139     | zep1                                                                                               | $\beta$ -Xanthophylls/ $\alpha$ -<br>Xanthophylls | S2_44448438        | GBS                   | 2   | 44,448,438               | 8.21E-08 | 7.61E-03                     | 0.11                               | 190            | 0.29                                       | 0.09                                      | 0.18                                     | 0.31                                         | -0.13          | -0.40                               | 0.41                                        |
|                                              |                   |                                                                                                    | Zeaxanthin                                        | S2_44473748        | GBS                   | 2   | 44,473,748               | 3.89E-07 | 1.60E-02                     | 0.13                               | 190            | 0.25                                       | 0.12                                      | 0.12                                     | 0.25                                         | 0.25           | 0.35                                | 0.89                                        |
|                                              |                   |                                                                                                    | Total $\beta$ -Xanthophylls                       | S2_44473748        | GBS                   | 2   | 44,473,748               | 1.41E-06 | 4.49E-02                     | 0.13                               | 189            | 0.25                                       | 0.12                                      | 0.12                                     | 0.24                                         | 0.32           | 0.40                                | 1.01                                        |
|                                              |                   |                                                                                                    | $\beta$ -Xanthophylls/ $\alpha$ -Xanthophylls     | S2_44473748        | GBS                   | 2   | 44,473,748               | 1.76E-06 | 6.32E-02                     | 0.13                               | 190            | 0.25                                       | 0.12                                      | 0.18                                     | 0.28                                         | -0.10          | -0.40                               | 0.31                                        |
|                                              |                   |                                                                                                    | Zeaxanthin                                        | S2_44473758        | GBS                   | 2   | 44,473,758               | 3.89E-07 | 1.60E-02                     | 0.13                               | 190            | 0.24                                       | 0.12                                      | 0.12                                     | 0.25                                         | -0.25          | 0.35                                | -0.56                                       |
|                                              |                   |                                                                                                    | Total $\beta$ -Xanthophylls                       | S2_44473758        | GBS                   | 2   | 44,473,758               | 1.41E-06 | 4.49E-02                     | 0.13                               | 189            | 0.24                                       | 0.12                                      | 0.12                                     | 0.24                                         | -0.32          | 0.40                                | -0.62                                       |
|                                              |                   |                                                                                                    | $\beta$ -Xanthophylls/ $\alpha$ -Xanthophylls     | S2_44473758        | GBS                   | 2   | 44,473,758               | 1.76E-06 | 5.05E-02                     | 0.13                               | 190            | 0.24                                       | 0.12                                      | 0.18                                     | 0.28                                         | 0.10           | -0.40                               | -0.21                                       |
|                                              |                   |                                                                                                    | Zeaxanthin                                        | S2_44473801        | GBS                   | 2   | 44,473,801               | 3.89E-07 | 1.60E-02                     | 0.13                               | 190            | 0.24                                       | 0.12                                      | 0.12                                     | 0.25                                         | 0.25           | 0.35                                | 0.89                                        |
|                                              |                   |                                                                                                    | Total $\beta$ -Xanthophylls                       | S2_44473801        | GBS                   | 2   | 44,473,801               | 1.41E-06 | 4.49E-02                     | 0.13                               | 189            | 0.24                                       | 0.12                                      | 0.12                                     | 0.24                                         | 0.32           | 0.40                                | 1.01                                        |
|                                              |                   |                                                                                                    | $\beta$ -Xanthophylls/ $\alpha$ -Xanthophylls     | S2_44473801        | GBS                   | 2   | 44,473,801               | 1.76E-06 | 5.05E-02                     | 0.13                               | 190            | 0.24                                       | 0.12                                      | 0.18                                     | 0.28                                         | -0.10          | -0.40                               | 0.31                                        |
|                                              |                   |                                                                                                    | Zeaxanthin                                        | S2_44474139        | GBS                   | 2   | 44,474,139               | 1.48E-06 | 4.26E-02                     | 0.14                               | 190            | 0.29                                       | 0.13                                      | 0.12                                     | 0.24                                         | -0.23          | 0.35                                | -0.53                                       |
|                                              |                   |                                                                                                    | $\beta$ -Xanthophylls/ $\alpha$ -Xanthophylls     | S2_44474139        | GBS                   | 2   | 44,474,139               | 2.48E-06 | 6.49E-02                     | 0.14                               | 190            | 0.29                                       | 0.13                                      | 0.18                                     | 0.28                                         | 0.10           | -0.40                               | -0.21                                       |
|                                              |                   |                                                                                                    | Zeaxanthin                                        | S2_44474308        | GBS                   | 2   | 44,474,308               | 1.63E-06 | 4.26E-02                     | 0.21                               | 190            | 0.38                                       | 0.28                                      | 0.12                                     | 0.24                                         | 0.20           | 0.35                                | 0.68                                        |
|                                              |                   |                                                                                                    | Zeaxanthin                                        | S3_169734997       | GBS                   | 3   | 169,734,997              | 1.04E-06 | 3.33E-02                     | 0.06                               | 190            | 0.25                                       | 0.07                                      | 0.12                                     | 0.24                                         | -0.39          | 0.35                                | -0.75                                       |
|                                              |                   |                                                                                                    | Total $\beta$ -Xanthophylls                       | S3_169734997       | GBS                   | 3   | 169,734,997              | 8.48E-07 | 4.06E-02                     | 0.06                               | 189            | 0.25                                       | 0.07                                      | 0.12                                     | 0.24                                         | -0.54          | 0.40                                | -0.86                                       |
|                                              |                   |                                                                                                    | Zeaxanthin                                        | S3_172380629       | GBS                   | 3   | 172,380,629              | 3.87E-06 | 9.20E-02                     | 0.05                               | 190            | 0.15                                       | 0.05                                      | 0.12                                     | 0.23                                         | -0.38          | 0.35                                | -0.75                                       |
|                                              |                   |                                                                                                    | $\beta$ -Cryptoxanthin                            | S7_13843351        | GBS                   | 7   | 13,843,351               | 1.77E-07 | 5.11E-02                     | 0.16                               | 193            | 0.10                                       | 0.16                                      | 0.13                                     | 0.27                                         | -0.04          | 0.10                                | -0.33                                       |
|                                              |                   |                                                                                                    | Zeinoxanthin                                      | S7_15282645        | GBS                   | 7   | 15,282,645               | 2.70E-07 | 2.59E-02                     | 0.18                               | 192            | 0.42                                       | 0.20                                      | 0.10                                     | 0.23                                         | -0.12          | -0.25                               | 0.66                                        |
|                                              |                   |                                                                                                    | Zeaxanthin                                        | S8_2511818         | GBS                   | 8   | 2,511,818                | 4.16E-06 | 9.20E-02                     | 0.05                               | 190            | 0.45                                       | 0.11                                      | 0.12                                     | 0.23                                         | -0.33          | 0.35                                | -0.69                                       |
|                                              |                   |                                                                                                    | $\beta$ -Xanthophylls/ $\alpha$ -Xanthophylls     | PZD00025.1         | 4K                    | 8   | 22,245,644               | 2.97E-06 | 7.12E-02                     | 0.14                               | 190            | 0.24                                       | 0.14                                      | 0.18                                     | 0.28                                         | 0.10           | -0.40                               | -0.21                                       |
| Carotenoid<br>Synthesis and<br>Degradation   | GRMZM2G012966     | lycE                                                                                               | $\beta$ -Xanthophylls/ $\alpha$ -<br>Xanthophylls | <i>lycE</i> 5'TE   | Additional<br>Markers | 8   | 138,882,481              | 2.43E-13 | 3.49E-08                     | NA                                 | 196            | NA                                         | NA                                        | .04                                      | .24                                          | NA             | NA                                  | NA                                          |
| Carotenoid<br>Synthesis and<br>Degradation   | GRMZM2G012966     | lycE                                                                                               | $\beta$ -Carotenoids/ $\alpha$ -Carotenoids       | <i>lycE</i> 5'TE   | Additional<br>Markers | 8   | 138,882,481              | 1.35E-13 | 3.86E-08                     | NA                                 | 189            | NA                                         | NA                                        | .01                                      | .28                                          | NA             | NA                                  | NA                                          |
| Carotenoid<br>Synthesis and<br>Degradation   | GRMZM2G012966     | lycE                                                                                               | $\beta$ -Xanthophylls/ $\alpha$ -<br>Xanthophylls | ss196504160        | 55K                   | 8   | 138,882,711              | 6.86E-09 | 6.58E-04                     | 0.35                               | 190            | 0.48                                       | 0.34                                      | 0.18                                     | 0.34                                         | 0.10           | -0.40                               | -0.21                                       |
| Carotenoid<br>Synthesis and<br>Degradation   | GRMZM2G012966     | lycE                                                                                               | $\beta$ -Carotenoids/ $\alpha$ -Carotenoids       | ss196504160        | 55K                   | 8   | 138,882,711              | 7.10E-09 | 1.01E-03                     | 0.36                               | 184            | 0.48                                       | 0.34                                      | 0.20                                     | 0.37                                         | 0.11           | -0.85                               | -0.12                                       |
| Carotenoid<br>Synthesis and<br>Degradation   | GRMZM2G012966     | lycE                                                                                               | $\beta$ -Carotenoids/ $\alpha$ -Carotenoids       | S8_138882897       | GBS                   | 8   | 138,882,897              | 1.28E-07 | 1.22E-02                     | 0.43                               | 184            | 0.12                                       | 0.44                                      | 0.20                                     | 0.34                                         | -0.10          | -0.85                               | 0.13                                        |
| Carotenoid<br>Synthesis and<br>Degradation   | GRMZM2G012966     | lycE                                                                                               | $\beta$ -Xanthophylls/ $\alpha$ -<br>Xanthophylls | S8_138882897       | GBS                   | 8   | 138,882,897              | 4.03E-07 | 1.66E-02                     | 0.43                               | 190            | 0.12                                       | 0.44                                      | 0.18                                     | 0.30                                         | -0.08          | -0.40                               | 0.24                                        |
| Carotenoid<br>Synthesis and<br>Degradation   | GRMZM2G012966     | lycE                                                                                               | Lutein                                            | <i>lycE</i> SNP216 | Additional<br>Markers | 8   | 138,883,206              | 1.08E-09 | 3.12E-04                     | NA                                 | 200            | NA                                         | NA                                        | .12                                      | .49                                          | NA             | NA                                  | NA                                          |

|                                      |               |      |                               |                     |                    |          |                    |                 |                 |             |            |             |             |             |             |              |              |              |
|--------------------------------------|---------------|------|-------------------------------|---------------------|--------------------|----------|--------------------|-----------------|-----------------|-------------|------------|-------------|-------------|-------------|-------------|--------------|--------------|--------------|
| Carotenoid Synthesis and Degradation | GRMZM2G012966 | lycE | Zeaxanthin                    | lycE SNP216         | Additional Markers | 8        | 138,883,206        | 1.02E-06        | 3.33E-02        | NA          | 196        | NA          | NA          | .17         | .34         | NA           | NA           | NA           |
| Carotenoid Synthesis and Degradation | GRMZM2G012966 | lycE | Total β-Xanthophylls          | lycE SNP216         | Additional Markers | 8        | 138,883,206        | 8.01E-07        | 4.06E-02        | NA          | 195        | NA          | NA          | .18         | .39         | NA           | NA           | NA           |
| Carotenoid Synthesis and Degradation | GRMZM2G012966 | lycE | Total α-Xanthophylls          | lycE SNP216         | Additional Markers | 8        | 138,883,206        | 1.39E-10        | 4.03E-05        | NA          | 200        | NA          | NA          | .09         | .42         | NA           | NA           | NA           |
| Carotenoid Synthesis and Degradation | GRMZM2G012966 | lycE | β-Xanthophylls/α-Xanthophylls | lycE SNP216         | Additional Markers | 8        | 138,883,206        | 1.86E-14        | 5.35E-09        | NA          | 196        | NA          | NA          | .04         | .25         | NA           | NA           | NA           |
| Carotenoid Synthesis and Degradation | GRMZM2G012966 | lycE | β-Xanthophylls/α-Xanthophylls | S8_138888278        | GBS                | 8        | 138,888,278        | 1.06E-07        | 5.07E-03        | 0.47        | 190        | 0.19        | 0.42        | 0.18        | 0.31        | -0.09        | -0.40        | 0.27         |
| Carotenoid Synthesis and Degradation | GRMZM2G012966 | lycE | β-Carotenoids/α-Carotenoids   | S8_138888278        | GBS                | 8        | 138,888,278        | 3.97E-07        | 2.83E-02        | 0.47        | 184        | 0.19        | 0.42        | 0.20        | 0.32        | -0.10        | -0.85        | 0.13         |
|                                      |               |      | β-Xanthophylls/α-Xanthophylls | S8_140192724        | GBS                | 8        | 140,192,724        | 3.36E-06        | 7.44E-02        | 0.34        | 190        | 0.19        | 0.28        | 0.18        | 0.28        | -0.08        | -0.40        | 0.22         |
|                                      |               |      | β-Carotenoids/α-Carotenoids   | S8_140192724        | GBS                | 8        | 140,192,724        | 1.27E-06        | 7.22E-02        | 0.35        | 184        | 0.19        | 0.28        | 0.20        | 0.31        | -0.09        | -0.85        | 0.12         |
|                                      |               |      | <b>Zeaxanthin</b>             | <b>S8_171705545</b> | <b>GBS</b>         | <b>8</b> | <b>171,705,545</b> | <b>2.95E-07</b> | <b>1.60E-02</b> | <b>0.11</b> | <b>190</b> | <b>0.14</b> | <b>0.14</b> | <b>0.12</b> | <b>0.25</b> | <b>-0.28</b> | <b>0.35</b>  | <b>-0.61</b> |
|                                      |               |      | <b>Total β-Xanthophylls</b>   | <b>S8_171705545</b> | <b>GBS</b>         | <b>8</b> | <b>171,705,545</b> | <b>2.80E-07</b> | <b>2.01E-02</b> | <b>0.10</b> | <b>189</b> | <b>0.14</b> | <b>0.14</b> | <b>0.12</b> | <b>0.26</b> | <b>-0.40</b> | <b>0.40</b>  | <b>-0.72</b> |
|                                      |               |      | <b>Zeaxanthin</b>             | <b>S8_171705574</b> | <b>GBS</b>         | <b>8</b> | <b>171,705,574</b> | <b>9.09E-08</b> | <b>8.71E-03</b> | <b>0.11</b> | <b>190</b> | <b>0.25</b> | <b>0.13</b> | <b>0.12</b> | <b>0.27</b> | <b>-0.29</b> | <b>0.35</b>  | <b>-0.63</b> |
|                                      |               |      | <b>Total β-Xanthophylls</b>   | <b>S8_171705574</b> | <b>GBS</b>         | <b>8</b> | <b>171,705,574</b> | <b>9.66E-08</b> | <b>9.24E-03</b> | <b>0.10</b> | <b>189</b> | <b>0.25</b> | <b>0.13</b> | <b>0.12</b> | <b>0.27</b> | <b>-0.41</b> | <b>0.40</b>  | <b>-0.74</b> |
|                                      |               |      | <b>α-Carotene/Zeaxanthin</b>  | <b>ss196491114</b>  | <b>55K</b>         | <b>9</b> | <b>69,215,031</b>  | <b>8.69E-10</b> | <b>8.59E-05</b> | <b>0.32</b> | <b>190</b> | <b>0.37</b> | <b>0.29</b> | <b>0.17</b> | <b>0.36</b> | <b>-0.06</b> | <b>-0.25</b> | <b>0.29</b>  |
|                                      |               |      | <b>Zeinoxanthin/Lutein</b>    | <b>ss196491114</b>  | <b>55K</b>         | <b>9</b> | <b>69,215,031</b>  | <b>1.13E-07</b> | <b>1.08E-02</b> | <b>0.29</b> | <b>189</b> | <b>0.37</b> | <b>0.29</b> | <b>0.09</b> | <b>0.24</b> | <b>0.19</b>  | <b>-0.35</b> | <b>-0.39</b> |
|                                      |               |      | <b>Zeinoxanthin</b>           | <b>ss196491114</b>  | <b>55K</b>         | <b>9</b> | <b>69,215,031</b>  | <b>4.90E-07</b> | <b>3.53E-02</b> | <b>0.30</b> | <b>192</b> | <b>0.37</b> | <b>0.29</b> | <b>0.10</b> | <b>0.23</b> | <b>0.11</b>  | <b>-0.25</b> | <b>-0.34</b> |

Statistically significant results from genome-wide association studies on 24 grain carotenoid traits with the peak marker tagging the GWAS signal from *crtRB1* included as a covariate. Markers (Column E) that were significantly associated with the indicated trait (Column D) at 5% false discovery rate (FDR) are demarcated with boldface font and those significant only at 10% FDR without boldface font.

Table S8 Genome-wide Association Study Results with Covariates for *lut1*, *zep1*, *lycE* and *crtRB1* (G)

| <i>a priori</i> candidate gene pathway | RefGen_v2 Gene ID | Annotated gene containing associated SNP or gene within 3kb of associated SNP | Trait                  | SNP ID              | SNP Source | Chr      | Position in RefGen_v2 | P-value         | FDR-Adjusted P-value | Minor Allele Frequency (MAF) | Sample Size | MAF Tropical (8% of 201 Lines) | MAF Temperate (92% of 201 Lines) | R-square_LR from Model without SNP | R-square_LR from Model with SNP | Effect Size  | Lambda from Box-Cox Procedure | Back-Transformed Effect Estimates |
|----------------------------------------|-------------------|-------------------------------------------------------------------------------|------------------------|---------------------|------------|----------|-----------------------|-----------------|----------------------|------------------------------|-------------|--------------------------------|----------------------------------|------------------------------------|---------------------------------|--------------|-------------------------------|-----------------------------------|
|                                        |                   |                                                                               | <b>β-Cryptoxanthin</b> | <b>S7_13843351</b>  | <b>GBS</b> | <b>7</b> | <b>13,843,351</b>     | <b>4.86E-08</b> | <b>1.42E-02</b>      | <b>0.16</b>                  | <b>177</b>  | <b>0.10</b>                    | <b>0.16</b>                      | <b>0.24</b>                        | <b>0.39</b>                     | <b>-0.04</b> | <b>0.10</b>                   | <b>-0.33</b>                      |
|                                        |                   |                                                                               | Total Carotenoids      | S7_121184182        | GBS        | 7        | 121,184,182           | 3.30E-07        | 9.66E-02             | 0.08                         | 179         | 0.14                           | 0.08                             | 0.16                               | 0.29                            | -1.41        | 0.65                          | -1.26                             |
|                                        |                   |                                                                               | Total β-Xanthophylls   | S7_121185500        | GBS        | 7        | 121,185,500           | 5.90E-07        | 8.50E-02             | 0.09                         | 173         | 0.19                           | 0.09                             | 0.41                               | 0.51                            | 0.34         | 0.40                          | 1.07                              |
|                                        |                   |                                                                               | <b>Zeaxanthin</b>      | <b>S8_171705574</b> | <b>GBS</b> | <b>8</b> | <b>171,705,574</b>    | <b>1.54E-07</b> | <b>4.44E-02</b>      | <b>0.11</b>                  | <b>174</b>  | <b>0.25</b>                    | <b>0.13</b>                      | <b>0.42</b>                        | <b>0.53</b>                     | <b>-0.25</b> | <b>0.35</b>                   | <b>-0.56</b>                      |
|                                        |                   |                                                                               | Total β-Xanthophylls   | S8_171705574        | GBS        | 8        | 171,705,574           | 3.92E-07        | 8.50E-02             | 0.10                         | 173         | 0.25                           | 0.13                             | 0.41                               | 0.51                            | -0.34        | 0.40                          | -0.65                             |

Statistically significant results from genome-wide association studies on 24 grain carotenoid traits with markers tagging the signals at *lut1*, *zep1*, *lycE*, and *crtRB1* included as covariates. Markers (Column E) that were significantly associated with the indicated trait (Column D) at 5% false discovery rate (FDR) are demarcated with boldface font and those significant only at 10% FDR without boldface font.
